# Supplementary material for: Palladium-catalysed dual ring-opening [3 + 4] annulation of isatoic anhydrides with cyclic iodoniums to build tribenzo[b,d,f]azepines and a mechanistic DFT study
Source: Royal Society of Chemistry journal article supplement (doi:10.1039/d2qo01185a), 2022-01-01

## Supporting Information

### **Palladium-catalysed dual ring-opening [3 + 4] annulation of isatoic anhydrides with cyclic iodoniums to build tribenzo[*b,d,f*]azepines and mechanistic DFT study**

Lingyu Huang, Ya-Nan Tian, Shiyan Ren, Jingwei Wang, Yi Xiao, Qiping Zhu,\* and Shiqing Li\*

*Guangxi Key Laboratory of Electrochemical and Magneto-Chemical Functional Materials, College of Chemistry and Bioengineering, Guilin University of Technology, Guilin 541004, P. R. China.*

*E-mail: [lisq@glut.edu.cn](mailto:lisq@glut.edu.cn)*

#### **Table of contents**

|                                                                                   |    |
|-----------------------------------------------------------------------------------|----|
| I. General remarks .....                                                          | 1  |
| II. General procedure for the synthesis of substrate <b>1</b> .....               | 1  |
| III. General procedure for the synthesis of the cyclic diaryliodonium salts.....  | 2  |
| IV. General procedure for the synthesis of tribenzo[ <i>b,d,f</i> ]azepines ..... | 4  |
| V. Mechanistic studies .....                                                      | 5  |
| VI. X-ray Crystallographic Analysis.....                                          | 7  |
| VII. Experimental data for the described substances .....                         | 19 |
| VIII. References .....                                                            | 24 |
| IX. Copies of <sup>1</sup> H and <sup>13</sup> C NMR spectra .....                | 26 |

## I. General remarks

NMR spectra were obtained on a BRUKER Ascend500. The  $^1\text{H}$  NMR (500 MHz) chemical shifts were measured relative to  $\text{CDCl}_3$  or  $\text{DMSO-}d_6$  as the internal reference ( $\text{CDCl}_3$ :  $\delta = 7.26$  ppm;  $\text{DMSO-}d_6$ :  $\delta = 2.50$  ppm). The  $^{13}\text{C}$  NMR (125 MHz) chemical shifts were given using  $\text{CDCl}_3$  or  $\text{DMSO-}d_6$  the internal standard ( $\text{CDCl}_3$ :  $\delta = 77.16$  ppm;  $\text{DMSO-}d_6$ :  $\delta = 39.52$  ppm). High-resolution mass spectra (HR-MS) were obtained with a BRUKER solanX 70 FT-MS ( $\text{ESI}^+$ ). Melting points were determined with SGW<sup>®</sup> X-4 and are uncorrected.

Unless otherwise noted, all reagents were obtained from commercial suppliers and used without further purification. Isatoic anhydride and palladium were purchased from Beijing InnoChem Science & Technology (China) Co., Ltd. TfOH and *m*-CPBA (purity of 75%) were purchased from Adamas-Beta Co., Ltd.

## II. General procedure for the synthesis of substrate 1

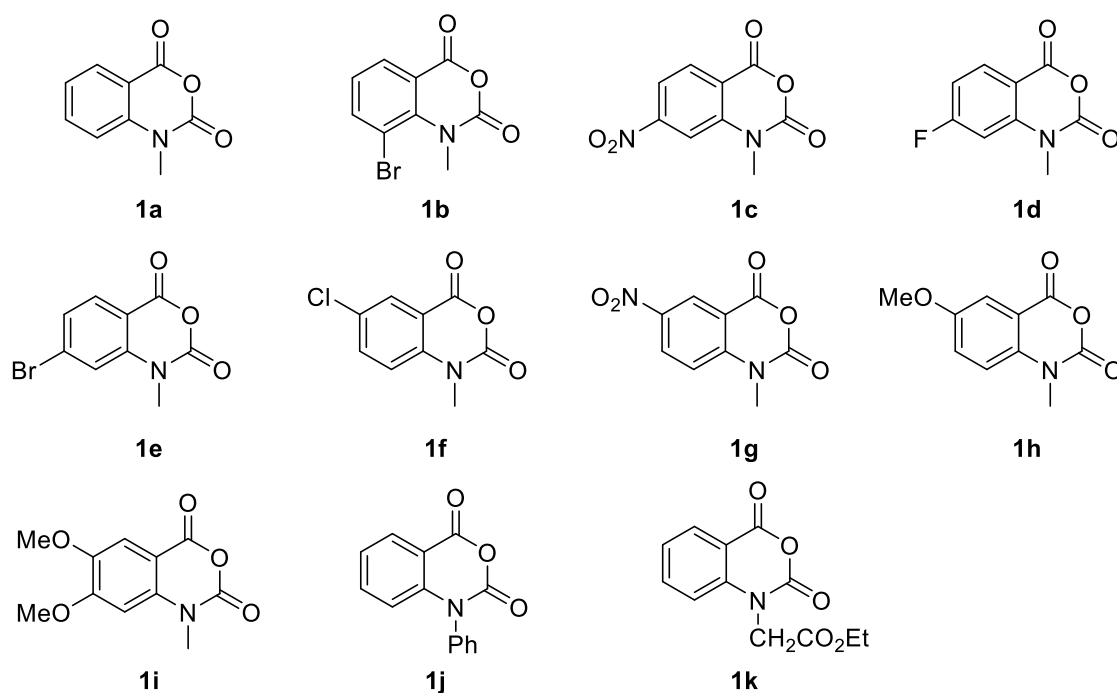

Compound **1a** was purchased from Beijing InnoChem Science & Technology (China) Co., Ltd. Compounds **1c** and **1h**;<sup>[1]</sup> **1d**, **1f** and **1i**;<sup>[2]</sup> **1e**;<sup>[2]</sup> **1g**;<sup>[4]</sup> **1j**;<sup>[5]</sup> **1k**<sup>[5]</sup> were prepared according to the modified literature procedures. Compound **1b** was prepared as follows:

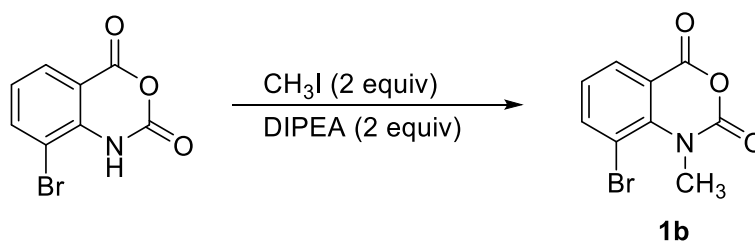

Compound **1b**: To a solution of 3-bromoisatoic anhydride (242 mg, 1 mmol) in *N,N*-dimethylacetamide (DMAc, 2 mL), diisopropylethylamine (DIPEA, 0.34 mL, 2 equiv) was added to stirred at room temperature for 10 min. Then methyl iodide (0.12 mL, 2 equiv) was added to react at 40 °C overnight. The solution was cooled to room temperature before pouring into ice water (5 mL). The resulting suspension was vigorously stirred for 1 h. The precipitated solid was collected by filtration, washing with ice water (5 mL) and *n*-hexane (5 mL), and dried to give **1b** as a yellow solid (138 mg, 54% yield).

### 8-bromo-1-methyl-2*H*-benzo[*d*][1,3]oxazine-2,4(1*H*)-dione (**1b**)

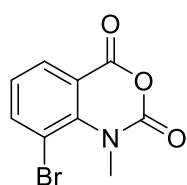

A yellow solid (138 mg, 54% yield). M.p.: 66.7–68.7 °C. <sup>1</sup>H NMR (500 MHz, CDCl<sub>3</sub>): δ = 8.13 (dd, *J* = 7.5 Hz, 1.5 Hz, 1H), 7.97 (dd, *J* = 8.0 Hz, 1.5 Hz, 1H), 7.17 (t, *J* = 7.8 Hz, 1H), 3.86 (s, 3H) ppm. <sup>13</sup>C NMR (125 MHz, CDCl<sub>3</sub>): δ = 157.75, 148.71, 143.89, 141.76, 130.38, 125.82, 116.09, 108.45, 39.37 ppm. HRMS (ESI) *m/z*: calcd for C<sub>9</sub>H<sub>7</sub>BrNO<sub>3</sub> (M+H) 255.9609, found 255.9606.

### III. General procedure for the synthesis of the cyclic diaryliodonium salts

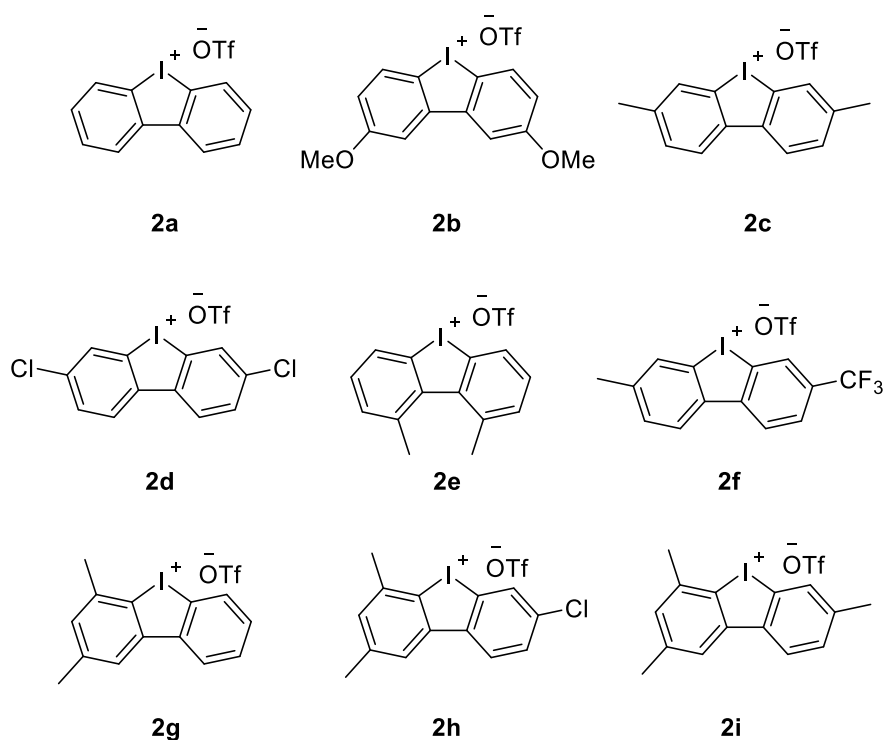

Compounds **2a-d** and **2q**;<sup>[7]</sup> **2d**;<sup>[7]</sup> **2g**<sup>[8]</sup> and **2h**<sup>[10]</sup> were prepared according to modified literature procedures. Compounds **2f** and **2i** are prepared as follows:

#### General procedure for the preparation of 2-aminobiaryl derivatives (2')

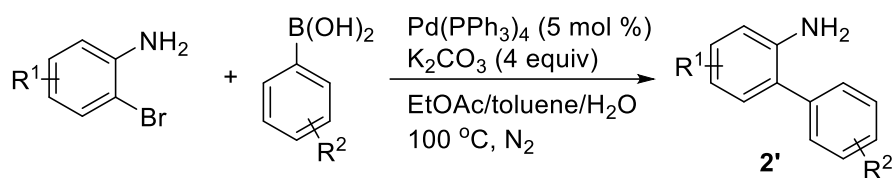

2-Bromonaniline derivatives (5 mmol, 1 equiv), arylboronic acids (7.5 mmol, 1.5 equiv), K<sub>2</sub>CO<sub>3</sub> (2.76 g, 20 mmol, 4 equiv), Pd(PPh<sub>3</sub>)<sub>4</sub> (288.9 mg, 5 mol %), EtOH (10 mL), toluene (20 mL) and H<sub>2</sub>O (8 mL) were added to a round-bottom flask. The mixture was stirred at 100 °C for 16 h under nitrogen atmosphere. After being cooled down to room temperature, the mixture was extracted with EtOAc (3 × 30 mL). The combined organic phase was dried by Na<sub>2</sub>SO<sub>4</sub>, and filtered. After removal of volatile components from the filtrate, the resulting crude products was purified by column chromatography on a silica gel to afford the desired 2-aminobiaryl derivatives (**2'**).

#### General procedure for the preparation of 2-iodobiaryl (**2''**) from 2-aminobiaryl

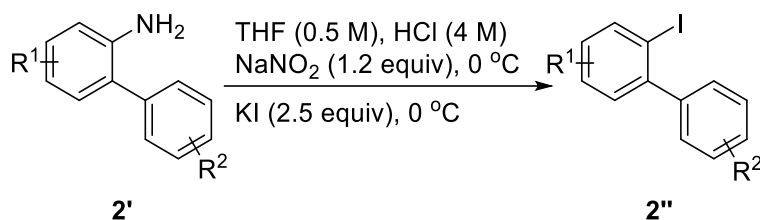

To a solution of **2'** (5 mmol, 1 equiv) in THF (10 mL) was added 4 M aqueous HCl (10 mL). After cooled down to 0 °C in an ice water bath, an aqueous solution of NaNO<sub>2</sub> (414 mg, 6 mmol, 1.2 equiv) in water (6 mL) was added dropwise. After 20 min stirring under the same temperature, a solution of KI (2.08 g, 12.5 mmol, 2.5 equiv) in H<sub>2</sub>O (10 mL) was added. The reaction mixture was stirred at 0 °C for 10 min, then removed the ice water bath. The reaction was stirred overnight at room temperature before 1 M aqueous Na<sub>2</sub>S<sub>2</sub>O<sub>3</sub> was added until the color of the mixture didn't change. The phases were separated, and the aqueous phase was extracted with EtOAc (3 × 30 mL). The combined organic layers were washed with H<sub>2</sub>O (3 × 10 mL), dried over anhydrous Na<sub>2</sub>SO<sub>4</sub>, concentrated by rotary evaporation. The residue was purified by column chromatography on silica gel to afford the desired 2-iodobiaryl derivatives (**2''**).

#### General procedure of the preparation of cyclic diaryliodonium salts (**2**)

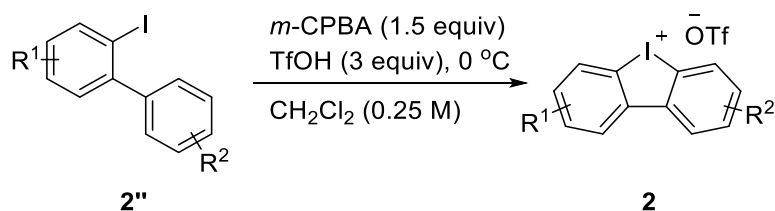

To a stirred solution of **2''** (5 mmol, 1 equiv) in CH<sub>2</sub>Cl<sub>2</sub> (20 mL) was added *m*-CPBA (1.73 g, 75%, 7.5 mmol, 1.5 equiv), and TfOH (3 equiv) at ice-bath. The solution was stirred for 3 h at room temperature before CH<sub>2</sub>Cl<sub>2</sub> was removed by rotary evaporation. To the residue was added Et<sub>2</sub>O (20 mL), and the resulting mixture was stirred for 20 min. The solid precipitate was collected by vacuum

filtration, washed with Et<sub>2</sub>O for three times, and dried under vacuum to afford cyclic diaryliodonium salt derivatives (**2**).

### 3-methyl-7-(trifluoromethyl)dibenzo[*b,d*]iodol-5-ium triflate (**2f**)

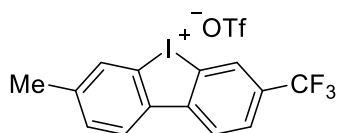

A white solid (1100 mg, 43% yield). M.p.: > 240 °C. <sup>1</sup>H NMR (500 MHz, DMSO-*d*<sub>6</sub>): δ = 8.62 (d, *J* = 8.0 Hz, 1H), 8.50–8.48 (m, 2H), 8.20 (d, *J* = 7.5 Hz, 2H), 8.01 (s, 1H), 7.72 (d, *J* = 7.5 Hz, 1H), 2.52 (s, 3H) ppm. <sup>13</sup>C NMR (125 MHz, DMSO-*d*<sub>6</sub>): δ = 145.65, 143.01, 137.71, 131.91, 130.34, 129.61 (q, *J*<sub>C-F</sub> = 32.6 Hz), 127.65, 127.49 (q, *J*<sub>C-F</sub> = 4.0 Hz), 127.26, 123.36 (q, *J*<sub>C-F</sub> = 270.9 Hz), 123.02, 121.74, 119.40, 21.33 ppm. HRMS (ESI) *m/z*: calcd for C<sub>14</sub>H<sub>9</sub>F<sub>3</sub>I<sup>+</sup> ([M-OTf]<sup>+</sup>) 360.9696, found 360.9697.

### 2,4,7-trimethyldibenzo[*b,d*]iodol-5-ium triflate (**2i**)

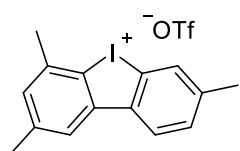

A white solid (1505 mg, 64% yield). M.p.: > 240 °C. <sup>1</sup>H NMR (500 MHz, DMSO-*d*<sub>6</sub>): δ = 8.25–8.21 (m, 1H), 8.06–7.98 (m, 2H), 7.64 (s, 1H), 7.34–7.32 (m, 1H), 2.61–2.59 (m, 3H), 2.48 (s, 3H), 2.44 (d, *J* = 3.5 Hz) ppm. <sup>13</sup>C NMR (125 MHz, DMSO-*d*<sub>6</sub>): δ = 142.05, 141.62, 141.20, 139.87, 138.81, 131.92, 131.85, 130.81, 127.17, 124.71, 122.12, 121.86, 24.70, 21.28, 20.60 ppm. HRMS (ESI) *m/z*: calcd for C<sub>15</sub>H<sub>14</sub>I<sup>+</sup> ([M-OTf]<sup>+</sup>) 321.0135, found 321.0137.

## IV. General procedure for the synthesis of tribenzo[*b,d,f*]azepines

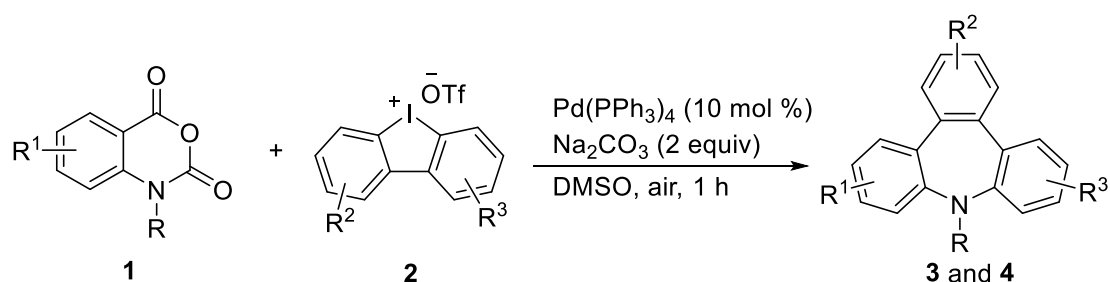

To a dry Schlenk tube containing a magnetic stir bar was added **1** (0.3 mmol), cyclic diaryliodonium salts **2** (0.2 mmol), Na<sub>2</sub>CO<sub>3</sub> (42.4 mg, 0.4 mmol, 2 equiv), Pd(PPh<sub>3</sub>)<sub>4</sub> (23.1 mg, 10 mol %) and DMSO (2 mL). The reaction mixture was stirred at 140 °C for 1 h under air before it was cooled to room temperature. The mixture was purified by a silica gel column (200-300 mesh), eluting with petroleum ether/EtOAc (100/1→50/1, v/v) to afford products **3** and **4**.

**Scale-up reaction:** To a dry Schlenk tube containing a magnetic stir bar was added **1a** (1.5 mmol), cyclic diaryliodonium salts **2a** (1 mmol), Na<sub>2</sub>CO<sub>3</sub> (212.0 mg, 2 mmol, 2 equiv), Pd(PPh<sub>3</sub>)<sub>4</sub> (115.6 mg, 10 mol %) and DMSO (10 mL). The reaction mixture was stirred at 140 °C for 3 h under air before it

was cooled to room temperature. The mixture was purified by a silica gel column (200-300 mesh), eluting with petroleum ether/EtOAc (100/1, v/v) to afford products **3a** (224 mg, 87%).

## V. Mechanistic studies

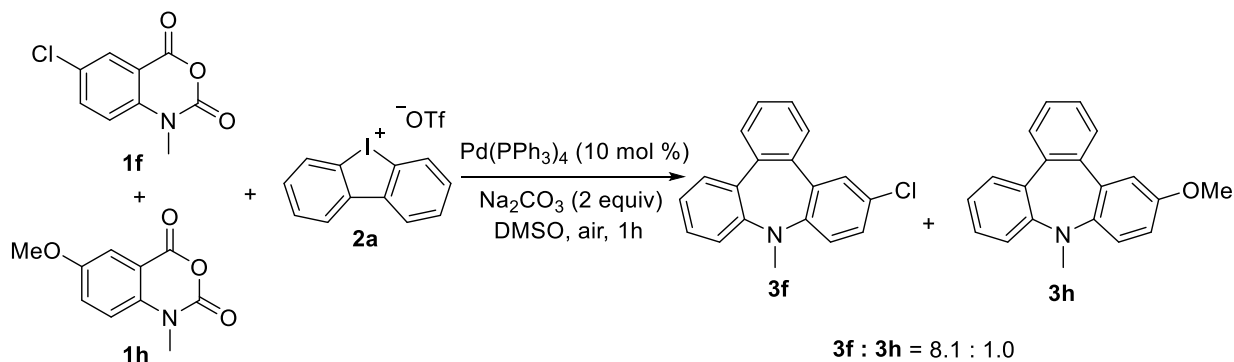

To a dry Schlenk tube with a magnetic stir bar was charged with **1h** (0.15 mmol, 1.5 equiv), **1f** (0.15 mmol, 1.5 equiv), **2a** (43 mg, 0.1 mmol, 1 equiv),  $\text{Na}_2\text{CO}_3$  (21.2 mg, 0.2 mmol, 2 equiv),  $\text{Pd}(\text{PPh}_3)_4$  (11.6 mg, 10 mol %) and DMSO (1 mL). The reaction mixture was stirred at 140 °C for 1 h under air before it was cooled to room temperature. And the mixture was purified by a silica gel column (200-300 mesh), eluting with petroleum ether/EtOAc (80/1, v/v) to afford a mixture of **3f** and **3h**. The ratio of **3f/3h** was determined to be 8.1/1.0 by  $^1\text{H}$  NMR (see below).

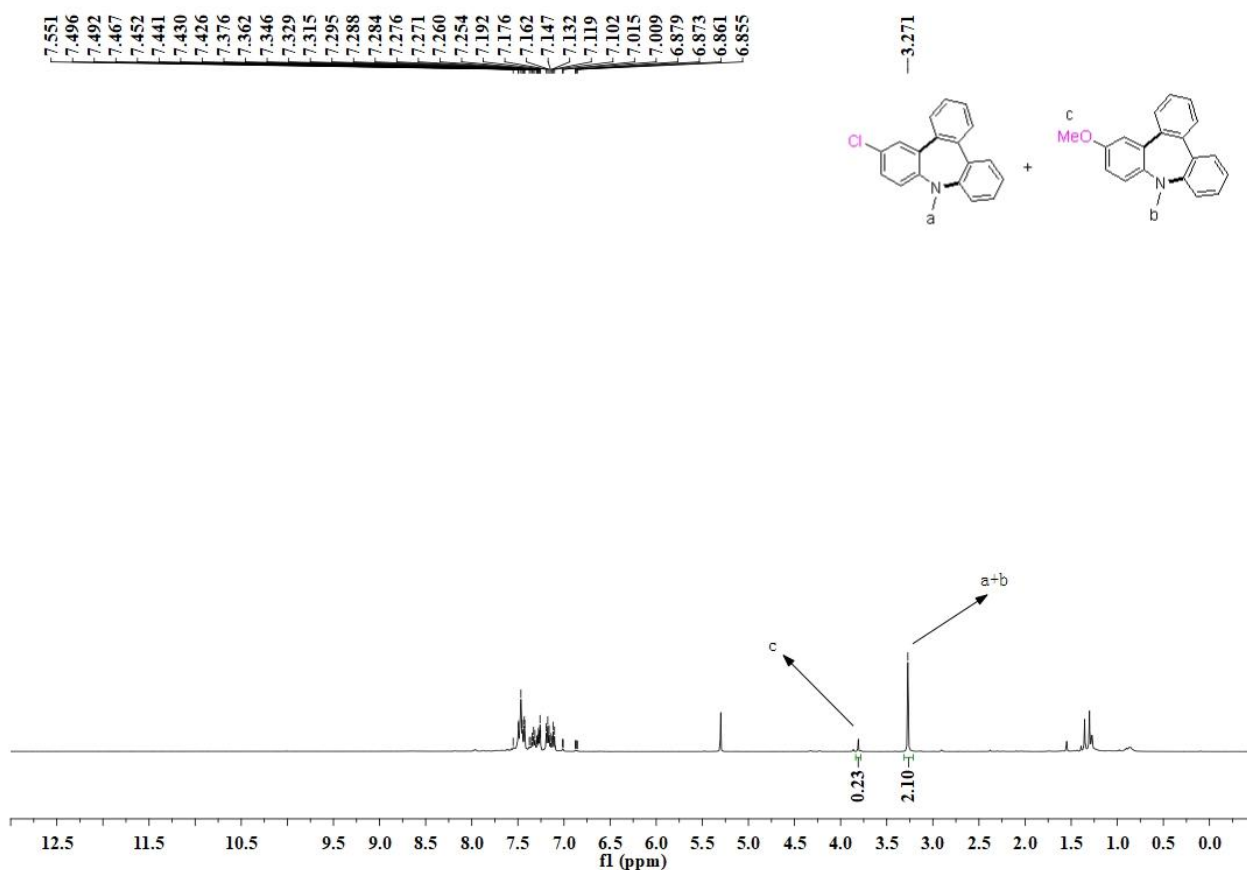

**Figure S1.**  $^1\text{H}$  NMR (500 MHz,  $\text{CDCl}_3$ ) of the mixture of **3h** and **3f**

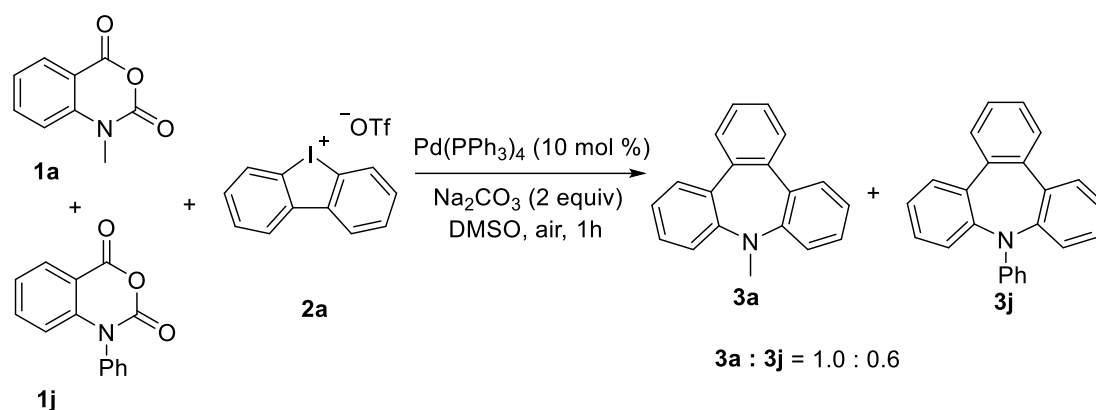

To a dry Schlenk tube with a magnetic stir bar was charged with **1a** (0.15 mmol, 1.5 equiv), **1j** (0.15 mmol, 1.5 equiv), **2a** (43 mg, 0.1 mmol, 1 equiv),  $\text{Na}_2\text{CO}_3$  (21.2 mg, 0.2 mmol, 2 equiv),  $\text{Pd(PPh}_3)_4$  (11.6 mg, 10 mol %) and DMSO (1 mL). The reaction mixture was stirred at 140 °C for 1 h under air before it was cooled to room temperature. And the mixture was purified by a silica gel column (200-300 mesh), eluting with petroleum ether/EtOAc (60/1, v/v) to afford a mixture of **3a** and **3j**. The ratio of **3a/3j** was determined to be 1.0/0.6 by  $^1\text{H}$  NMR (see below).

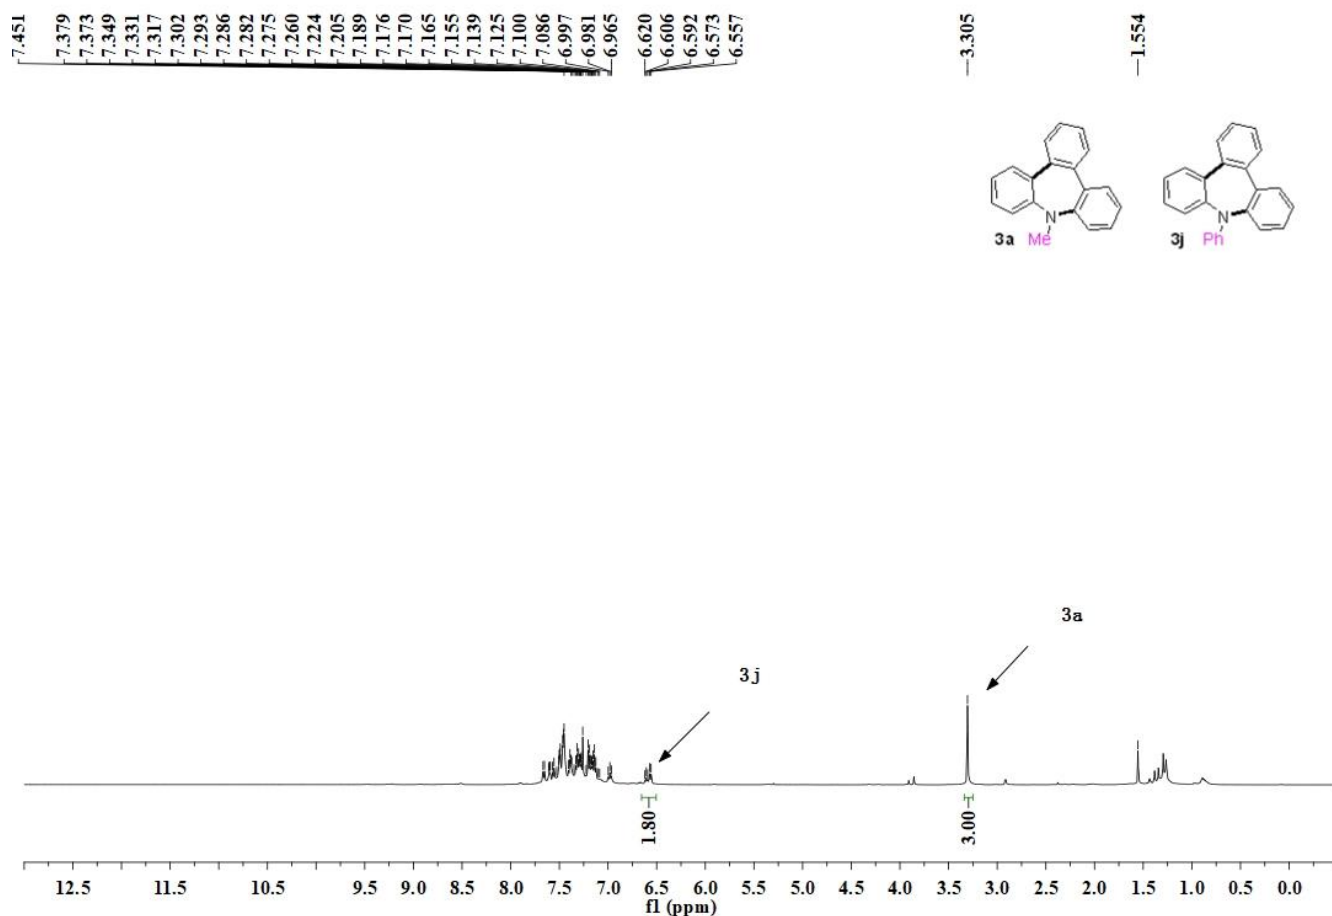

**Figure S2.**  $^1\text{H}$  NMR (500 MHz,  $\text{CDCl}_3$ ) of the mixture of **3a** and **3j**

## VI. X-ray Crystallographic Analysis

General Crystal Growing Conditions of **4j**: X-ray quality single crystals of **4j** was grown from the co-solvent of DCM, MeOH, EA and petroleum ether (5:1:1:1, v/v) at room temperature by slow evaporation for three days.

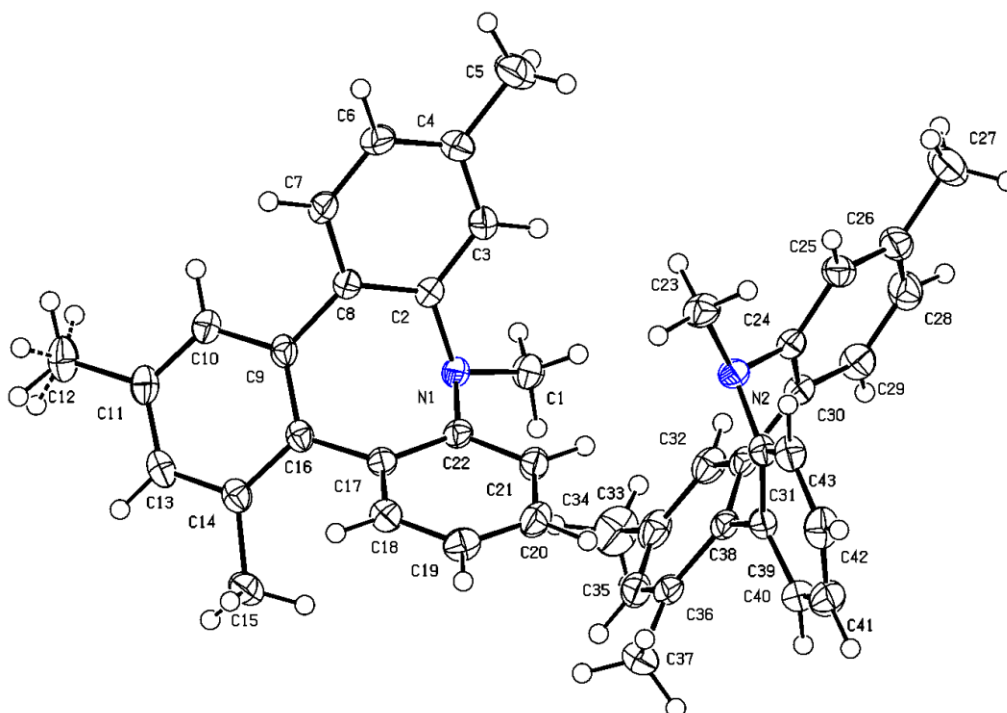

**Figure S3** The molecular structure of **4j** (CCDC 2190754). Thermal ellipsoids are shown at the 50% probability level.

**Table S1** Crystal data and structure refinement for mo\_20220424LWX\_201321\_HLY\_674\_ZCS\_0m\_sq.

|                     |                                                |
|---------------------|------------------------------------------------|
| Identification code | mo_20220424LWX_201321_HLY_674_ZCS_0m_sq        |
| Empirical formula   | C <sub>88</sub> H <sub>84</sub> N <sub>4</sub> |
| Formula weight      | 1197.59                                        |
| Temperature/K       | 193.00                                         |
| Crystal system      | triclinic                                      |
| Space group         | P-1                                            |
| a/Å                 | 8.4028(5)                                      |
| b/Å                 | 11.9177(8)                                     |



|                                               |                                                               |
|-----------------------------------------------|---------------------------------------------------------------|
| $c/\text{\AA}$                                | 18.7199(11)                                                   |
| $\alpha/^\circ$                               | 78.497(3)                                                     |
| $\beta/^\circ$                                | 86.338(2)                                                     |
| $\gamma/^\circ$                               | 74.483(2)                                                     |
| Volume/ $\text{\AA}^3$                        | 1769.93(19)                                                   |
| Z                                             | 1                                                             |
| $\rho_{\text{calc}}/\text{g/cm}^3$            | 1.124                                                         |
| $\mu/\text{mm}^{-1}$                          | 0.065                                                         |
| F(000)                                        | 640.0                                                         |
| Crystal size/ $\text{mm}^3$                   | $0.2 \times 0.1 \times 0.02$                                  |
| Radiation                                     | MoK $\alpha$ ( $\lambda = 0.71073$ )                          |
| $2\Theta$ range for data collection/ $^\circ$ | 3.864 to 54.932                                               |
| Index ranges                                  | $-10 \leq h \leq 10, -15 \leq k \leq 15, -24 \leq l \leq 24$  |
| Reflections collected                         | 38325                                                         |
| Independent reflections                       | 8076 [ $R_{\text{int}} = 0.0665, R_{\text{sigma}} = 0.0473$ ] |
| Data/restraints/parameters                    | 8076/3/436                                                    |
| Goodness-of-fit on $F^2$                      | 1.049                                                         |
| Final R indexes [ $I \geq 2\sigma(I)$ ]       | $R_1 = 0.0491, wR_2 = 0.1269$                                 |
| Final R indexes [all data]                    | $R_1 = 0.0685, wR_2 = 0.1402$                                 |
| Largest diff. peak/hole / $e \text{\AA}^{-3}$ | 0.27/-0.25                                                    |

**Table S2 Fractional Atomic Coordinates ( $\times 10^4$ ) and Equivalent Isotropic Displacement Parameters ( $\text{\AA}^2 \times 10^3$ ) for mo\_20220424LWX\_201321\_HLY\_674\_ZCS\_0m\_sq.  $U_{\text{eq}}$  is defined as 1/3 of the trace of the orthogonalised  $U_{\text{IJ}}$  tensor.**

| Atom | $x$        | $y$        | $z$       | $U(\text{eq})$ |
|------|------------|------------|-----------|----------------|
| N2   | 94.7(15)   | 5725.8(10) | 2682.1(7) | 24.5(3)        |
| N1   | 4519.4(15) | 7413.4(10) | 2352.0(6) | 22.9(3)        |
| C22  | 4007.2(17) | 7499.0(12) | 1620.2(8) | 22.2(3)        |
| C17  | 4619.5(17) | 8236.3(12) | 1043.9(8) | 22.9(3)        |
| C38  | 2665.3(17) | 3846.6(12) | 2242.0(8) | 24.4(3)        |

**Table S2 Fractional Atomic Coordinates ( $\times 10^4$ ) and Equivalent Isotropic Displacement Parameters ( $\text{\AA}^2 \times 10^3$ ) for mo\_20220424LWX\_201321\_HLY\_674\_ZCS\_0m\_sq.  $U_{\text{eq}}$  is defined as 1/3 of the trace of the orthogonalised  $U_{\text{IJ}}$  tensor.**

| Atom | x           | y           | z          | U(eq)   |
|------|-------------|-------------|------------|---------|
| C39  | 1008.5(17)  | 4251.5(13)  | 1898.4(8)  | 24.4(3) |
| C14  | 7344.5(18)  | 8760.7(12)  | 719.5(8)   | 26.1(3) |
| C16  | 5917.7(17)  | 8817.7(12)  | 1171.4(8)  | 22.8(3) |
| C9   | 5736.7(17)  | 9440.1(12)  | 1748.4(8)  | 23.9(3) |
| C2   | 3809.7(17)  | 8499.1(12)  | 2607.6(7)  | 22.6(3) |
| C44  | -203.2(17)  | 5220.3(12)  | 2083.8(8)  | 23.9(3) |
| C24  | 70.6(18)    | 4925.2(13)  | 3360.9(8)  | 24.4(3) |
| C31  | 2814.1(18)  | 3650.7(12)  | 3004.5(8)  | 24.3(3) |
| C8   | 4311.4(17)  | 9516.6(12)  | 2269.0(8)  | 23.5(3) |
| C30  | 1357.9(18)  | 3875.5(13)  | 3500.5(8)  | 25.4(3) |
| C10  | 6945.4(18)  | 9998.0(13)  | 1862.8(8)  | 27.0(3) |
| C18  | 3991.3(18)  | 8388.2(13)  | 347.3(8)   | 27.3(3) |
| C11  | 8361.7(18)  | 9929.9(13)  | 1428.9(9)  | 28.7(3) |
| C43  | -1675.8(19) | 5667.7(14)  | 1695.9(8)  | 29.7(3) |
| C3   | 2668.4(19)  | 8567.0(13)  | 3183.8(8)  | 28.1(3) |
| C21  | 2897.3(18)  | 6887.3(13)  | 1480.7(8)  | 27.3(3) |
| C25  | -1177.9(18) | 5160.1(14)  | 3884.4(8)  | 29.1(3) |
| C7   | 3553.1(19)  | 10588.5(13) | 2490.7(9)  | 28.8(3) |
| C32  | 4379.5(19)  | 3232.6(13)  | 3318.6(9)  | 31.1(3) |
| C20  | 2345.5(19)  | 7026.0(14)  | 777.6(9)   | 31.6(3) |
| C36  | 4122.4(19)  | 3640.3(13)  | 1807.2(9)  | 29.2(3) |
| C1   | 4446(2)     | 6318.2(13)  | 2861.9(8)  | 29.9(3) |
| C13  | 8531.9(18)  | 9305.3(13)  | 864.0(8)   | 28.5(3) |
| C40  | 631(2)      | 3698.6(15)  | 1362.4(9)  | 31.9(3) |
| C35  | 5646.3(19)  | 3229.5(14)  | 2148.7(10) | 34.1(4) |
| C4   | 1958(2)     | 9637.5(14)  | 3416.6(9)  | 31.8(3) |
| C6   | 2379(2)     | 10649.7(14) | 3049.5(9)  | 32.6(4) |
| C29  | 1293(2)     | 3086.5(14)  | 4156.6(8)  | 32.6(4) |

**Table S2 Fractional Atomic Coordinates ( $\times 10^4$ ) and Equivalent Isotropic Displacement Parameters ( $\text{\AA}^2 \times 10^3$ ) for mo\_20220424LWX\_201321\_HLY\_674\_ZCS\_0m\_sq.  $U_{eq}$  is defined as 1/3 of the trace of the orthogonalised  $U_{ij}$  tensor.**

| Atom | x          | y           | z          | $U_{eq}$ |
|------|------------|-------------|------------|----------|
| C33  | 5812.2(19) | 3015.3(14)  | 2895.4(10) | 34.9(4)  |
| C42  | -1975(2)   | 5132.7(15)  | 1142.6(9)  | 35.5(4)  |
| C23  | -804(2)    | 6970.0(13)  | 2668.0(9)  | 32.9(4)  |
| C26  | -1218(2)   | 4367.8(16)  | 4536.7(9)  | 34.4(4)  |
| C19  | 2869.0(19) | 7790.2(14)  | 213.7(9)   | 31.2(3)  |
| C41  | -839(2)    | 4136.4(16)  | 985.7(9)   | 36.4(4)  |
| C15  | 7676(2)    | 8124.1(15)  | 80.9(9)    | 34.0(4)  |
| C28  | 33(2)      | 3322.1(16)  | 4662.8(9)  | 37.1(4)  |
| C37  | 4131(2)    | 3868.2(17)  | 982.6(9)   | 40.0(4)  |
| C12  | 9699(2)    | 10478.1(17) | 1579.2(11) | 40.2(4)  |
| C27  | -2594(2)   | 4631(2)     | 5087.7(10) | 48.7(5)  |
| C5   | 773(3)     | 9672.8(18)  | 4057.3(11) | 50.8(5)  |
| C34  | 7500(2)    | 2598.0(19)  | 3242.6(13) | 53.8(5)  |

**Table S3 Anisotropic Displacement Parameters ( $\text{\AA}^2 \times 10^3$ ) for mo\_20220424LWX\_201321\_HLY\_674\_ZCS\_0m\_sq. The Anisotropic displacement factor exponent takes the form:  $-2\pi^2[h^2a^*U_{11}+2hka^*b^*U_{12}+\dots]$ .**

| Atom | $U_{11}$ | $U_{22}$ | $U_{33}$ | $U_{23}$ | $U_{13}$ | $U_{12}$ |
|------|----------|----------|----------|----------|----------|----------|
| N2   | 25.5(6)  | 19.5(6)  | 27.2(6)  | -5.2(5)  | 0.7(5)   | -3.5(5)  |
| N1   | 26.6(6)  | 18.3(6)  | 23.8(6)  | -2.3(5)  | 0.8(5)   | -7.3(5)  |
| C22  | 22.1(7)  | 16.4(6)  | 26.9(7)  | -4.5(5)  | 0.1(5)   | -2.7(5)  |
| C17  | 21.7(7)  | 18.8(6)  | 26.9(7)  | -4.8(5)  | 2.3(5)   | -3.4(5)  |
| C38  | 24.4(7)  | 17.4(6)  | 32.6(8)  | -7.3(6)  | 2.3(6)   | -6.2(5)  |
| C39  | 24.6(7)  | 23.9(7)  | 25.3(7)  | -3.7(6)  | 2.8(6)   | -8.6(6)  |
| C14  | 25.9(7)  | 21.4(7)  | 27.0(7)  | 1.5(6)   | 1.1(6)   | -4.3(6)  |
| C16  | 22.2(7)  | 18.5(6)  | 24.9(7)  | 0.7(5)   | 0.6(5)   | -4.4(5)  |
| C9   | 23.8(7)  | 18.5(7)  | 28.0(7)  | 0.0(6)   | 1.8(6)   | -6.5(5)  |
| C2   | 23.7(7)  | 20.8(7)  | 24.1(7)  | -4.5(6)  | -1.7(5)  | -6.7(5)  |

**Table S3 Anisotropic Displacement Parameters ( $\text{\AA}^2 \times 10^3$ ) for mo\_20220424LWX\_201321\_HLY\_674\_ZCS\_0m\_sq. The Anisotropic displacement factor exponent takes the form:  $-2\pi^2[h^2a^{*2}U_{11}+2hka^*b^*U_{12}+\dots]$ .**

| Atom | U <sub>11</sub> | U <sub>22</sub> | U <sub>33</sub> | U <sub>23</sub> | U <sub>13</sub> | U <sub>12</sub> |
|------|-----------------|-----------------|-----------------|-----------------|-----------------|-----------------|
| C44  | 24.2(7)         | 23.0(7)         | 24.6(7)         | -1.4(6)         | 1.8(6)          | -8.8(6)         |
| C24  | 25.1(7)         | 25.4(7)         | 25.6(7)         | -7.6(6)         | -0.8(6)         | -9.3(6)         |
| C31  | 25.4(7)         | 16.5(6)         | 31.3(8)         | -5.4(6)         | -0.4(6)         | -5.3(5)         |
| C8   | 23.2(7)         | 22.9(7)         | 25.8(7)         | -5.8(6)         | 1.0(5)          | -7.9(5)         |
| C30  | 26.9(7)         | 25.1(7)         | 26.2(7)         | -7.0(6)         | -1.3(6)         | -8.3(6)         |
| C10  | 28.3(7)         | 23.5(7)         | 30.3(8)         | -3.5(6)         | -0.5(6)         | -9.6(6)         |
| C18  | 27.2(7)         | 24.5(7)         | 27.6(8)         | -2.1(6)         | -0.5(6)         | -4.3(6)         |
| C11  | 25.2(7)         | 24.9(7)         | 34.2(8)         | 3.1(6)          | -3.4(6)         | -9.0(6)         |
| C43  | 26.1(8)         | 27.8(8)         | 33.4(8)         | -1.7(6)         | 0.3(6)          | -6.8(6)         |
| C3   | 29.4(8)         | 26.4(7)         | 29.5(8)         | -4.1(6)         | 3.4(6)          | -10.9(6)        |
| C21  | 25.9(7)         | 23.1(7)         | 34.1(8)         | -5.8(6)         | 2.3(6)          | -8.6(6)         |
| C25  | 24.7(7)         | 35.1(8)         | 29.5(8)         | -10.6(6)        | 0.3(6)          | -7.8(6)         |
| C7   | 30.2(8)         | 22.3(7)         | 36.5(8)         | -8.8(6)         | 3.6(6)          | -9.8(6)         |
| C32  | 29.8(8)         | 22.7(7)         | 40.0(9)         | -5.4(6)         | -6.1(7)         | -4.7(6)         |
| C20  | 29.7(8)         | 29.3(8)         | 40.0(9)         | -10.3(7)        | -3.3(7)         | -11.3(6)        |
| C36  | 29.9(8)         | 20.5(7)         | 39.8(9)         | -12.0(6)        | 6.9(6)          | -8.1(6)         |
| C1   | 36.2(8)         | 20.7(7)         | 30.3(8)         | 0.2(6)          | 0.2(6)          | -7.0(6)         |
| C13  | 21.6(7)         | 27.9(8)         | 31.6(8)         | 2.8(6)          | 3.3(6)          | -6.0(6)         |
| C40  | 35.0(8)         | 32.1(8)         | 32.3(8)         | -11.9(7)        | 4.8(7)          | -11.8(7)        |
| C35  | 24.0(8)         | 25.4(8)         | 55.5(11)        | -14.7(7)        | 9.5(7)          | -8.1(6)         |
| C4   | 29.7(8)         | 35.4(9)         | 31.6(8)         | -11.7(7)        | 6.3(6)          | -8.5(7)         |
| C6   | 32.8(8)         | 27.8(8)         | 39.3(9)         | -15.1(7)        | 4.8(7)          | -6.6(6)         |
| C29  | 37.1(9)         | 30.0(8)         | 29.5(8)         | -2.2(6)         | -4.4(7)         | -8.1(7)         |
| C33  | 26.0(8)         | 22.7(7)         | 56.7(11)        | -9.7(7)         | -4.2(7)         | -4.9(6)         |
| C42  | 33.6(9)         | 40.2(9)         | 33.2(9)         | 0.4(7)          | -8.4(7)         | -13.7(7)        |
| C23  | 33.5(8)         | 22.7(7)         | 39.7(9)         | -7.5(7)         | -0.5(7)         | -1.4(6)         |
| C26  | 33.7(8)         | 48.7(10)        | 28.1(8)         | -13.5(7)        | 3.6(6)          | -19.5(7)        |
| C19  | 30.2(8)         | 32.3(8)         | 30.7(8)         | -8.2(6)         | -5.8(6)         | -4.8(6)         |

**Table S3 Anisotropic Displacement Parameters ( $\text{\AA}^2 \times 10^3$ ) for mo\_20220424LWX\_201321\_HLY\_674\_ZCS\_0m\_sq. The Anisotropic displacement factor exponent takes the form:  $-2\pi^2[h^2a^{*2}U_{11}+2hka^*b^*U_{12}+\dots]$ .**

| Atom | U <sub>11</sub> | U <sub>22</sub> | U <sub>33</sub> | U <sub>23</sub> | U <sub>13</sub> | U <sub>12</sub> |
|------|-----------------|-----------------|-----------------|-----------------|-----------------|-----------------|
| C41  | 40.4(9)         | 42.7(10)        | 32.3(8)         | -11.1(7)        | -3.5(7)         | -17.7(8)        |
| C15  | 31.4(8)         | 37.2(9)         | 33.0(8)         | -8.7(7)         | 8.6(7)          | -8.6(7)         |
| C28  | 45.8(10)        | 42.6(10)        | 25.2(8)         | -0.7(7)         | -0.4(7)         | -19.8(8)        |
| C37  | 37.9(9)         | 47.6(10)        | 40.0(9)         | -18.8(8)        | 13.8(7)         | -16.0(8)        |
| C12  | 32.2(9)         | 45.9(10)        | 46.5(11)        | -2.1(8)         | -2.7(8)         | -21.3(8)        |
| C27  | 43.9(11)        | 72.1(14)        | 35.9(10)        | -14.9(9)        | 13.0(8)         | -24.5(10)       |
| C5   | 53.1(12)        | 46.0(11)        | 52.8(12)        | -17.6(9)        | 26.4(9)         | -12.2(9)        |
| C34  | 28.4(9)         | 50.2(11)        | 81.5(15)        | -15.4(11)       | -12.4(9)        | -3.1(8)         |

**Table S4 Bond Lengths for mo\_20220424LWX\_201321\_HLY\_674\_ZCS\_0m\_sq.**

| Atom | Atom | Length/ $\text{\AA}$ | Atom | Atom | Length/ $\text{\AA}$ |
|------|------|----------------------|------|------|----------------------|
| N2   | C44  | 1.4372(18)           | C31  | C30  | 1.487(2)             |
| N2   | C24  | 1.4315(19)           | C31  | C32  | 1.398(2)             |
| N2   | C23  | 1.4687(18)           | C8   | C7   | 1.397(2)             |
| N1   | C22  | 1.4383(18)           | C30  | C29  | 1.398(2)             |
| N1   | C2   | 1.4339(17)           | C10  | C11  | 1.391(2)             |
| N1   | C1   | 1.4687(18)           | C18  | C19  | 1.386(2)             |
| C22  | C17  | 1.412(2)             | C11  | C13  | 1.389(2)             |
| C22  | C21  | 1.393(2)             | C11  | C12  | 1.509(2)             |
| C17  | C16  | 1.494(2)             | C43  | C42  | 1.387(2)             |
| C17  | C18  | 1.398(2)             | C3   | C4   | 1.398(2)             |
| C38  | C39  | 1.489(2)             | C21  | C20  | 1.387(2)             |
| C38  | C31  | 1.408(2)             | C25  | C26  | 1.391(2)             |
| C38  | C36  | 1.419(2)             | C7   | C6   | 1.390(2)             |
| C39  | C44  | 1.406(2)             | C32  | C33  | 1.392(2)             |
| C39  | C40  | 1.399(2)             | C20  | C19  | 1.382(2)             |
| C14  | C16  | 1.417(2)             | C36  | C35  | 1.390(2)             |

**Table S4 Bond Lengths for mo\_20220424LWX\_201321\_HLY\_674\_ZCS\_0m\_sq.**

| Atom | Atom | Length/Å   | Atom | Atom | Length/Å |
|------|------|------------|------|------|----------|
| C14  | C13  | 1.393(2)   | C36  | C37  | 1.513(2) |
| C14  | C15  | 1.513(2)   | C40  | C41  | 1.384(2) |
| C16  | C9   | 1.406(2)   | C35  | C33  | 1.379(2) |
| C9   | C8   | 1.4901(19) | C4   | C6   | 1.386(2) |
| C9   | C10  | 1.402(2)   | C4   | C5   | 1.509(2) |
| C2   | C8   | 1.408(2)   | C29  | C28  | 1.384(2) |
| C2   | C3   | 1.397(2)   | C33  | C34  | 1.514(2) |
| C44  | C43  | 1.396(2)   | C42  | C41  | 1.380(2) |
| C24  | C30  | 1.409(2)   | C26  | C28  | 1.388(2) |
| C24  | C25  | 1.400(2)   | C26  | C27  | 1.511(2) |

**Table S5 Bond Angles for mo\_20220424LWX\_201321\_HLY\_674\_ZCS\_0m\_sq.**

| Atom | Atom | Atom | Angle/°    | Atom | Atom | Atom | Angle/°    |
|------|------|------|------------|------|------|------|------------|
| C44  | N2   | C23  | 116.02(12) | C2   | C8   | C9   | 121.35(12) |
| C24  | N2   | C44  | 110.92(11) | C7   | C8   | C9   | 120.08(13) |
| C24  | N2   | C23  | 116.21(12) | C7   | C8   | C2   | 118.23(13) |
| C22  | N1   | C1   | 115.53(11) | C24  | C30  | C31  | 121.78(13) |
| C2   | N1   | C22  | 110.94(11) | C29  | C30  | C24  | 117.60(14) |
| C2   | N1   | C1   | 116.05(11) | C29  | C30  | C31  | 120.41(13) |
| C17  | C22  | N1   | 118.91(12) | C11  | C10  | C9   | 121.65(14) |
| C21  | C22  | N1   | 120.80(13) | C19  | C18  | C17  | 121.53(14) |
| C21  | C22  | C17  | 120.28(13) | C10  | C11  | C12  | 121.38(15) |
| C22  | C17  | C16  | 121.12(13) | C13  | C11  | C10  | 117.74(14) |
| C18  | C17  | C22  | 117.82(13) | C13  | C11  | C12  | 120.85(15) |
| C18  | C17  | C16  | 121.05(13) | C42  | C43  | C44  | 120.18(14) |
| C31  | C38  | C39  | 120.59(13) | C2   | C3   | C4   | 121.47(14) |
| C31  | C38  | C36  | 118.81(13) | C20  | C21  | C22  | 120.25(14) |

**Table S5 Bond Angles for  
mo\_20220424LWX\_201321\_HLY\_674\_ZCS\_0m\_sq.**

| Atom | Atom | Atom | Angle/°    | Atom | Atom | Atom | Angle/°    |
|------|------|------|------------|------|------|------|------------|
| C36  | C38  | C39  | 120.59(13) | C26  | C25  | C24  | 121.91(15) |
| C44  | C39  | C38  | 121.27(13) | C6   | C7   | C8   | 121.33(14) |
| C40  | C39  | C38  | 120.71(13) | C33  | C32  | C31  | 121.68(15) |
| C40  | C39  | C44  | 117.99(14) | C19  | C20  | C21  | 120.16(14) |
| C16  | C14  | C15  | 123.59(14) | C38  | C36  | C37  | 123.90(14) |
| C13  | C14  | C16  | 119.33(14) | C35  | C36  | C38  | 118.96(15) |
| C13  | C14  | C15  | 117.07(14) | C35  | C36  | C37  | 117.12(14) |
| C14  | C16  | C17  | 121.33(13) | C11  | C13  | C14  | 122.58(14) |
| C9   | C16  | C17  | 120.04(12) | C41  | C40  | C39  | 121.46(15) |
| C9   | C16  | C14  | 118.62(13) | C33  | C35  | C36  | 122.93(15) |
| C16  | C9   | C8   | 122.72(13) | C3   | C4   | C5   | 120.15(15) |
| C10  | C9   | C16  | 120.05(13) | C6   | C4   | C3   | 118.42(14) |
| C10  | C9   | C8   | 117.22(13) | C6   | C4   | C5   | 121.42(14) |
| C8   | C2   | N1   | 118.26(12) | C4   | C6   | C7   | 120.69(14) |
| C3   | C2   | N1   | 122.07(13) | C28  | C29  | C30  | 121.99(15) |
| C3   | C2   | C8   | 119.66(13) | C32  | C33  | C34  | 121.02(17) |
| C39  | C44  | N2   | 118.86(12) | C35  | C33  | C32  | 117.85(15) |
| C43  | C44  | N2   | 121.00(13) | C35  | C33  | C34  | 121.09(16) |
| C43  | C44  | C39  | 120.13(13) | C41  | C42  | C43  | 120.18(15) |
| C30  | C24  | N2   | 118.27(13) | C25  | C26  | C27  | 120.96(16) |
| C25  | C24  | N2   | 122.06(13) | C28  | C26  | C25  | 118.08(15) |
| C25  | C24  | C30  | 119.67(14) | C28  | C26  | C27  | 120.96(16) |
| C38  | C31  | C30  | 122.49(13) | C20  | C19  | C18  | 119.83(14) |
| C32  | C31  | C38  | 119.75(14) | C42  | C41  | C40  | 119.81(15) |
| C32  | C31  | C30  | 117.77(13) | C29  | C28  | C26  | 120.71(15) |

**Table S6 Torsion Angles for mo\_20220424LWX\_201321\_HLY\_674\_ZCS\_0m\_sq.**

| <b>A</b> | <b>B</b> | <b>C</b> | <b>D</b> | <b>Angle/°</b> | <b>A</b> | <b>B</b> | <b>C</b> | <b>D</b> | <b>Angle/°</b> |
|----------|----------|----------|----------|----------------|----------|----------|----------|----------|----------------|
| N2       | C44      | C43      | C42      | -176.92(14)    | C24      | C25      | C26      | C27      | -178.91(15)    |
| N2       | C24      | C30      | C31      | 7.0(2)         | C31      | C38      | C39      | C44      | 49.5(2)        |
| N2       | C24      | C30      | C29      | -178.22(13)    | C31      | C38      | C39      | C40      | -132.57(15)    |
| N2       | C24      | C25      | C26      | 178.54(14)     | C31      | C38      | C36      | C35      | 1.3(2)         |
| N1       | C22      | C17      | C16      | 6.68(19)       | C31      | C38      | C36      | C37      | -177.23(14)    |
| N1       | C22      | C17      | C18      | -174.39(12)    | C31      | C30      | C29      | C28      | 173.81(14)     |
| N1       | C22      | C21      | C20      | 176.59(13)     | C31      | C32      | C33      | C35      | 0.2(2)         |
| N1       | C2       | C8       | C9       | -10.2(2)       | C31      | C32      | C33      | C34      | 178.14(15)     |
| N1       | C2       | C8       | C7       | 176.52(13)     | C8       | C9       | C10      | C11      | 176.87(13)     |
| N1       | C2       | C3       | C4       | -178.52(14)    | C8       | C2       | C3       | C4       | 2.5(2)         |
| C22      | N1       | C2       | C8       | -66.61(16)     | C8       | C7       | C6       | C4       | 1.7(2)         |
| C22      | N1       | C2       | C3       | 114.41(15)     | C30      | C24      | C25      | C26      | -1.9(2)        |
| C22      | C17      | C16      | C14      | 131.05(14)     | C30      | C31      | C32      | C33      | -179.01(14)    |
| C22      | C17      | C16      | C9       | -49.10(18)     | C30      | C29      | C28      | C26      | -0.5(3)        |
| C22      | C17      | C18      | C19      | -3.3(2)        | C10      | C9       | C8       | C2       | -130.11(15)    |
| C22      | C21      | C20      | C19      | -1.3(2)        | C10      | C9       | C8       | C7       | 43.0(2)        |
| C17      | C22      | C21      | C20      | -2.0(2)        | C10      | C11      | C13      | C14      | 0.3(2)         |
| C17      | C16      | C9       | C8       | 2.3(2)         | C18      | C17      | C16      | C14      | -47.85(19)     |
| C17      | C16      | C9       | C10      | -179.23(12)    | C18      | C17      | C16      | C9       | 132.00(14)     |
| C17      | C18      | C19      | C20      | 0.2(2)         | C43      | C42      | C41      | C40      | -2.6(3)        |
| C38      | C39      | C44      | N2       | -8.1(2)        | C3       | C2       | C8       | C9       | 168.80(13)     |
| C38      | C39      | C44      | C43      | 172.70(14)     | C3       | C2       | C8       | C7       | -4.5(2)        |
| C38      | C39      | C40      | C41      | -173.45(14)    | C3       | C4       | C6       | C7       | -3.7(2)        |
| C38      | C31      | C30      | C24      | -46.2(2)       | C21      | C22      | C17      | C16      | -174.72(12)    |
| C38      | C31      | C30      | C29      | 139.14(15)     | C21      | C22      | C17      | C18      | 4.21(19)       |
| C38      | C31      | C32      | C33      | 0.8(2)         | C21      | C20      | C19      | C18      | 2.2(2)         |
| C38      | C36      | C35      | C33      | -0.2(2)        | C25      | C24      | C30      | C31      | -172.62(13)    |
| C39      | C38      | C31      | C30      | -2.3(2)        | C25      | C24      | C30      | C29      | 2.2(2)         |
| C39      | C38      | C31      | C32      | 177.88(13)     | C25      | C26      | C28      | C29      | 0.8(2)         |



**Table S6** Torsion Angles for mo\_20220424LWX\_201321\_HLY\_674\_ZCS\_0m\_sq.

| <b>A</b> | <b>B</b> | <b>C</b> | <b>D</b> | <b>Angle/°</b> | <b>A</b> | <b>B</b> | <b>C</b> | <b>D</b> | <b>Angle/°</b> |
|----------|----------|----------|----------|----------------|----------|----------|----------|----------|----------------|
| C39      | C38      | C36      | C35      | -178.14(13)    | C32      | C31      | C30      | C24      | 133.59(15)     |
| C39      | C38      | C36      | C37      | 3.4(2)         | C32      | C31      | C30      | C29      | -41.1(2)       |
| C39      | C44      | C43      | C42      | 2.3(2)         | C36      | C38      | C39      | C44      | -131.13(15)    |
| C39      | C40      | C41      | C42      | -0.7(3)        | C36      | C38      | C39      | C40      | 46.8(2)        |
| C14      | C16      | C9       | C8       | -177.86(13)    | C36      | C38      | C31      | C30      | 178.27(13)     |
| C14      | C16      | C9       | C10      | 0.6(2)         | C36      | C38      | C31      | C32      | -1.5(2)        |
| C16      | C17      | C18      | C19      | 175.59(13)     | C36      | C35      | C33      | C32      | -0.5(2)        |
| C16      | C14      | C13      | C11      | -1.4(2)        | C36      | C35      | C33      | C34      | -178.41(15)    |
| C16      | C9       | C8       | C2       | 48.4(2)        | C1       | N1       | C22      | C17      | -155.17(12)    |
| C16      | C9       | C8       | C7       | -138.44(15)    | C1       | N1       | C22      | C21      | 26.24(18)      |
| C16      | C9       | C10      | C11      | -1.7(2)        | C1       | N1       | C2       | C8       | 158.91(13)     |
| C9       | C8       | C7       | C6       | -170.90(14)    | C1       | N1       | C2       | C3       | -20.07(19)     |
| C9       | C10      | C11      | C13      | 1.2(2)         | C13      | C14      | C16      | C17      | -179.29(13)    |
| C9       | C10      | C11      | C12      | -176.76(15)    | C13      | C14      | C16      | C9       | 0.9(2)         |
| C2       | N1       | C22      | C17      | 70.09(16)      | C40      | C39      | C44      | N2       | 173.88(13)     |
| C2       | N1       | C22      | C21      | -108.50(14)    | C40      | C39      | C44      | C43      | -5.3(2)        |
| C2       | C8       | C7       | C6       | 2.5(2)         | C23      | N2       | C44      | C39      | 155.52(14)     |
| C2       | C3       | C4       | C6       | 1.6(2)         | C23      | N2       | C44      | C43      | -25.3(2)       |
| C2       | C3       | C4       | C5       | -177.91(15)    | C23      | N2       | C24      | C30      | -156.07(14)    |
| C44      | N2       | C24      | C30      | 68.57(16)      | C23      | N2       | C24      | C25      | 23.5(2)        |
| C44      | N2       | C24      | C25      | -111.84(15)    | C15      | C14      | C16      | C17      | 0.1(2)         |
| C44      | C39      | C40      | C41      | 4.6(2)         | C15      | C14      | C16      | C9       | -179.72(13)    |
| C44      | C43      | C42      | C41      | 1.8(2)         | C15      | C14      | C13      | C11      | 179.16(14)     |
| C24      | N2       | C44      | C39      | -69.01(16)     | C37      | C36      | C35      | C33      | 178.34(15)     |
| C24      | N2       | C44      | C43      | 110.17(15)     | C12      | C11      | C13      | C14      | 178.32(14)     |
| C24      | C30      | C29      | C28      | -1.1(2)        | C27      | C26      | C28      | C29      | -179.92(16)    |
| C24      | C25      | C26      | C28      | 0.3(2)         | C5       | C4       | C6       | C7       | 175.82(16)     |

**Table S7 Hydrogen Atom Coordinates ( $\text{\AA}\times 10^4$ ) and Isotropic Displacement Parameters ( $\text{\AA}^2\times 10^3$ ) for mo\_20220424LWX\_201321\_HLY\_674\_ZCS\_0m\_sq.**

| Atom | x        | y        | z       | U(eq) |
|------|----------|----------|---------|-------|
| H10  | 6793.14  | 10433.51 | 2246.3  | 32    |
| H18  | 4341.89  | 8913.61  | -43.49  | 33    |
| H43  | -2475.12 | 6340.16  | 1811.27 | 36    |
| H3   | 2368.41  | 7870.37  | 3422.91 | 34    |
| H21  | 2516.62  | 6373.2   | 1868.48 | 33    |
| H25  | -2022.29 | 5881.43  | 3791.55 | 35    |
| H7   | 3845.59  | 11289.64 | 2254.78 | 35    |
| H32  | 4467.31  | 3093.43  | 3834    | 37    |
| H20  | 1606.08  | 6594.45  | 683.65  | 38    |
| H1A  | 3292.11  | 6290.56  | 2941.84 | 45    |
| H1B  | 4932.23  | 6302.32  | 3327.14 | 45    |
| H1C  | 5065.18  | 5631.05  | 2656.94 | 45    |
| H13  | 9495.83  | 9247.31  | 564.6   | 34    |
| H40  | 1401.17  | 3007.34  | 1254.61 | 38    |
| H35  | 6616.91  | 3090.15  | 1854.58 | 41    |
| H6   | 1861.01  | 11393.25 | 3181.07 | 39    |
| H29  | 2137.92  | 2366.9   | 4258.07 | 39    |
| H42  | -2964.53 | 5453.14  | 870.98  | 43    |
| H23A | -600.35  | 7453.48  | 2200.21 | 49    |
| H23B | -421.12  | 7253.6   | 3065.46 | 49    |
| H23C | -1989.73 | 7033     | 2728.84 | 49    |
| H19  | 2460.66  | 7905.48  | -264.38 | 37    |
| H41  | -1065.32 | 3752.18  | 620.1   | 44    |
| H15A | 7226.38  | 7429.17  | 189.54  | 51    |
| H15B | 8869.7   | 7868.94  | -5.26   | 51    |
| H15C | 7146.43  | 8661.84  | -355.22 | 51    |
| H28  | 25.26    | 2762.17  | 5101.37 | 45    |
| H37A | 4176.95  | 3131.1   | 815.78  | 60    |

**Table S7 Hydrogen Atom Coordinates ( $\text{\AA}\times 10^4$ ) and Isotropic Displacement Parameters ( $\text{\AA}^2\times 10^3$ ) for mo\_20220424LWX\_201321\_HLY\_674\_ZCS\_0m\_sq.**

| <b>Atom</b> | <b>x</b>  | <b>y</b>  | <b>z</b> | <b>U(eq)</b> |
|-------------|-----------|-----------|----------|--------------|
| H37B        | 5098.65   | 4151.21   | 795.68   | 60           |
| H37C        | 3123.45   | 4469.95   | 802.07   | 60           |
| H12A        | 10234.54  | 10741.35  | 1119.24  | 60           |
| H12B        | 10520.51  | 9889.41   | 1902.88  | 60           |
| H12C        | 9211.72   | 11159.76  | 1813.14  | 60           |
| H27A        | -3237.42  | 4043.36   | 5137.92  | 73           |
| H27B        | -3315.65  | 5425.6    | 4922.47  | 73           |
| H27C        | -2122.78  | 4593.57   | 5559.95  | 73           |
| H5A         | 414.86    | 10482.35  | 4153.22  | 76           |
| H5B         | 1324.97   | 9134.47   | 4488.51  | 76           |
| H5C         | -190.72   | 9424.58   | 3946.39  | 76           |
| H34A        | 8114.84   | 1858.17   | 3092.18  | 81           |
| H34B        | 7372.52   | 2461.01   | 3774.48  | 81           |
| H34C        | 8104.78   | 3204.83   | 3085.82  | 81           |
| H12D        | 9520(50)  | 11290(20) | 1300(20) | 38(12)       |
| H12E        | 10800(30) | 10090(40) | 1390(20) | 33(11)       |
| H12F        | 9810(60)  | 10370(40) | 2099(11) | 41(13)       |

**Table S8 Atomic Occupancy for mo\_20220424LWX\_201321\_HLY\_674\_ZCS\_0m\_sq.**

| <b>Atom</b> | <b>Occupancy</b> | <b>Atom</b> | <b>Occupancy</b> | <b>Atom</b> | <b>Occupancy</b> |
|-------------|------------------|-------------|------------------|-------------|------------------|
| H12A        | 0.53(3)          | H12B        | 0.53(3)          | H12C        | 0.53(3)          |
| H12D        | 0.47(3)          | H12E        | 0.47(3)          | H12F        | 0.47(3)          |

## VII. Experimental data for the described substances

### 9-methyl-9H-tribenzo[*b,d,f*]azepine (3a)<sup>[11]</sup>

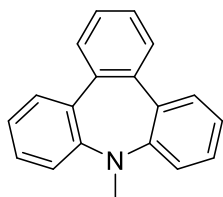

A white solid (50 mg, 97% yield), purification via a silica (200-300 mesh) gel column (petroleum ether/EtOAc = 80/1, v/v). **<sup>1</sup>H NMR (500 MHz, CDCl<sub>3</sub>):**  $\delta$  = 7.50–7.46 (m, 6H), 7.32 (t,  $J$  = 7.5 Hz, 2H), 7.20 (d,  $J$  = 8.0 Hz, 2H), 7.15 (t,  $J$  = 7.0 Hz, 2H), 3.31(s, 3H) ppm. **<sup>13</sup>C NMR (125 MHz, CDCl<sub>3</sub>)**  $\delta$  = 154.47, 139.79, 134.85, 129.91, 129.68, 128.32, 127.70, 124.11, 117.41, 37.99 ppm.

### 8-bromo-9-methyl-9H-tribenzo[*b,d,f*]azepine (3b)

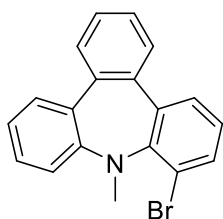

A white solid (40 mg, 60% yield), purification via a silica (200-300 mesh) gel column (petroleum ether, v). M.p.: 55.5–57.5 °C. **<sup>1</sup>H NMR (500 MHz, CDCl<sub>3</sub>):**  $\delta$  = 7.60–7.57 (m, 3H), 7.54 (d,  $J$  = 7.5 Hz, 2H), 7.50–7.46 (m, 2H), 7.43 (d,  $J$  = 7.5 Hz, 1H), 7.36 (t,  $J$  = 7.5 Hz, 1H), 7.26–7.23 (m, 1H), 7.08 (t,  $J$  = 7.8 Hz, 1H), 3.16 (s, 3H) ppm. **<sup>13</sup>C NMR (125 MHz, CDCl<sub>3</sub>):**  $\delta$  = 152.60, 149.34, 141.86, 138.98, 138.54, 137.70, 133.00, 130.06, 129.91, 129.61, 129.58, 128.78, 128.05, 127.55, 127.00, 126.25, 125.98, 123.00, 40.30 ppm. **HRMS (ESI)  $m/z$ :** calcd for C<sub>19</sub>H<sub>15</sub>Br (M+H) 336.0388, found 336.0340.

### 9-methyl-7-nitro-9H-tribenzo[*b,d,f*]azepine (3c)

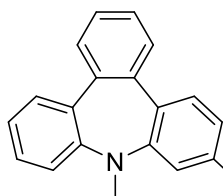

A yellow solid (57 mg, 95% yield), purification via a silica (200-300 mesh) gel column (petroleum ether/EtOAc = 50/1, v/v).. M.p.: 79.4–81.4 °C. **<sup>1</sup>H NMR (500 MHz, CDCl<sub>3</sub>):**  $\delta$  = 8.02–7.98 (m, 2H), 7.57 (d,  $J$  = 8.5 Hz, 1H), 7.54–7.52 (m, 2H), 7.50–7.45 (m, 3H), 7.38–7.34 (m, 1H), 7.24–7.18 (m, 2H), 3.36 (s, 3H) ppm. **<sup>13</sup>C NMR (125 MHz, CDCl<sub>3</sub>):**  $\delta$  = 155.13, 153.23, 148.08, 141.78, 140.09, 137.83, 134.31, 130.30, 130.10, 130.04, 129.91, 129.21, 128.88, 128.01, 124.96, 119.07, 117.93, 112.53, 38.20 ppm. **HRMS (ESI)  $m/z$ :** calcd for C<sub>19</sub>H<sub>15</sub>N<sub>2</sub>O<sub>2</sub> (M+H) 303.1134, found 303.1132.

### 7-fluoro-9-methyl-9H-tribenzo[*b,d,f*]azepine (3d)

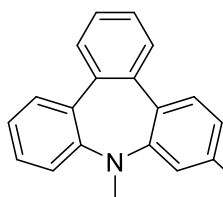

A white solid (42 mg, 76% yield), purification via a silica (200-300 mesh) gel column (petroleum ether/EtOAc = 50/1, v/v).. M.p.: 154.6–156.6 °C. **<sup>1</sup>H NMR (500 MHz, CDCl<sub>3</sub>):**  $\delta$  = 7.49–7.38 (m, 6H), 7.32 (t,  $J$  = 7.8 Hz, 1H), 7.19–7.15 (m, 2H), 6.90 (d,  $J$  = 10.5 Hz, 1H), 6.85 (t,  $J$  = 8.0 Hz, 1H), 3.27 (s, 3H) ppm. **<sup>13</sup>C NMR (125 MHz, CDCl<sub>3</sub>)**  $\delta$  = 163.55 (d,  $J_{C-F}$  = 245.8 Hz), 155.96 (d,  $J_{C-F}$  = 8.13 Hz), 153.83, 139.50, 138.99, 134.85, 130.79, 130.75 (d,  $J_{C-F}$  = 9.6 Hz), 130.01, 129.70, 129.60, 128.42, 127.8 (d,  $J_{C-F}$  = 5.6

Hz), 124.49, 117.57, 110.86 (d,  $J_{C-F} = 21.1$  Hz), 105.15 (d,  $J_{C-F} = 22.9$  Hz), 38.04 ppm. **HRMS (ESI)**  $m/z$ : calcd for  $C_{19}H_{15}FN$  (M+H) 276.1189, found 276.1188.

### 7-bromo-9-methyl-9H-tribenzo[*b,d,f*]azepine (3e)

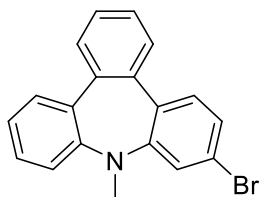

A white solid (62 mg, 92% yield), purification via a silica (200-300 mesh) gel column (petroleum ether/EtOAc = 60/1, v/v).. M.p.: 141.2–143.2 °C.  **$^1H$  NMR (500 MHz,  $CDCl_3$ ):**  $\delta = 7.50$ – $7.43$  (m, 5H),  $7.35$ – $7.27$  (m, 4H),  $7.20$ – $7.15$  (m, 2H),  $3.28$  (s, 3H) ppm.  **$^{13}C$  NMR (125 MHz,  $CDCl_3$ ):**  $\delta = 155.48, 153.81, 139.66, 138.79, 134.72, 133.87, 130.94, 130.00, 129.75, 129.50, 128.51, 128.06, 127.84, 127.16, 124.53, 122.65, 121.01, 117.68, 38.07$  ppm. **HRMS (ESI)**  $m/z$ : calcd for  $C_{19}H_{15}BrN$  (M+H) 336.0388, found 336.0385.

### 6-chloro-9-methyl-9H-tribenzo[*b,d,f*]azepine (3f)

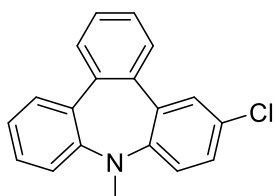

A white solid (38 mg, 65% yield), purification via a silica (200-300 mesh) gel column (petroleum ether/EtOAc = 60/1, v/v).. M.p.: 133.8–135.8 °C.  **$^1H$  NMR (500 MHz,  $CDCl_3$ ):**  $\delta = 7.49$ – $7.44$  (m, 5H),  $7.42$  (d,  $J = 2.5$  Hz, 1H),  $7.34$ – $7.31$  (m, 1H),  $7.27$ – $7.25$  (m, 1H),  $7.19$ – $7.14$  (m, 2H),  $7.11$  (d,  $J = 8.5$  Hz, 1H),  $3.27$  (s, 3H) ppm.  **$^{13}C$  NMR (125 MHz,  $CDCl_3$ ):**  $\delta = 154.08, 153.01, 139.84, 138.52, 136.49, 134.62, 130.00, 129.77, 129.60, 129.53, 129.22, 128.51, 128.25, 127.99, 127.85, 124.41, 118.65, 117.48, 38.07$  ppm. **HRMS (ESI)**  $m/z$ : calcd for  $C_{20}H_{18}NO$  (M+H) 288.1388, found 288.1385.

### 9-methyl-6-nitro-9H-tribenzo[*b,d,f*]azepine (3g)

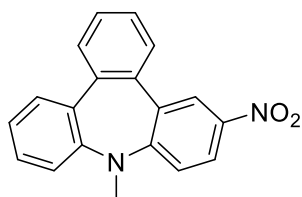

A white solid (52 mg, 86% yield), purification via a silica (200-300 mesh) gel column (petroleum ether/EtOAc = 60/1, v/v).. M.p.: 68.8–70.8 °C.  **$^1H$  NMR (500 MHz,  $CDCl_3$ ):**  $\delta = 8.34$  (d,  $J = 2.5$  Hz, 1H),  $8.18$  (dd,  $J = 9.0$  Hz,  $2.5$  Hz, 1H),  $7.52$ – $7.46$  (m, 5H),  $7.37$ – $7.34$  (m, 1H),  $7.24$ – $7.19$  (m, 3H),  $3.36$  (s, 3H) ppm.  **$^{13}C$  NMR (125 MHz,  $CDCl_3$ ):**  $\delta = 160.54, 152.66, 144.04, 139.69, 137.89, 135.49, 134.45, 130.22, 130.19, 129.71, 128.91, 128.77, 128.20, 125.25, 125.17, 123.73, 118.35, 117.60, 38.48$  ppm. **HRMS (ESI)**  $m/z$ : calcd for  $C_{19}H_{15}N_2O_2$  (M+H) 303.1134, found 303.1133.

### 6-methoxy-9-methyl-9H-tribenzo[*b,d,f*]azepine (3h)

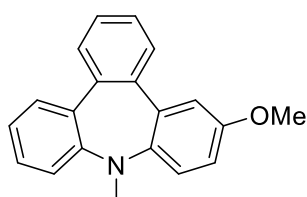

A white solid (30 mg, 52% yield), purification via a silica (200-300 mesh) gel column (petroleum ether/EtOAc = 60/1, v/v). M.p.: 128.4–130.4 °C.  **$^1H$  NMR (500 MHz,  $CDCl_3$ ):**  $\delta = 7.54$ – $7.44$  (m, 5H),  $7.31$  (t,  $J = 7.5$  Hz, 1H),  $7.18$  (d,  $J = 8.0$  Hz, 1H),  $7.14$ – $7.11$  (m, 2H),  $7.00$  (d,  $J = 2.0$  Hz),  $6.86$  (dd,  $J = 8.8$  Hz,  $1.8$  Hz, 1H),  $3.80$  (s, 3H),  $3.26$  (s, 3H) ppm.  **$^{13}C$  NMR (125 MHz,  $CDCl_3$ ):**  $\delta = 156.22, 154.88, 147.83,$

139.93, 139.58, 135.90, 134.74, 129.93, 129.83, 129.39, 128.36, 127.83, 127.70, 123.96, 118.14, 117.03, 115.14, 113.51, 55.73, 38.08 ppm. **HRMS (ESI)  $m/z$ :** calcd for  $C_{20}H_{18}NO$  (M+H) 288.1388, found 288.1385.

### 6,7-dimethoxy-9-methyl-9H-tribenzo[*b,d,f*]azepine(3i)

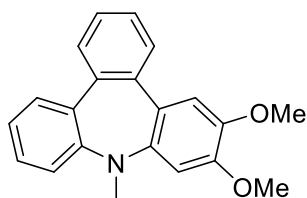

A white solid (33 mg, 54% yield), purification via a silica (200-300 mesh) gel column (petroleum ether/EtOAc = 80/1, v/v). M.p.: 139.1–141.1 °C.  **$^1H$  NMR (500 MHz,  $CDCl_3$ ):**  $\delta$  = 7.49–7.41 (m, 5H), 7.31 (t,  $J$  = 7.25 Hz, 1H), 7.18 (d,  $J$  = 8.0 Hz, 1H), 7.13 (t,  $J$  = 7.3 Hz, 1H), 6.96 (s, 1H), 6.77 (s, 1H), 3.92 (s, 3H), 3.88 (s, 3H), 3.28 (s, 3H) ppm.  **$^{13}C$  NMR (125 MHz,  $CDCl_3$ )**  $\delta$  = 155.06, 149.42, 147.58, 145.58, 139.74, 139.61, 134.99, 129.97, 129.85, 129.00, 128.25, 127.68, 127.25, 126.70, 124.10, 117.10, 112.83, 101.97, 56.43, 56.21, 38.03 ppm. **HRMS (ESI)  $m/z$ :** calcd for  $C_{21}H_{20}NO_2$  (M+H) 318.3960, found 318.3961.

### 9-phenyl-9H-tribenzo[*b,d,f*]azepine (3j)<sup>[11]</sup>

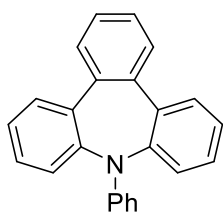

A white solid (40 mg, 63% yield), purification via a silica (200-300 mesh) gel column (petroleum ether, v).  **$^1H$  NMR (500 MHz,  $CDCl_3$ ):**  $\delta$  = 7.66 (d,  $J$  = 7.5 Hz, 2H), 7.61–7.55 (m, 4H), 7.46 (t,  $J$  = 7.5 Hz, 2H), 7.40–7.38 (m, 4H), 6.98 (t,  $J$  = 8.0 Hz, 2H), 6.62–6.55 (m, 3H) ppm.  **$^{13}C$  NMR (125 MHz,  $CDCl_3$ ):**  $\delta$  = 147.48, 146.11, 139.22, 137.78, 131.07, 129.51, 129.09, 128.86, 128.74, 127.86, 127.49, 117.56, 111.87 ppm.

### ethyl 2-(9H-tribenzo[*b,d,f*]azepin-9-yl)acetate (3k)

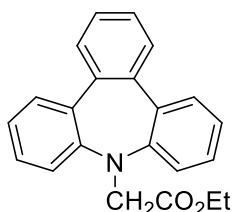

A white solid (54 mg, 82% yield), purification via a silica (200-300 mesh) gel column (petroleum ether/EtOAc = 80/1, v/v). M.p.: 70.3–72.3 °C.  **$^1H$  NMR (500 MHz,  $CDCl_3$ ):**  $\delta$  = 7.54–7.52 (m, 2H), 7.49–7.44 (m, 4H), 7.29 (td,  $J$  = 8.0 Hz, 1.3 Hz, 2H), 7.17–7.11 (m, 4H), 4.54 (s, 2H), 3.98 (q,  $J$  = 7.17 Hz, 2H), 0.98 (t,  $J$  = 7.25 Hz, 3H) ppm.  **$^{13}C$  NMR (125 MHz,  $CDCl_3$ ):**  $\delta$  = 169.44, 152.54, 139.53, 135.85, 130.15, 129.53, 128.38, 127.66, 124.75, 118.19, 60.89, 52.39, 13.96 ppm. **HRMS (ESI)  $m/z$ :** calcd for  $C_{22}H_{20}NO_2$  (M+H) 330.1494, found 330.1495.

### 2,12-dimethoxy-9-methyl-9H-tribenzo[*b,d,f*]azepine (4a)

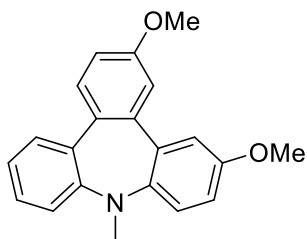

A white solid (26 mg, 41% yield), purification via a silica (200-300 mesh) gel column (petroleum ether/EtOAc = 80/1, v/v). M.p.: 56.3–58.3 °C. **<sup>1</sup>H NMR (500 MHz, CDCl<sub>3</sub>):**  $\delta$  = 7.43–7.40 (m, 2H), 7.29–7.27 (m, 1H), 7.16 (d,  $J$  = 8.0 Hz, 1H), 7.13–7.09 (m, 2H), 7.05 (d,  $J$  = 2.5 Hz, 1H), 7.03–7.00 (m, 2H), 6.86 (dd,  $J$  = 9.0 Hz, 3.0 Hz, 1H), 3.90 (s, 3H), 3.80 (s, 3H), 3.26 (s, 3H) ppm.

**<sup>13</sup>C NMR (125 MHz, CDCl<sub>3</sub>):**  $\delta$  = 159.10, 156.18, 154.24, 147.63, 140.64, 135.91, 134.48, 132.63, 131.11, 129.52, 127.82, 123.92, 118.25, 116.96, 115.17, 114.26, 114.02, 113.59, 55.76, 55.61, 38.16 ppm. **HRMS (ESI)  $m/z$ :** calcd for C<sub>21</sub>H<sub>20</sub>NO<sub>2</sub> (M+H) 318.1494, found 318.1492.

### 2,7,9-trimethyl-9H-tribenzo[*b,d,f*]azepine (4b)

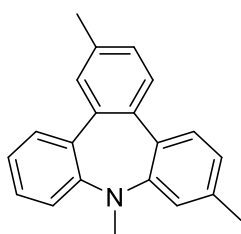

A white solid (47 mg, 87% yield), purification via a silica (200-300 mesh) gel column (petroleum ether/EtOAc = 80/1, v/v). M.p.: 133.3–135.3 °C. **<sup>1</sup>H NMR (500 MHz, CDCl<sub>3</sub>):**  $\delta$  = 7.44 (dd,  $J$  = 7.5 Hz, 1.5 Hz, 1H), 7.38 (d,  $J$  = 8.0 Hz, 1H), 7.33 (d,  $J$  = 7.5 Hz, 1H), 7.31–7.24 (m, 3H, cover the solvent), 7.20–7.17 (m, 1H), 7.12 (td,  $J$  = 7.5 Hz, 1.0 Hz, 1H), 6.99 (s, 1H), 6.94 (d,  $J$  = 8.0 Hz, 1H), 3.23 (s,

3H), 2.45 (s, 3H), 2.36 (s, 3H) ppm. **<sup>13</sup>C NMR (125 MHz, CDCl<sub>3</sub>):**  $\delta$  = 154.41, 154.11, 139.45, 138.02, 137.13, 136.97, 135.04, 131.95, 130.29, 129.87, 129.44, 129.41, 128.60, 128.21, 124.85, 123.99, 118.17, 117.34, 38.04, 21.41, 21.37 ppm. **HRMS (ESI)  $m/z$ :** calcd for C<sub>21</sub>H<sub>20</sub> (M+H) 286.1596, found 286.1599.

### 2,7-dichloro-9-methyl-9H-tribenzo[*b,d,f*]azepine (4c)

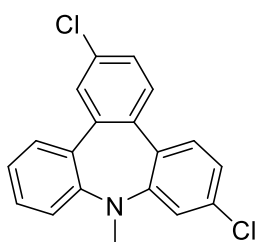

A white solid (45 mg, 69% yield), purification via a silica (200-300 mesh) gel column (petroleum ether, v). M.p.: 50.5–52.5 °C. **<sup>1</sup>H NMR (500 MHz, CDCl<sub>3</sub>):**  $\delta$  = 7.47 (d,  $J$  = 2.0 Hz, 1H), 7.41 (t,  $J$  = 8.3 Hz, 2H), 7.36–7.34 (m, 2H), 7.31 (d,  $J$  = 8.0 Hz, 1H), 7.20–7.15 (m, 3H), 7.11 (dd,  $J$  = 8.3 Hz, 1.8 Hz, 1H), 3.27 (s, 3H) ppm. **<sup>13</sup>C NMR (125 MHz, CDCl<sub>3</sub>):**  $\delta$  = 155.16, 153.74, 141.20, 137.24, 134.82,

133.80, 133.56, 132.37, 130.86, 130.46, 129.90, 129.44, 129.09, 127.80, 124.71, 124.36, 118.28, 117.86, 38.00 ppm. **HRMS (ESI)  $m/z$ :** calcd for C<sub>19</sub>H<sub>14</sub>Cl<sub>2</sub>N (M+H) 326.0503, found 326.0500.

### 1,9,13-trimethyl-9H-tribenzo[*b,d,f*]azepine (4d)

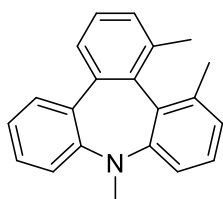

A white solid (24 mg, 42% yield), purification via a silica (200-300 mesh) gel column (petroleum ether/EtOAc = 80/1, v/v). M.p.: 92.3–94.3 °C. **<sup>1</sup>H NMR (500 MHz, CDCl<sub>3</sub>):**  $\delta$  = 7.58 (d,  $J$  = 7.5 Hz, 1H), 7.34–7.31 (m, 1H), 7.28–7.23 (m, 3H, cover the solvent), 7.16–7.06 (m, 4H), 6.95 (d,  $J$  = 7.5 Hz, 1H), 3.23 (s, 3H), 2.20 (s,

3H), 2.10 (s, 3H) ppm. **<sup>13</sup>C NMR (125 MHz, CDCl<sub>3</sub>)**  $\delta$  = 156.75, 154.69, 140.56, 138.50, 138.43,

136.32, 135.29, 131.85, 128.96, 128.78, 127.84, 127.29, 127.27, 126.98, 125.97, 123.64, 116.52, 113.93, 37.37, 20.18, 20.14 ppm. **HRMS (ESI)  $m/z$** : calcd for  $C_{21}H_{20}N$  ( $M+H$ ) 286.1596, found 286.1599.

#### 2,7,9-trimethyl-12-nitro-9H-tribenzo[*b,d,f*]azepine (4e)

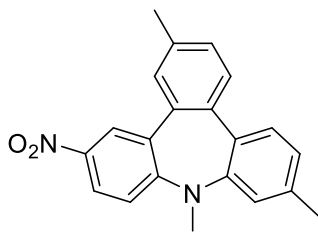

A yellow solid (45 mg, 68% yield), purification via a silica (200-300 mesh) gel column (petroleum ether/EtOAc = 80/1, v/v). M.p.: 121.1–123.1 °C.  **$^1H$  NMR (500 MHz,  $CDCl_3$ )**:  $\delta$  = 8.32 (d,  $J$  = 2.5 Hz, 1H), 8.16 (dd,  $J$  = 8.8 Hz, 2.8 Hz, 1H), 7.40–7.38 (m, 1H), 7.34–7.31 (m, 2H), 7.22 (d,  $J$  = 9.0 Hz, 1H), 7.01–6.99 (m, 2H), 3.34 (s, 3H), 2.47 (s, 3H), 2.37 (s, 3H) ppm.  **$^{13}C$  NMR (125 MHz,  $CDCl_3$ )**:  $\delta$  = 160.51, 152.27, 143.94, 138.60, 137.84, 137.50, 136.82, 135.71, 131.48, 130.75, 129.80, 129.73, 129.44, 125.92, 125.20, 123.63, 119.06, 117.54, 38.54, 21.37, 21.31 ppm. **HRMS (ESI)  $m/z$** : calcd for  $C_{21}H_{19}N_2O_2$  ( $M+H$ ) 331.1447, found 331.1445.

#### 7-chloro-1,3,9-trimethyl-9H-tribenzo[*b,d,f*]azepine (4f)

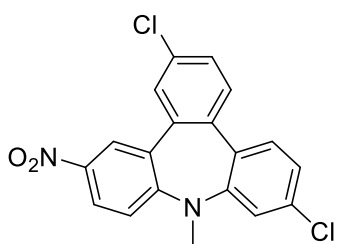

A yellow solid (24 mg, 32% yield), purification via a silica (200-300 mesh) gel column (petroleum ether/EtOAc = 80/1, v/v). M.p.: 71.7–73.7 °C.  **$^1H$  NMR (500 MHz,  $CDCl_3$ )**:  $\delta$  = 8.30 (d,  $J$  = 2.5 Hz, 1H), 8.22 (dd,  $J$  = 8.5 Hz, 2.3 Hz, 1H), 7.48–7.46 (m, 2H), 7.38 (d,  $J$  = 8.0 Hz, 1H), 7.34 (d,  $J$  = 8.5 Hz, 1H), 7.26–7.25 (m, 1H, cover the solvent), 7.19–7.17 (m, 2H), 3.33 (s, 3H) ppm.  **$^{13}C$  NMR (125 MHz,  $CDCl_3$ )**:  $\delta$  = 159.67, 153.32, 144.40, 139.17, 137.12, 135.31, 134.42, 134.27, 131.93, 130.94, 130.75, 129.91, 129.06, 125.45, 125.22, 124.35, 119.17, 118.24, 38.49 ppm. **HRMS (ESI)  $m/z$** : calcd for  $C_{19}H_{13}Cl_2N_2O_2$  ( $M+H$ ) 371.0354, found 371.0355.

#### 7,9-dimethyl-2-(trifluoromethyl)-9H-tribenzo[*b,d,f*]azepine and 2,9-dimethyl-7-(trifluoromethyl)-9H-tribenzo[*b,d,f*]azepine (4g and 4g')

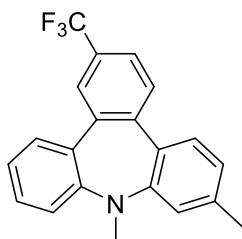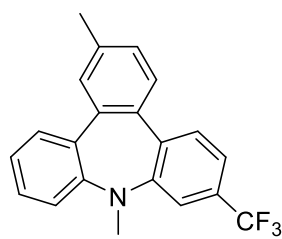

An yellow oil (36 mg, with a ratio of 1/2) purification via a silica (200-300 mesh) gel column (petroleum ether, v).  **$^1H$  NMR (500 MHz,  $CDCl_3$ )**:  $\delta$  = 7.74 (s, 1.5H), 7.68 (d,  $J$  = 8.5 Hz, 1.5H), 7.60–7.55 (m, 2.5H), 7.48 (t,  $J$  = 8.0 Hz, 2.2H), 7.41–7.35 (m, 5.7H), 7.31 (d,  $J$  = 8.0 Hz, 1.2H), 7.25–7.22 (m, 2H), 7.20–7.17 (m, 1.7H), 7.04 (s, 1.2H), 7.00 (d,  $J$  = 8.0 Hz, 1H) 3.35 (s, 1.5H), 3.32 (s, 3H), 2.50 (s, 1.5H), 2.40 (s, 3H) ppm.  **$^{13}C$  NMR (125 MHz,  $CDCl_3$ )**:  $\delta$  = 154.67, 154.42, 153.65, 143.32, 140.27, 139.70, 139.36, 138.46, 135.72, 134.60, 133.78, 130.62 (q,  $J_{C-F}$  = 35.0 Hz), 130.00, 129.94, 129.89, 129.83, 129.78, 129.49, 129.24, 128.82, 128.58, 126.48 (q,  $J_{C-F}$  = 3.7 Hz), 125.53, 125.19, 124.56, 124.41, 124.09 (q,  $J_{C-F}$  = 3.5 Hz), 123.37, 120.73 (d,  $J_{C-F}$  = 3.8 Hz), 118.52,



117.72, 117.61, 114.27 (q,  $J_{C-F} = 3.8$  Hz), 114.25, 38.10, 37.89, 21.46, 21.44 ppm. **HRMS (ESI)  $m/z$ :** calcd for  $C_{21}H_{17}F_3N$  (M+H) 340.1313, found 340.1312.

#### 1,3,9-trimethyl-9H-tribenzo[*b,d,f*]azepine (4h)

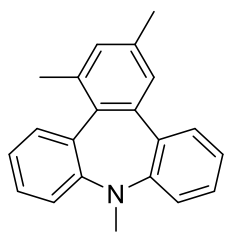

A white solid (50 mg, 84% yield), purification via a silica (200-300 mesh) gel column (petroleum ether, v). M.p.: 164.3–166.3 °C.  **$^1H$  NMR (500 MHz,  $CDCl_3$ ):**  $\delta = 7.52$  (d,  $J = 7.5$  Hz, 1H), 7.29 (d,  $J = 8.0$  Hz, 1H), 7.26–7.23 (m, 3H, cover the solvent), 7.16–7.05 (m, 5H), 3.27 (s, 3H), 2.42 (s, 3H), 2.38 (s, 3H) ppm.  **$^{13}C$  NMR (125 MHz,  $CDCl_3$ ):**  $\delta = 155.22, 154.69, 140.49, 136.83, 136.02, 135.58, 134.95, 132.52, 132.20, 131.34, 129.64, 128.53, 127.99, 127.64, 123.71, 122.98, 117.26, 116.25, 37.34, 21.93, 21.31$  ppm. **HRMS (ESI)  $m/z$ :** calcd for  $C_{21}H_{20}N$  (M+H) 286.1596, found 286.1595.

#### 7-chloro-1,3,9-trimethyl-9H-tribenzo[*b,d,f*]azepine (4i)

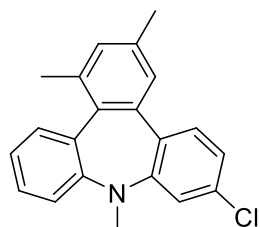

A white solid (20 mg, 31% yield), purification via a silica (200-300 mesh) gel column (petroleum ether, v). M.p.: 173.1–175.1 °C.  **$^1H$  NMR (500 MHz,  $CDCl_3$ ):**  $\delta = 7.42$  (dd,  $J = 8.0$  Hz,  $J = 2.5$  Hz, 1H), 7.29–7.23 (m, 3H, cover the solvent), 7.17 (s, 1H), 7.17–7.07 (m, 4H), 3.24 (s, 3H), 2.41 (s, 3H), 2.36 (s, 3H) ppm.  **$^{13}C$  NMR (125 MHz,  $CDCl_3$ ):**  $\delta = 155.54, 154.50, 139.46, 137.02, 135.86, 135.76, 134.01, 133.46, 132.41, 132.24, 131.63, 130.43, 128.34, 127.82, 123.80, 123.41, 117.48, 116.96, 37.38, 21.87, 21.30$  ppm. **HRMS (ESI)  $m/z$ :** calcd for  $C_{21}H_{19}ClN$  (M+H) 320.1206, found 320.1201.

#### 1,3,7,9-tetramethyl-9H-tribenzo[*b,d,f*]azepine (4j)

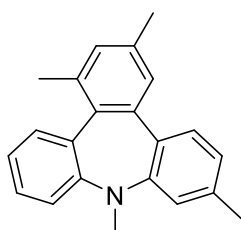

A white solid (30 mg, 50% yield), purification via a silica (200-300 mesh) gel column (petroleum ether, v). M.p.: 173.8–175.8 °C.  **$^1H$  NMR (500 MHz,  $CDCl_3$ ):**  $\delta = 7.40$  (d,  $J = 8.0$  Hz, 1H), 7.29–7.24 (m, 3H, cover the solvent), 7.15 (s, 1H), 7.12 (s, 1H), 7.01–7.05 (m, 1H), 6.95 (s, 1H), 6.92 (d,  $J = 7.5$  Hz), 3.26 (s, 3H), 2.41 (s, 3H), 2.37 (s, 3H), 2.35 (s, 3H) ppm.  **$^{13}C$  NMR (125 MHz,  $CDCl_3$ ):**  $\delta = 155.20, 154.52, 140.41, 137.94, 136.80, 135.87, 135.56, 132.57, 132.20, 132.02, 131.11, 129.40, 128.28, 127.58, 124.50, 122.93, 117.17, 117.06, 37.33, 21.96, 21.47, 21.32$  ppm. **HRMS (ESI)  $m/z$ :** calcd for  $C_{22}H_{22}N$  (M+H) 300.1752, found 300.1750.

## VIII. References

[1] G. Beutner, J. Kuethe and N. Yasuda, A Practical Method for Preparation of 4-Hydroxyquinolinone Esters, *J. Org. Chem.* 2007, **72**, 7058–7061.

- [2] A. D'Souza, N. Spiccia, J. Basutto, P. Jokisz, L. Wong, A. Meyer, A. Holmes, J. White and J. Ryan, 1,3-Dipolar Cycloaddition–Decarboxylation Reactions of an Azomethine Ylide with Isatoic Anhydrides: Formation of Novel Benzodiazepinones, *Org. Lett.* 2011, **13**, 486–489.
- [3] A. Lee, J. Zhu, T. Feoktistova, A. Brueckner, P. Cheong and K. Scheidt, Carbene-Catalyzed Enantioselective Decarboxylative Annulations to Access Dihydrobenzoxazinones and Quinolones, *Angew. Chem., Int. Ed.*, 2019, **58**, 5941–5945.
- [4] S. Ursuegui, N. Chivot, S. Moutin, A. Burr, C. Fossey, T. Cailly, A. Laayoun, F. Fabis and A. Laurent, Biotin-conjugated N-methylisatoic anhydride: a chemical tool for nucleic acid separation by selective 2'-hydroxyl acylation of RNA, *Chem. Commun.*, 2014, **50**, 5748–5751.
- [5] G. M. Coppola, N-Arylation of Isatins. A Direct Route to N-arylisatoic Anhydrides, *J. Heterocycl. Chem.*, 1987, **24**, 1249–1251.
- [6] R. Clark, C. Clements, M. Barrett, S. Mackay, R. Rathnam, G. Owusu-Dapaah, J. Spencer and J. Huggan, Identification and development of the 1,4-benzodiazepin-2-one and quinazoline-2,4-dione scaffolds as submicromolar inhibitors of HAT, *Bioorg. Med. Chem.*, 2012, **20**, 6019–6033.
- [7] R. Xie, H. Lv, X. Ye, X. Kong and S. Li, Cu-Catalyzed Tandem N-arylation of Phthalhydrazides with Cyclic Iodoniums to Yield Dihydrobenzo[*c*]cinnolines, *Org. Biomol. Chem.*, 2020, **18**, 4824–4830.
- [8] S. Yang, F. Wang, Y. Wu, W. Hua and F. Zhang, Synthesis of Functionalized Triphenylenes via a Traceless Directing Group Strategy, *Org. Lett.*, 2018, **20**, 1491–1495.
- [9] B. Wu and Yoshikai, N. Conversion of 2-Iodobiaryls into 2,2'-Diiodobiaryls via Oxidation-Iodination Sequences: A Versatile Route to Ladder-Type Heterofluorenes, *Angew. Chem.*, 2015, **127**, 8860–8863.
- [10] M. Ding, W. Hua, M. Liu and F. Zhang, Pd-Catalyzed C(sp<sup>3</sup>)–H Biarylation via Transient Directing Group Strategy, *Org. Lett.*, 2020, **22**, 7419–7423.
- [11] C. Cheng, D. Tu, X. Zuo, Z. Wu, B. Wan and Y. Zhang, Palladium-Catalyzed Dual Coupling Reaction of 2-Iodobiphenyls with o-Bromoanilines through C–H Activation: An Approach for the Synthesis of Tribenzo[*b,d,f*]azepines, *Org. Lett.*, 2021, **23**, 1239–1242.

## IX. Copies of $^1\text{H}$ and $^{13}\text{C}$ NMR spectra

### $^1\text{H}$ NMR (500 MHz, $\text{CDCl}_3$ ) of **1b**

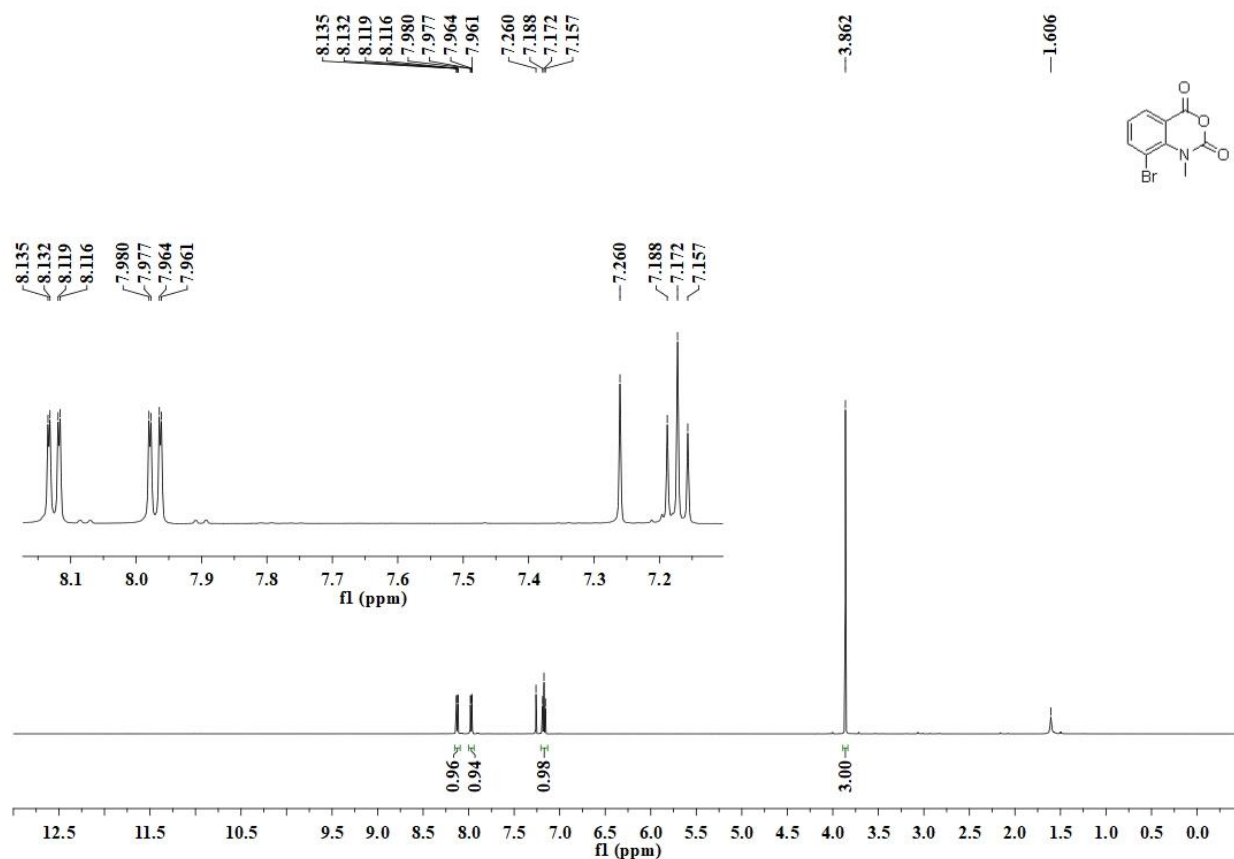

### $^{13}\text{C}$ NMR (125 MHz, $\text{CDCl}_3$ ) of **1b**

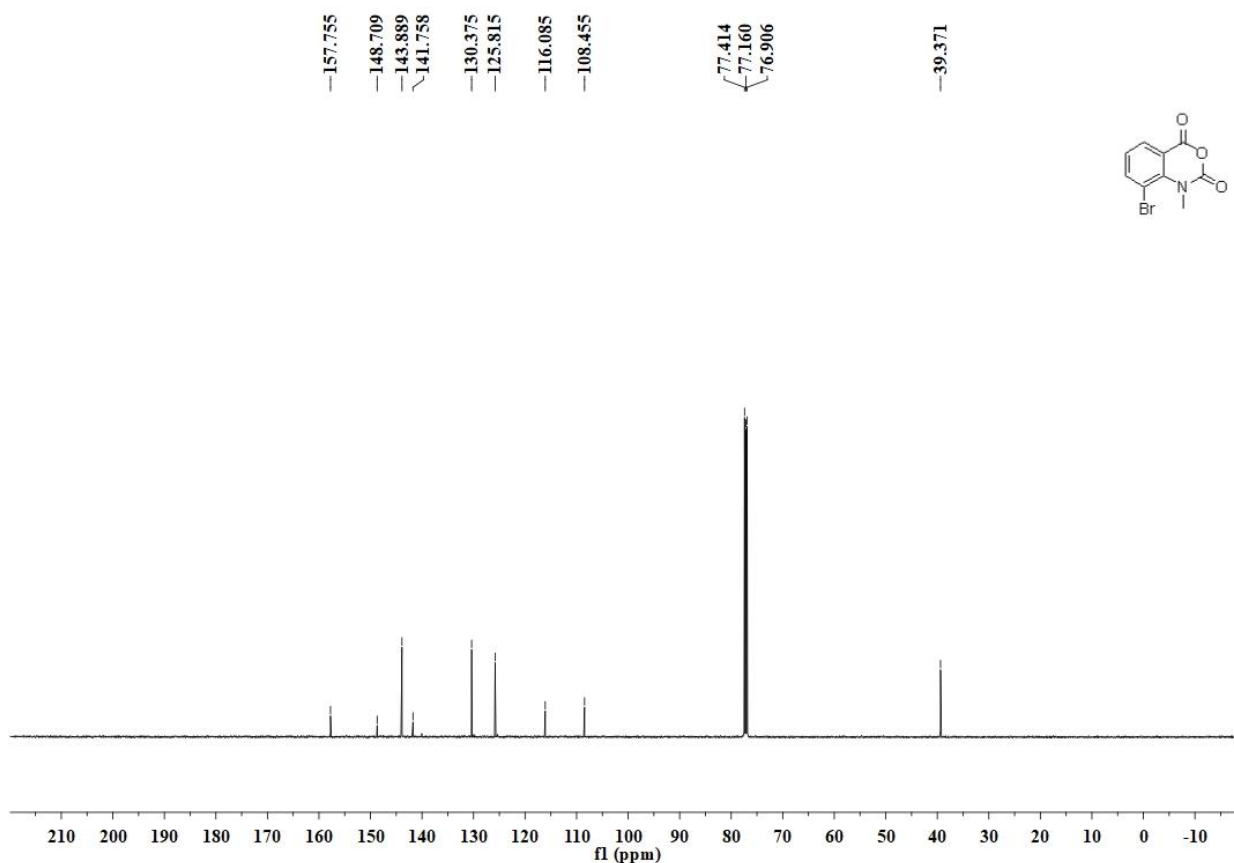

$^1\text{H}$  NMR (500 MHz, DMSO-*d*<sub>6</sub>) of **2f**

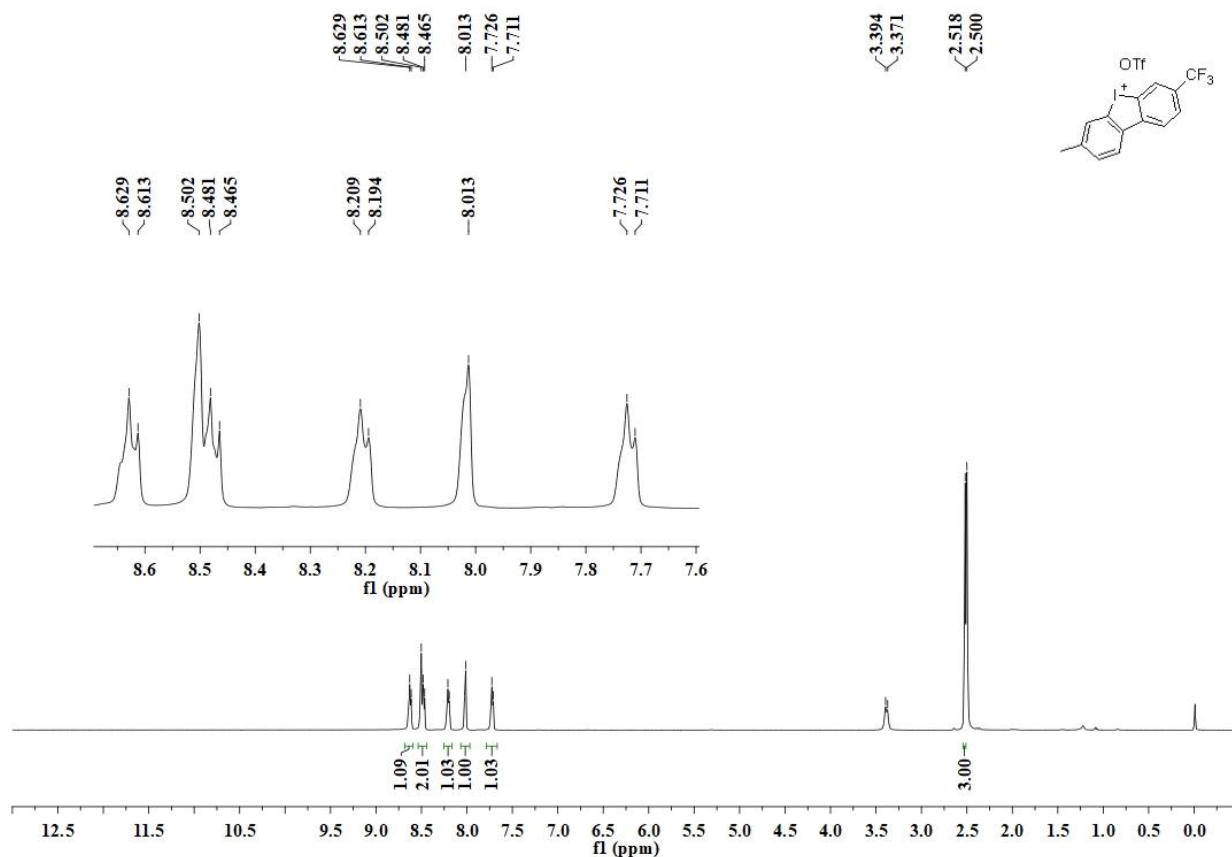

$^{13}\text{C}$  NMR (125 MHz, DMSO-*d*<sub>6</sub>) of **2f**

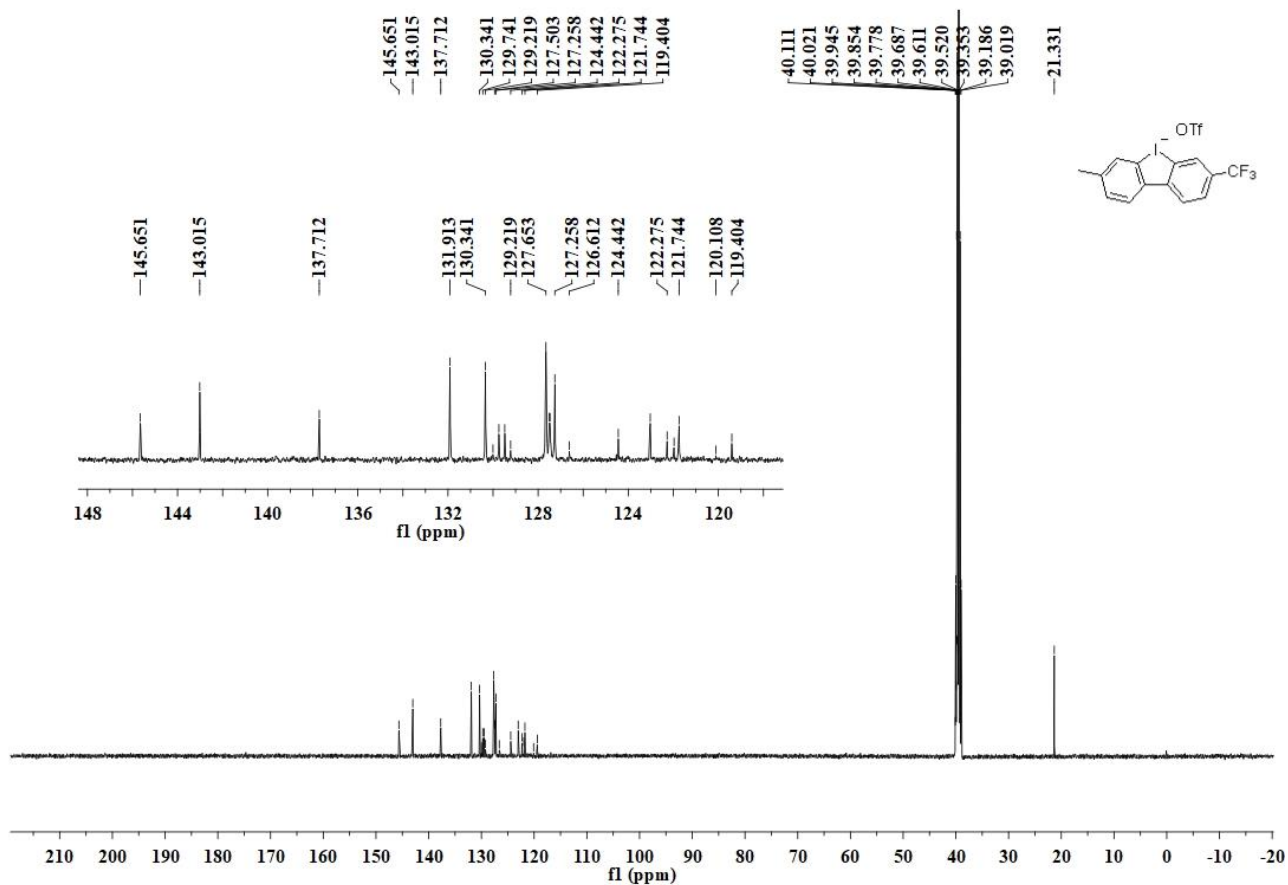

<sup>1</sup>H NMR (500 MHz, DMSO-*d*<sub>6</sub>) of **2i**

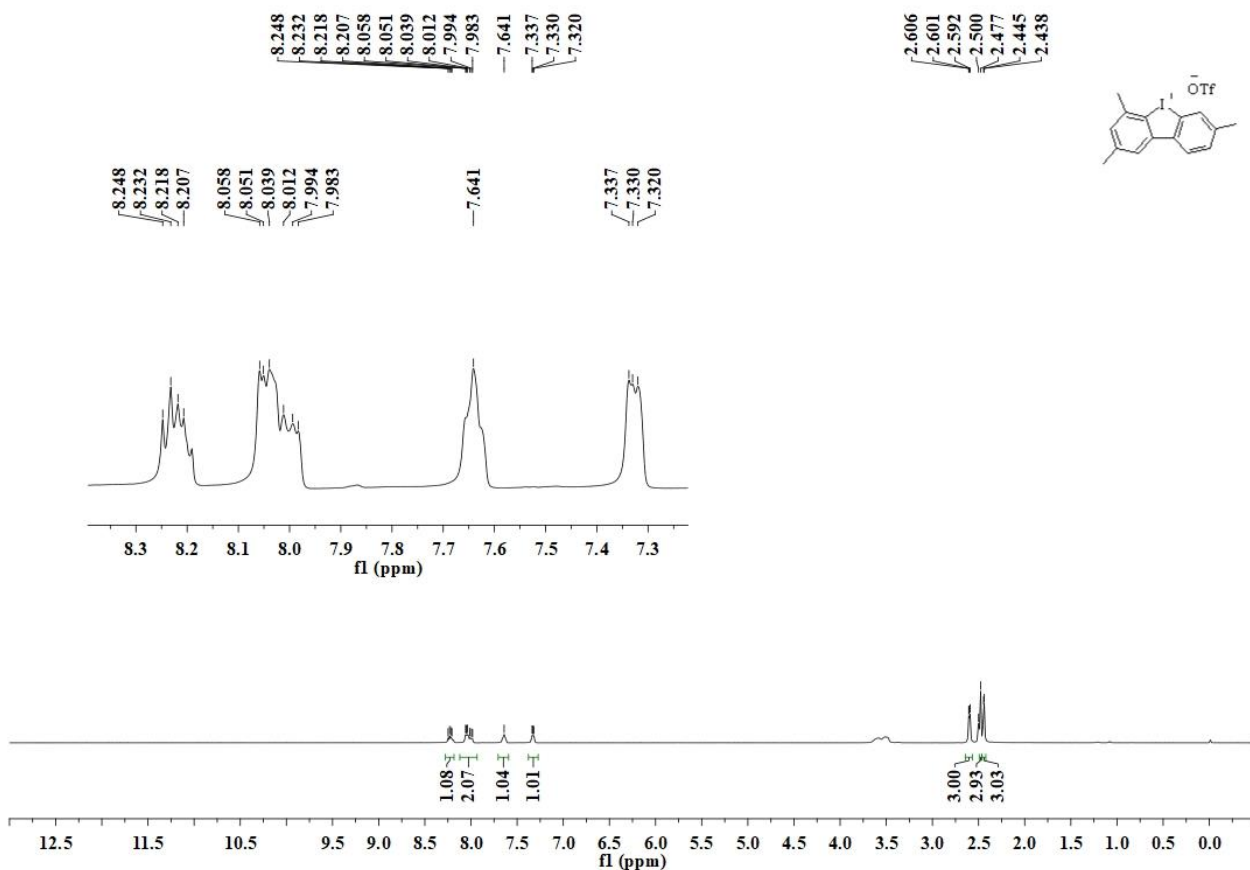

<sup>13</sup>C NMR (125 MHz, DMSO-*d*<sub>6</sub>) of **2i**

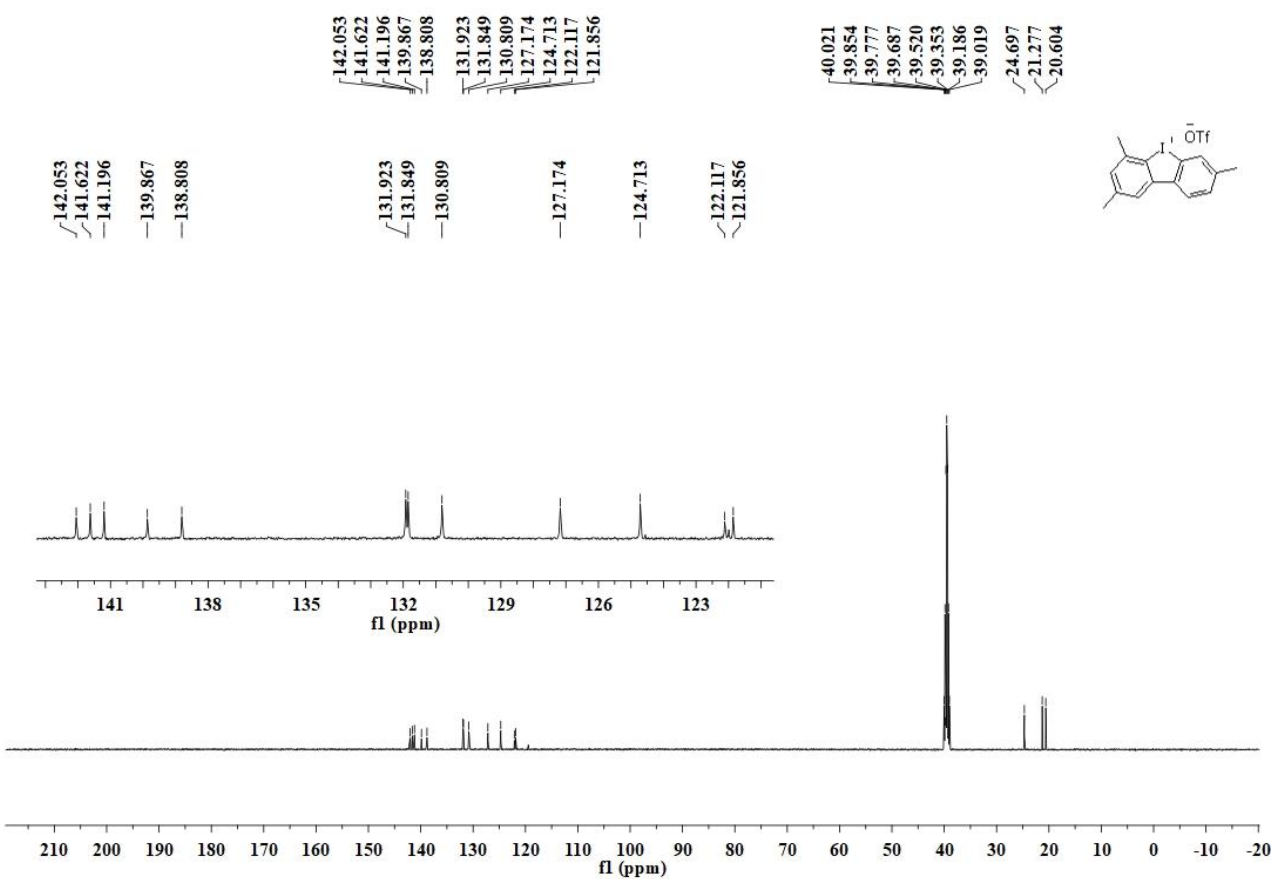

$^1\text{H}$  NMR (500 MHz,  $\text{CDCl}_3$ ) of **3a**

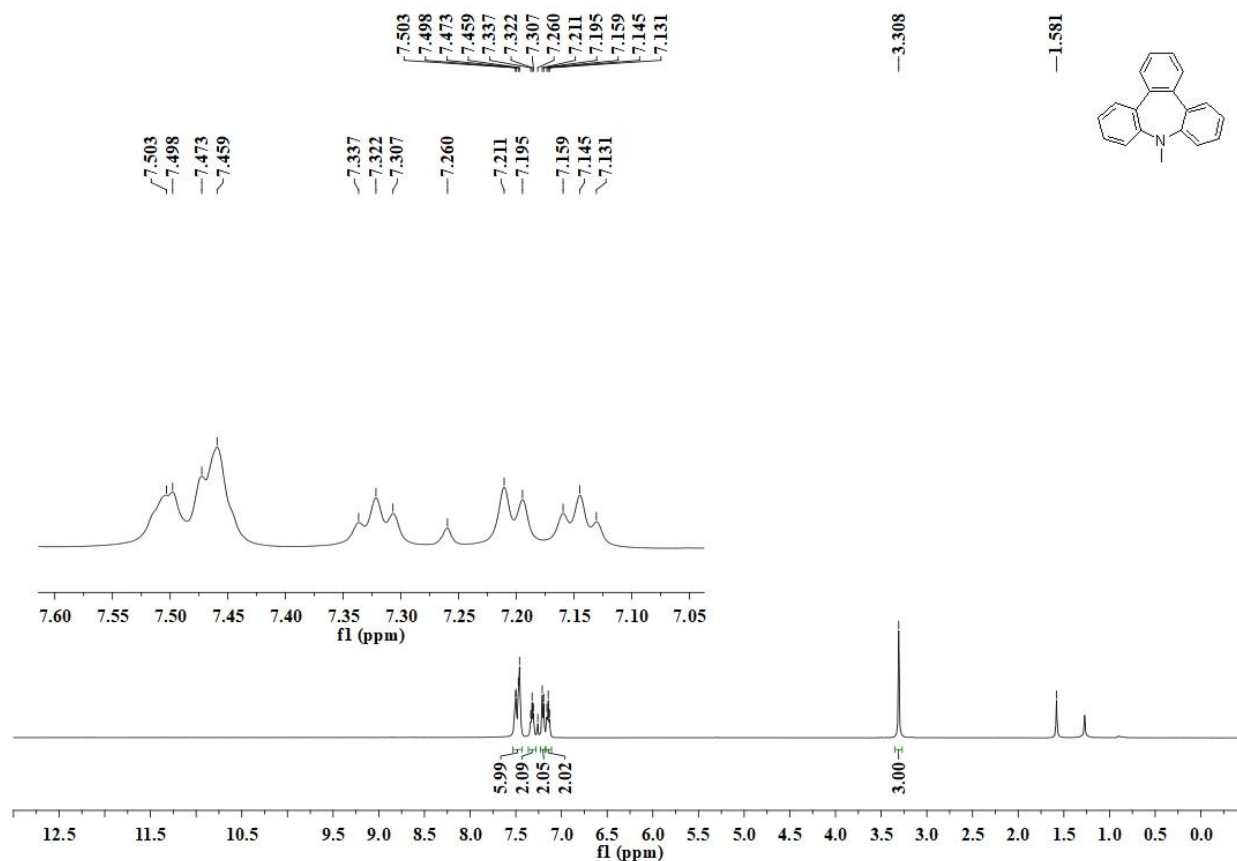

$^{13}\text{C}$  NMR (125 MHz,  $\text{CDCl}_3$ ) of **3a**

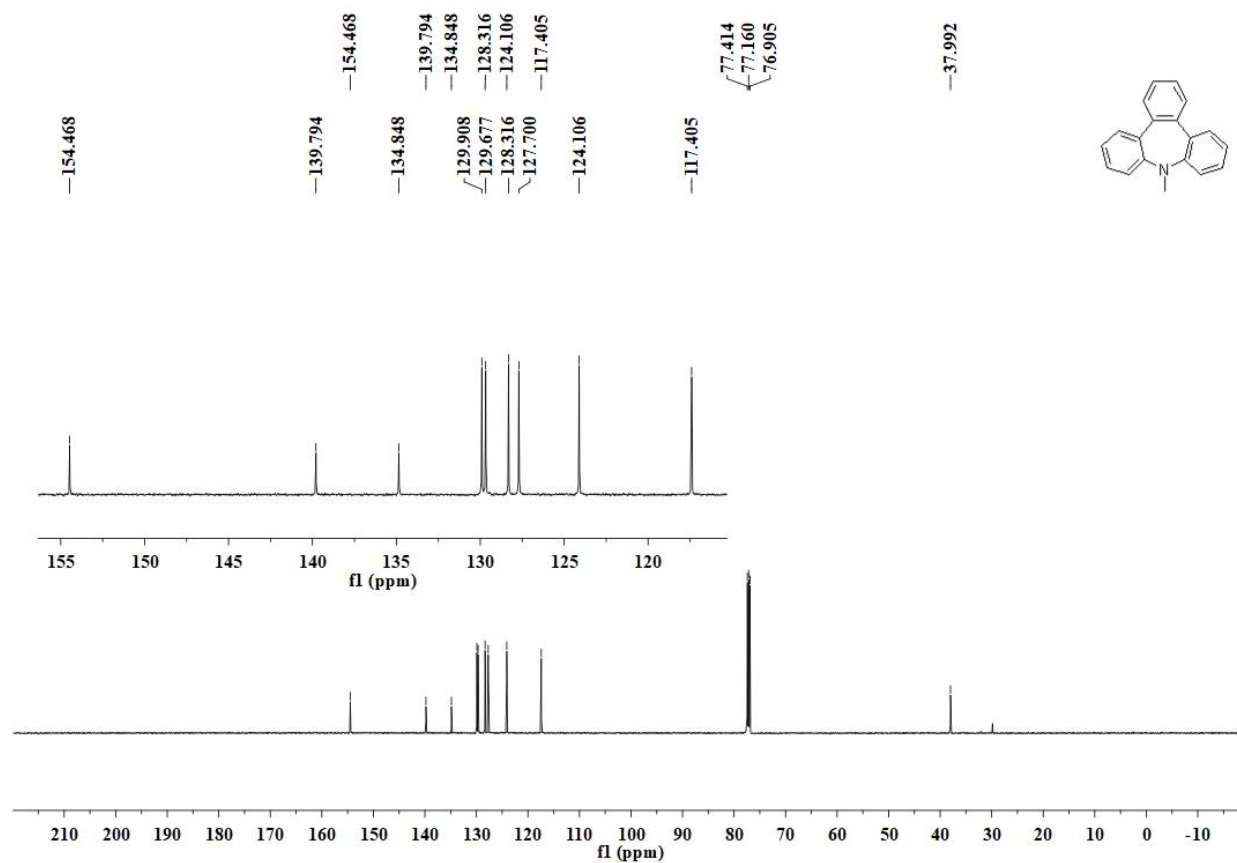

$^1\text{H}$  NMR (500 MHz,  $\text{CDCl}_3$ ) of **3b**

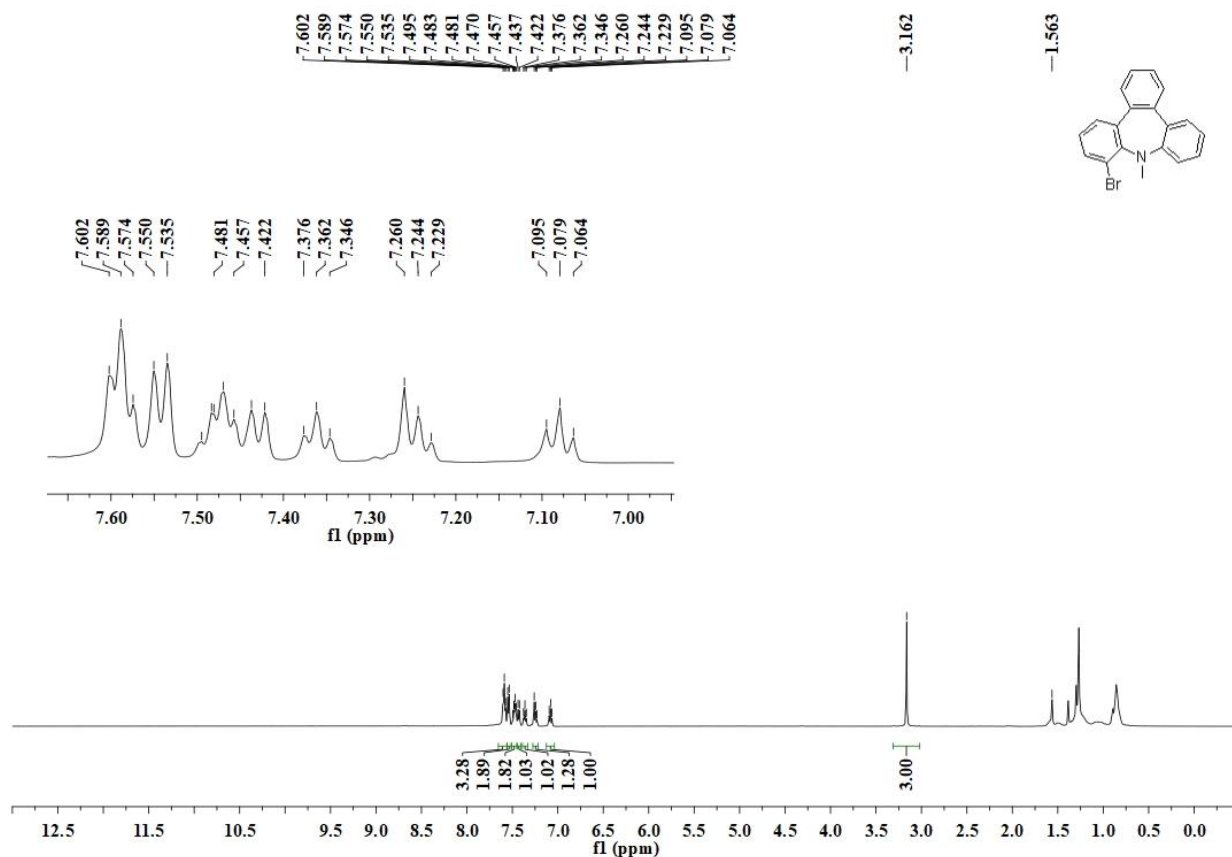

$^{13}\text{C}$  NMR (125 MHz,  $\text{CDCl}_3$ ) of **3b**

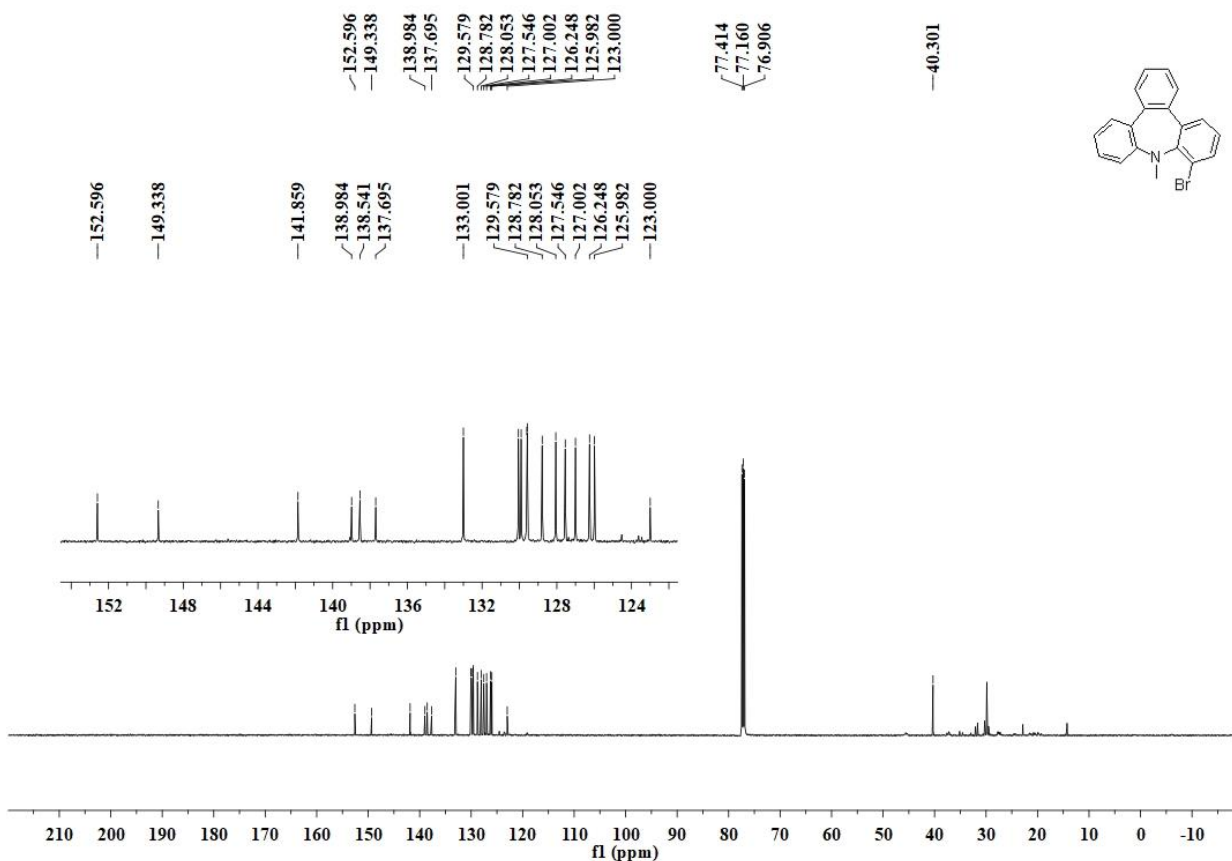

$^1\text{H}$  NMR (500 MHz,  $\text{CDCl}_3$ ) of **3c**

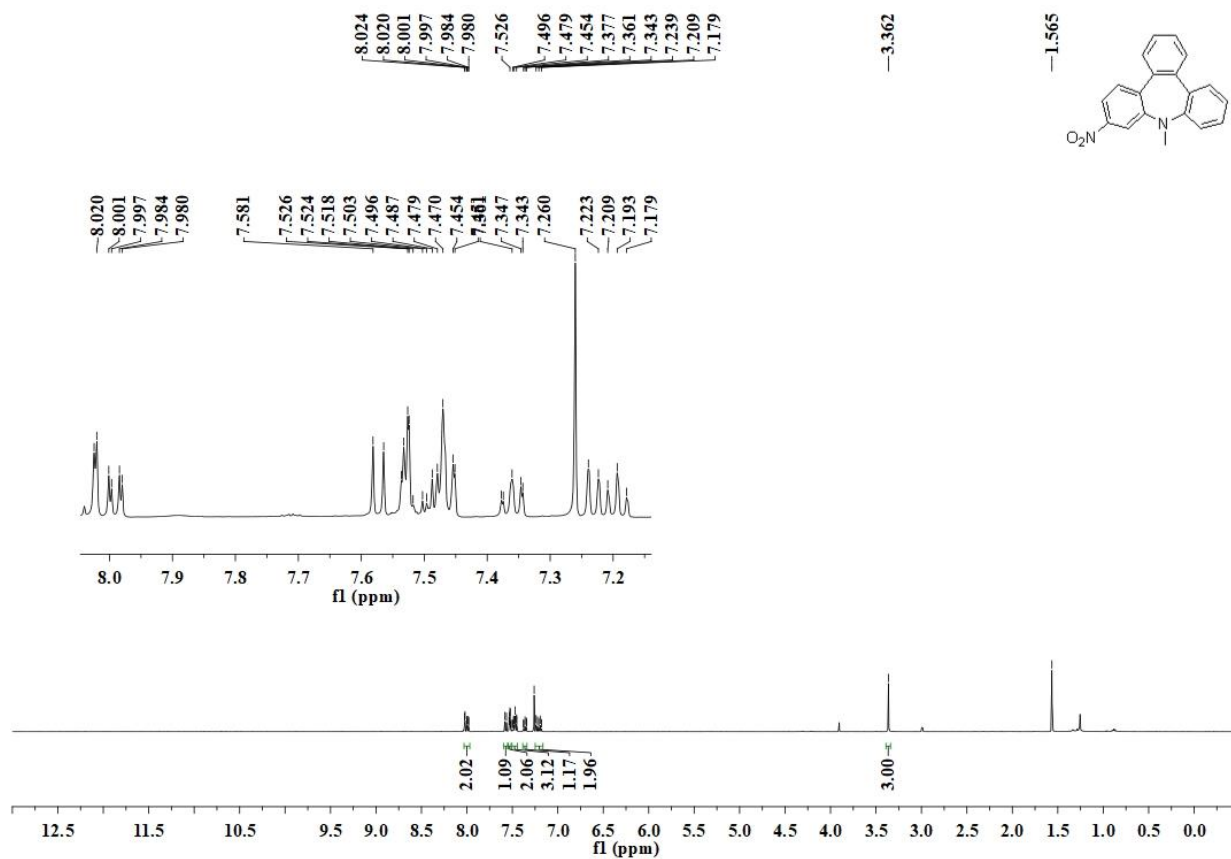

$^{13}\text{C}$  NMR (125 MHz,  $\text{CDCl}_3$ ) of **3c**

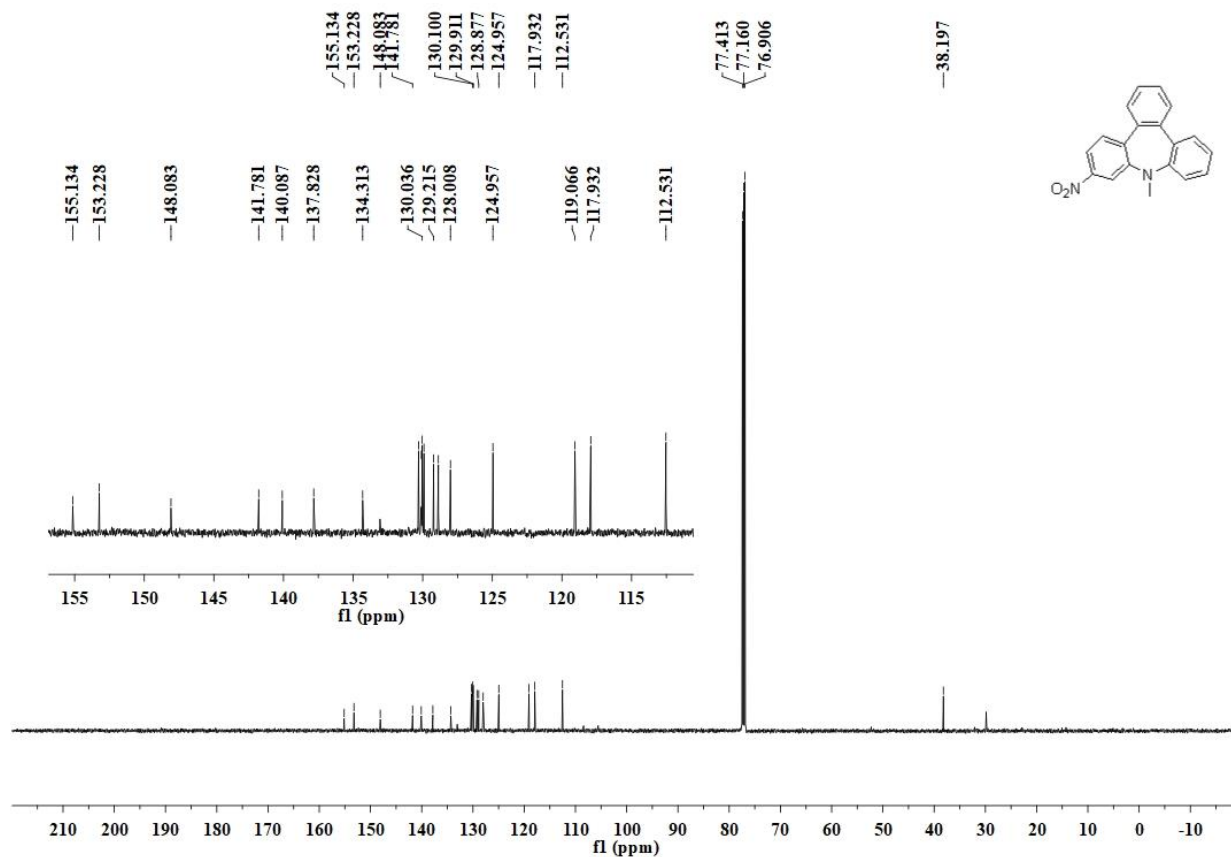



$^1\text{H}$  NMR (500 MHz,  $\text{CDCl}_3$ ) of **3d**

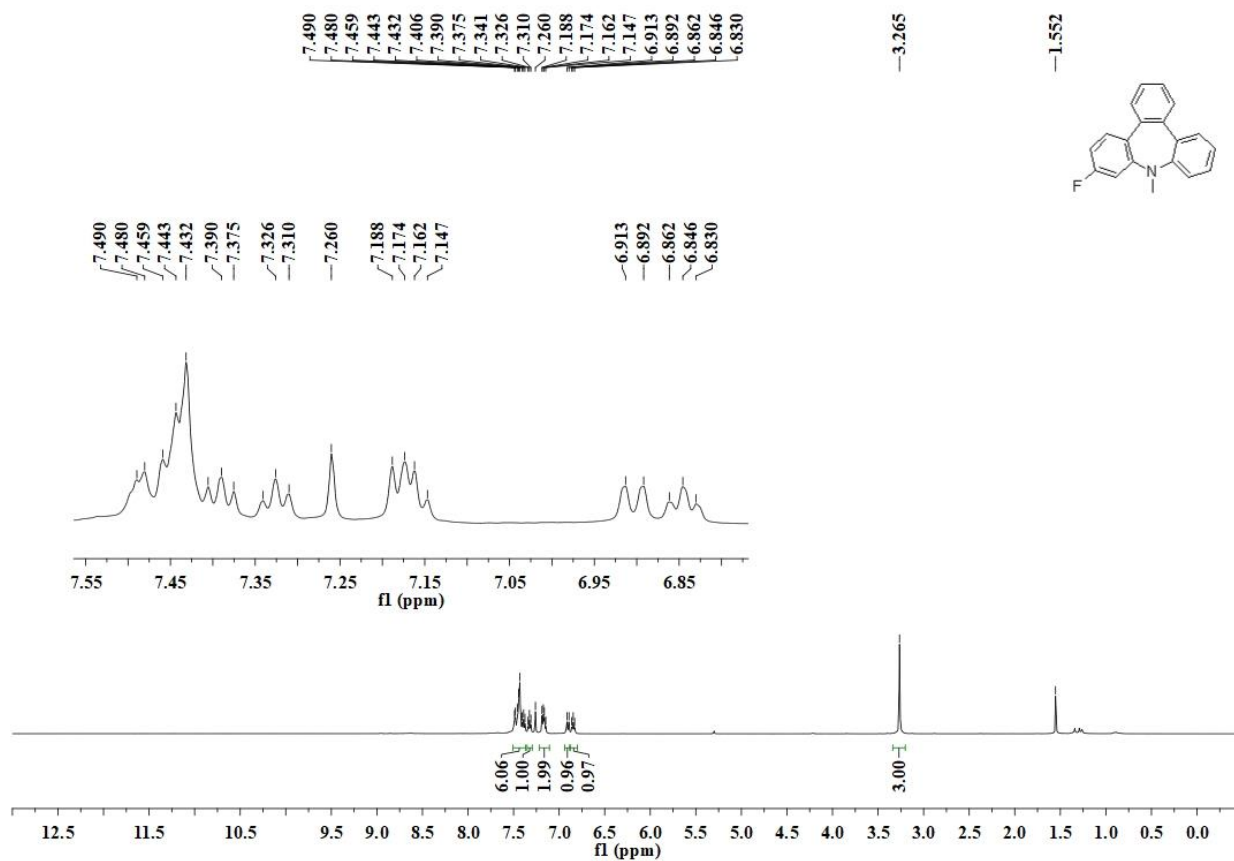

$^{13}\text{C}$  NMR (125 MHz,  $\text{CDCl}_3$ ) of **3d**

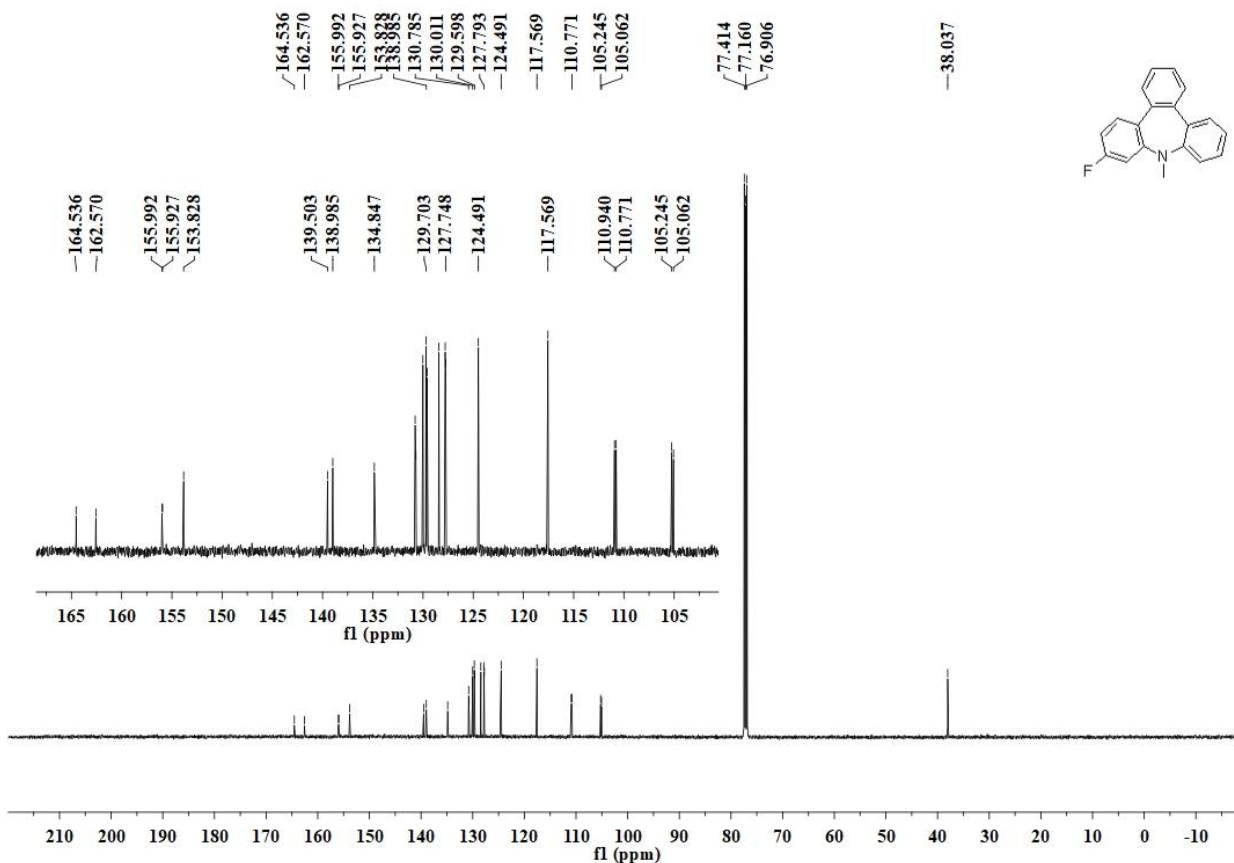

$^1\text{H}$  NMR (500 MHz,  $\text{CDCl}_3$ ) of **3e**

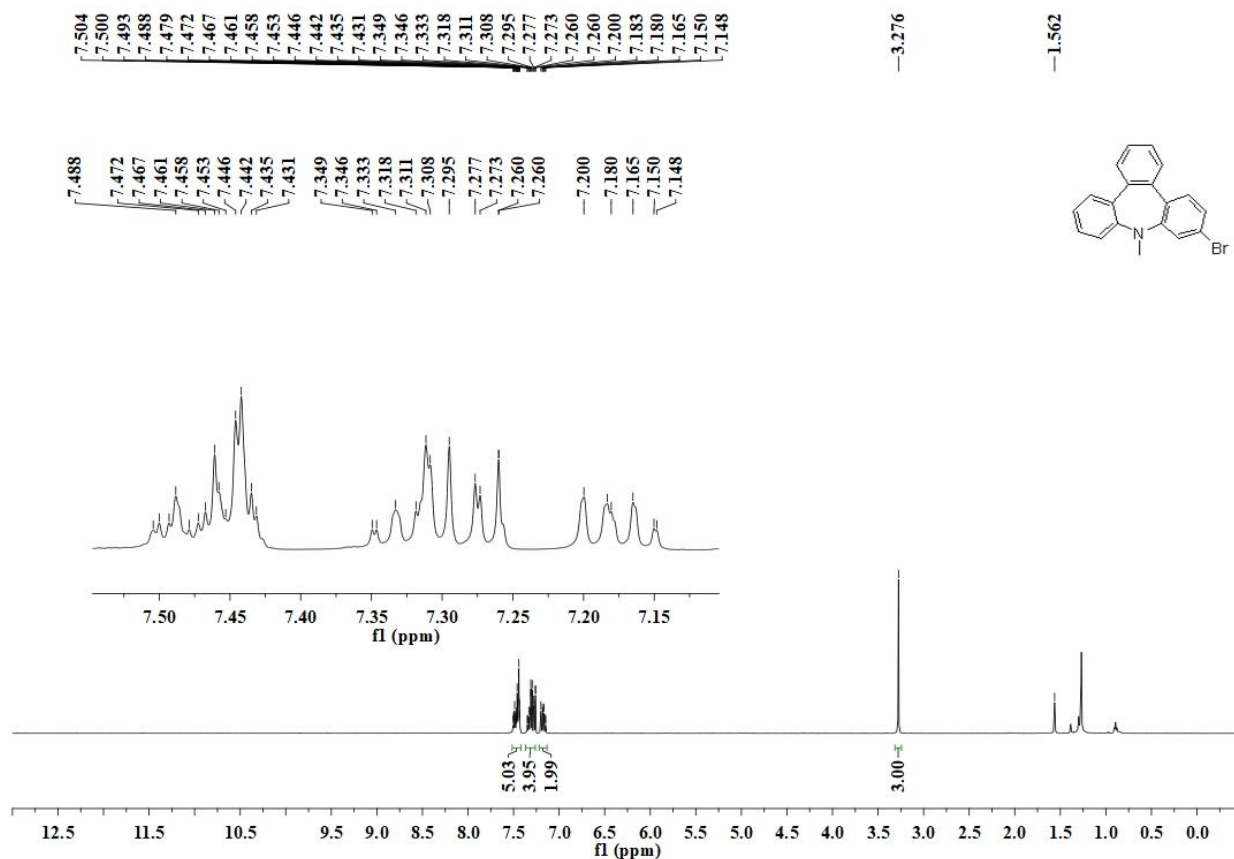

$^{13}\text{C}$  NMR (125 MHz,  $\text{CDCl}_3$ ) of **3e**

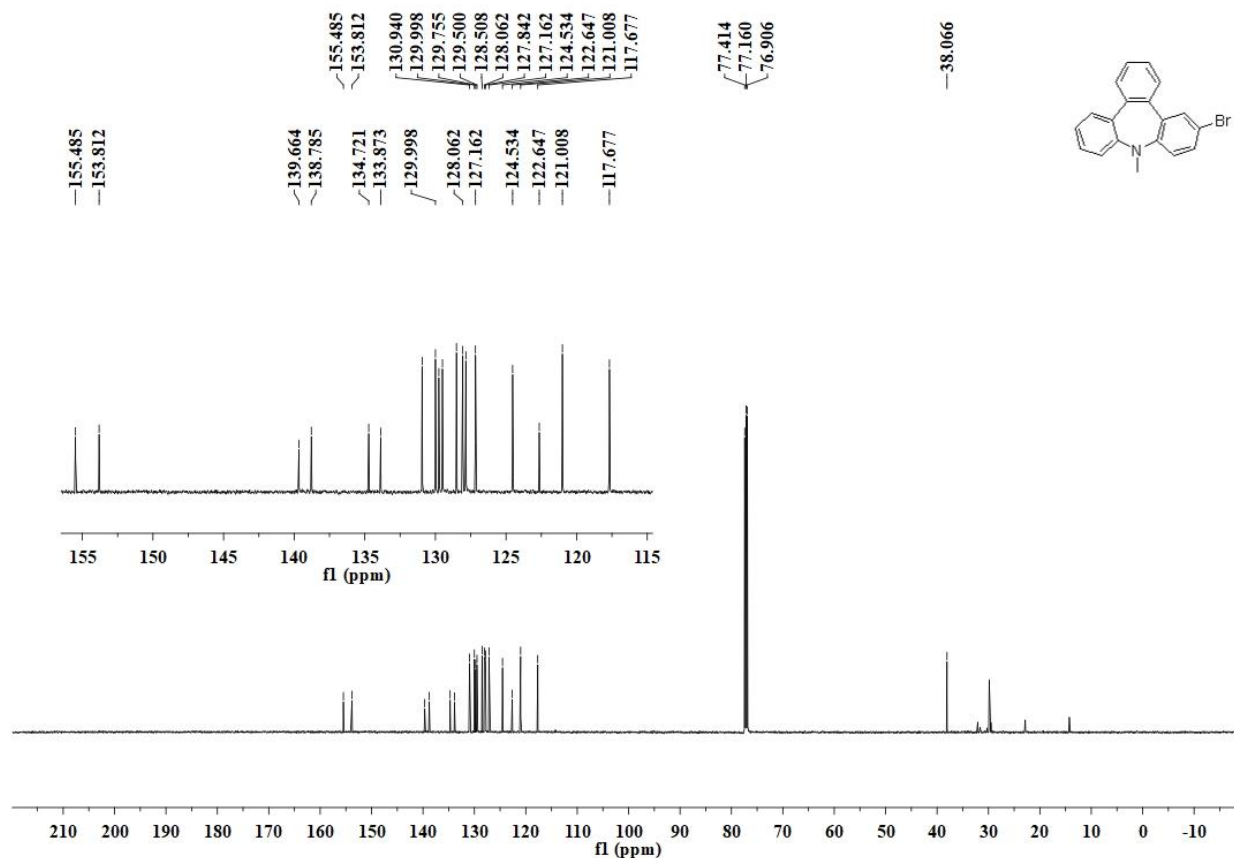

$^1\text{H}$  NMR (500 MHz,  $\text{CDCl}_3$ ) of **3f**

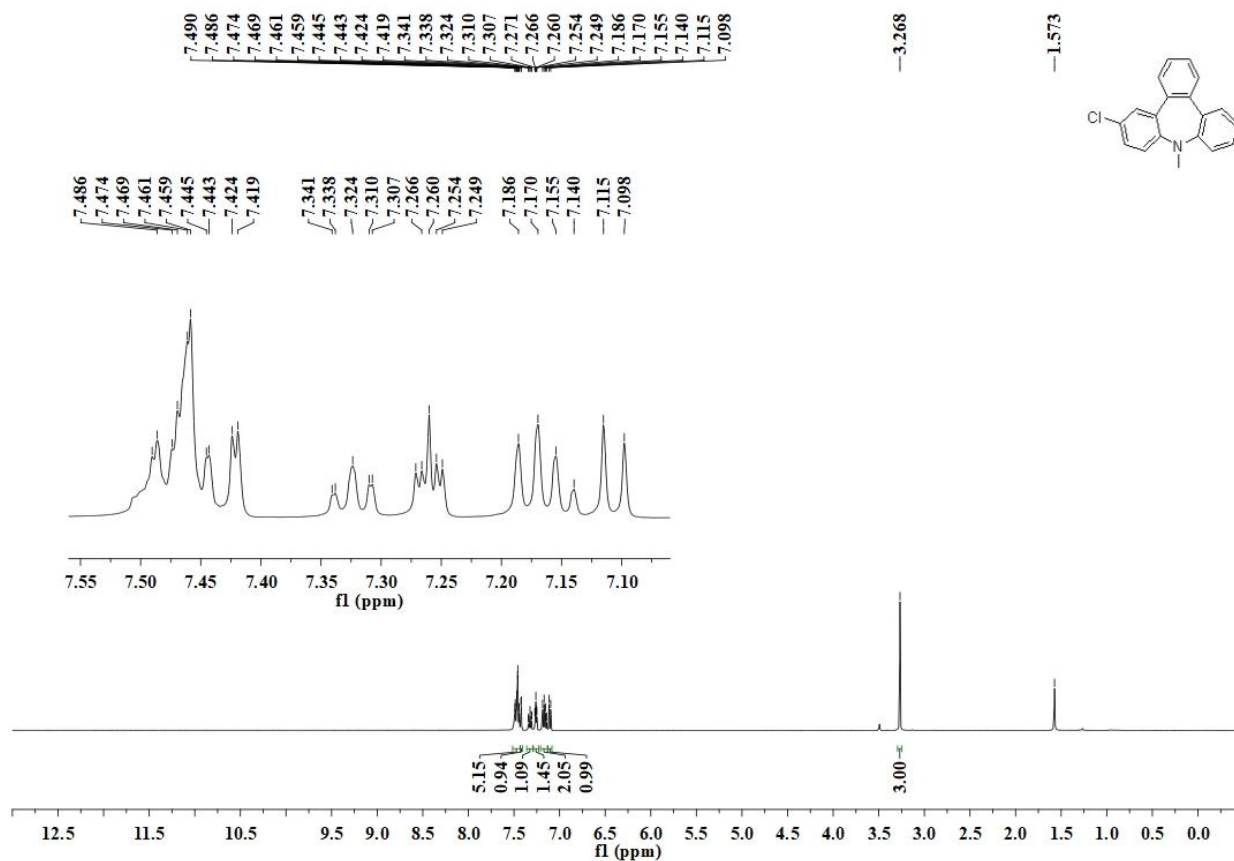

$^{13}\text{C}$  NMR (125 MHz,  $\text{CDCl}_3$ ) of **3f**

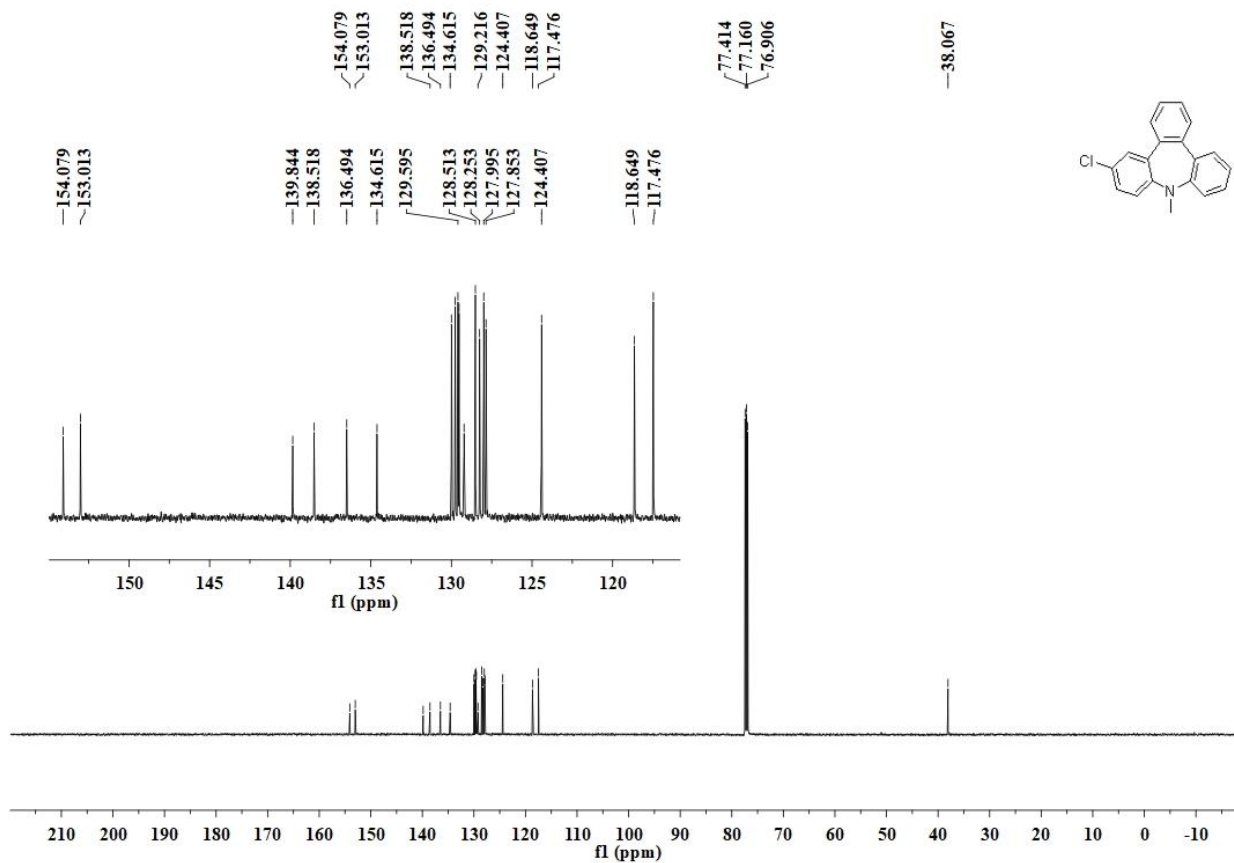

$^1\text{H}$  NMR (500 MHz,  $\text{CDCl}_3$ ) of **3g**

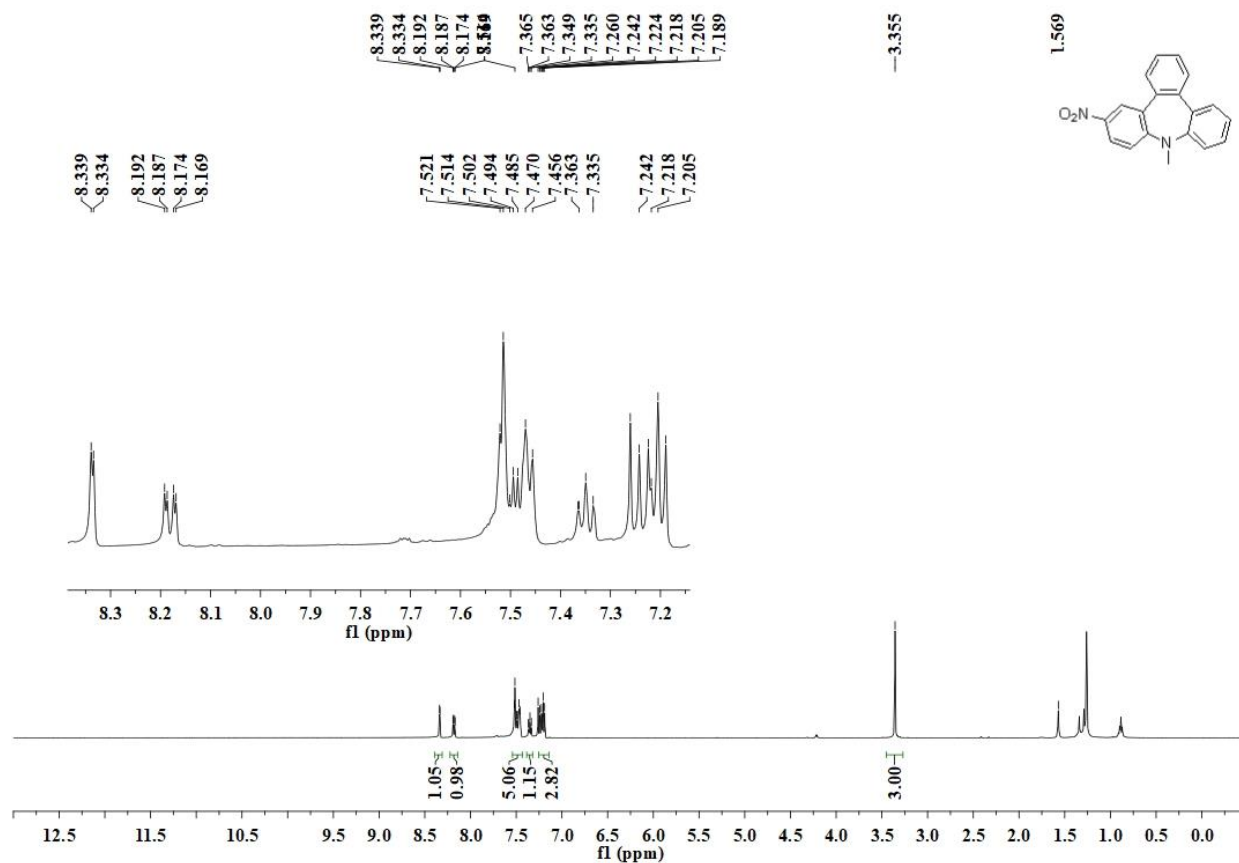

$^{13}\text{C}$  NMR (125 MHz,  $\text{CDCl}_3$ ) of **3g**

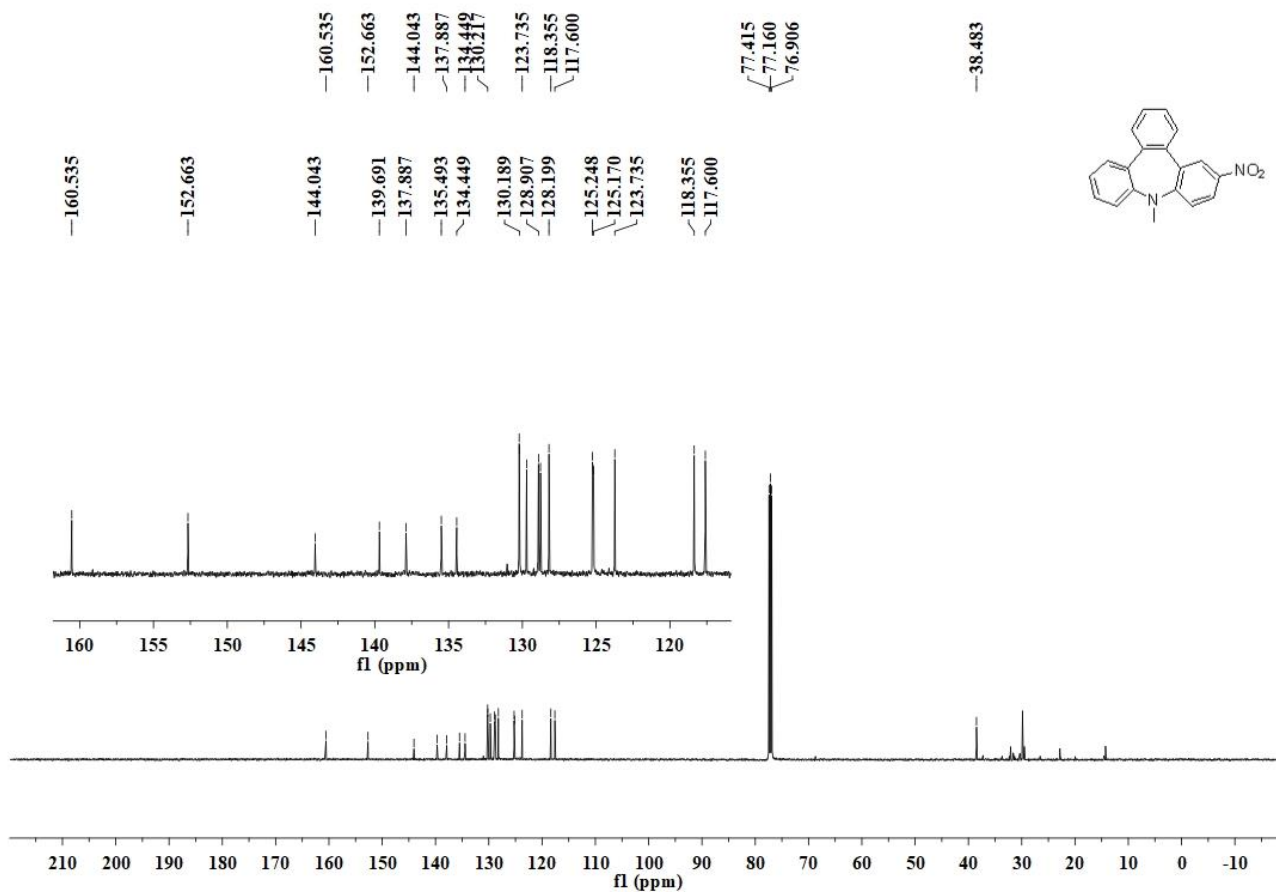

<sup>1</sup>H NMR (500 MHz, CDCl<sub>3</sub>) of **3h**

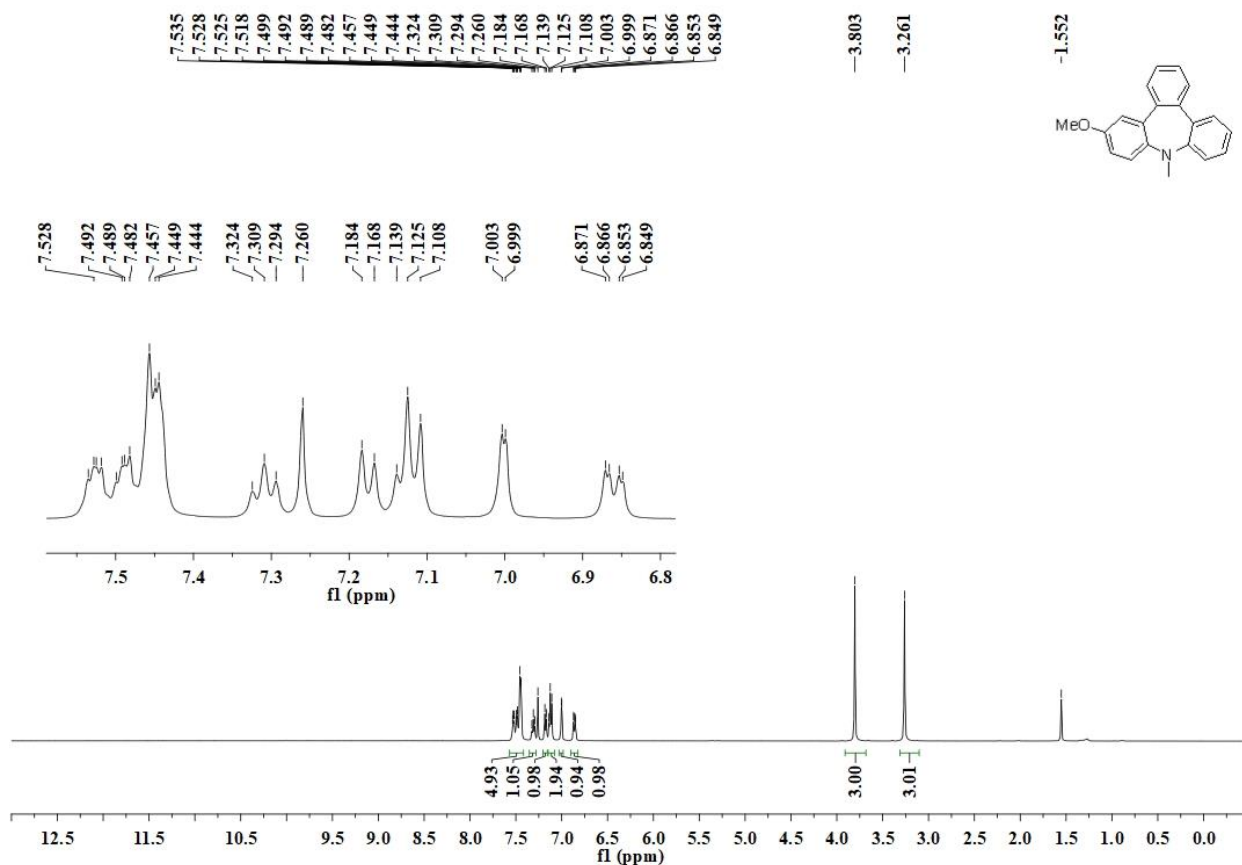

<sup>13</sup>C NMR (125 MHz, CDCl<sub>3</sub>) of **3h**

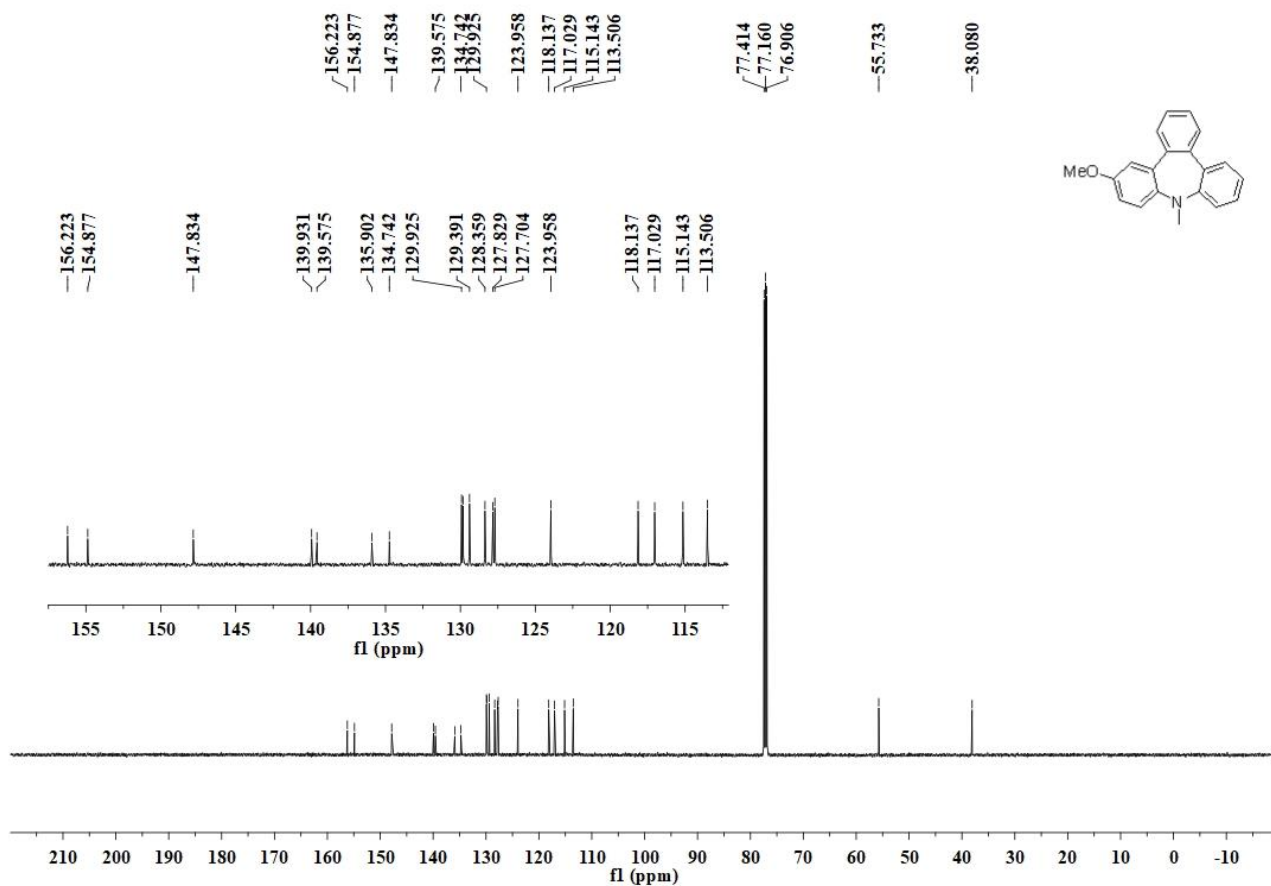

$^1\text{H}$  NMR (500 MHz,  $\text{CDCl}_3$ ) of **3i**

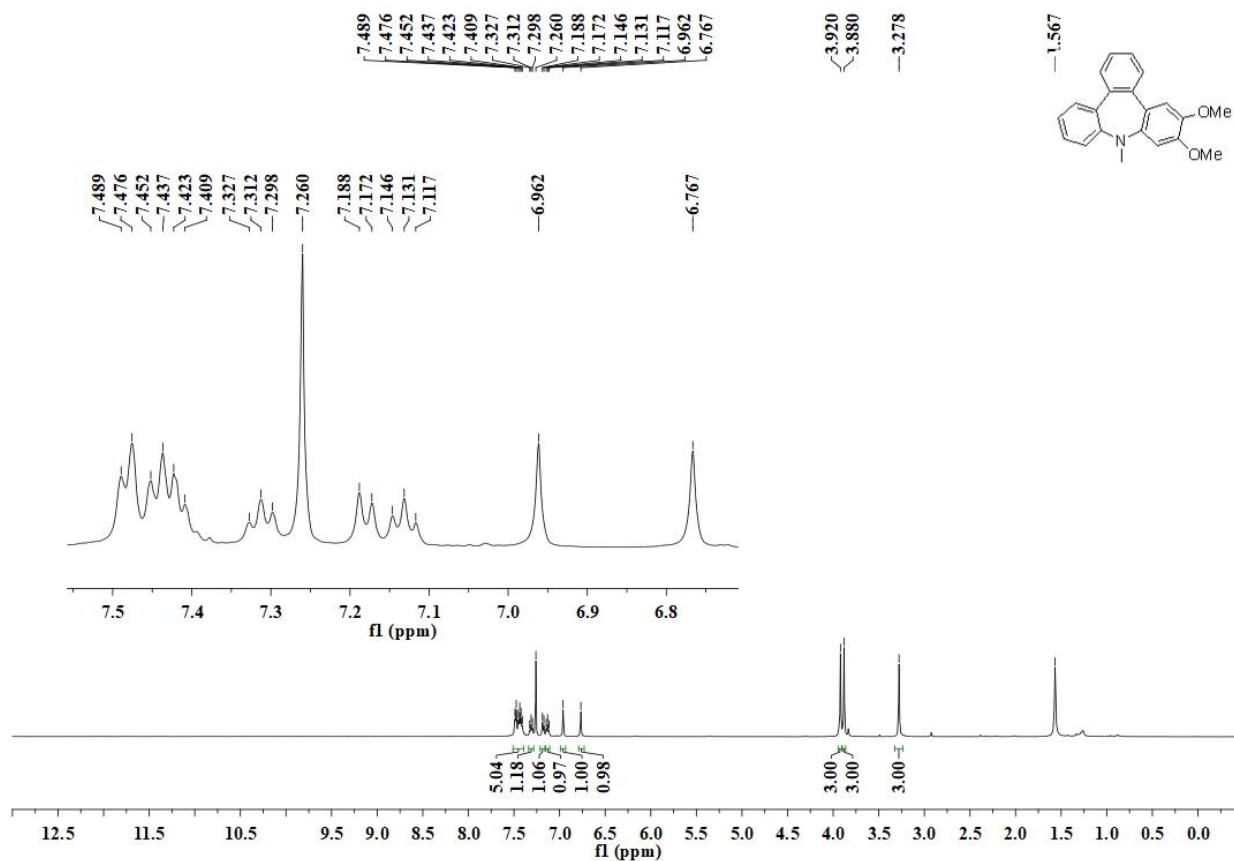

$^{13}\text{C}$  NMR (125 MHz,  $\text{CDCl}_3$ ) of **3i**

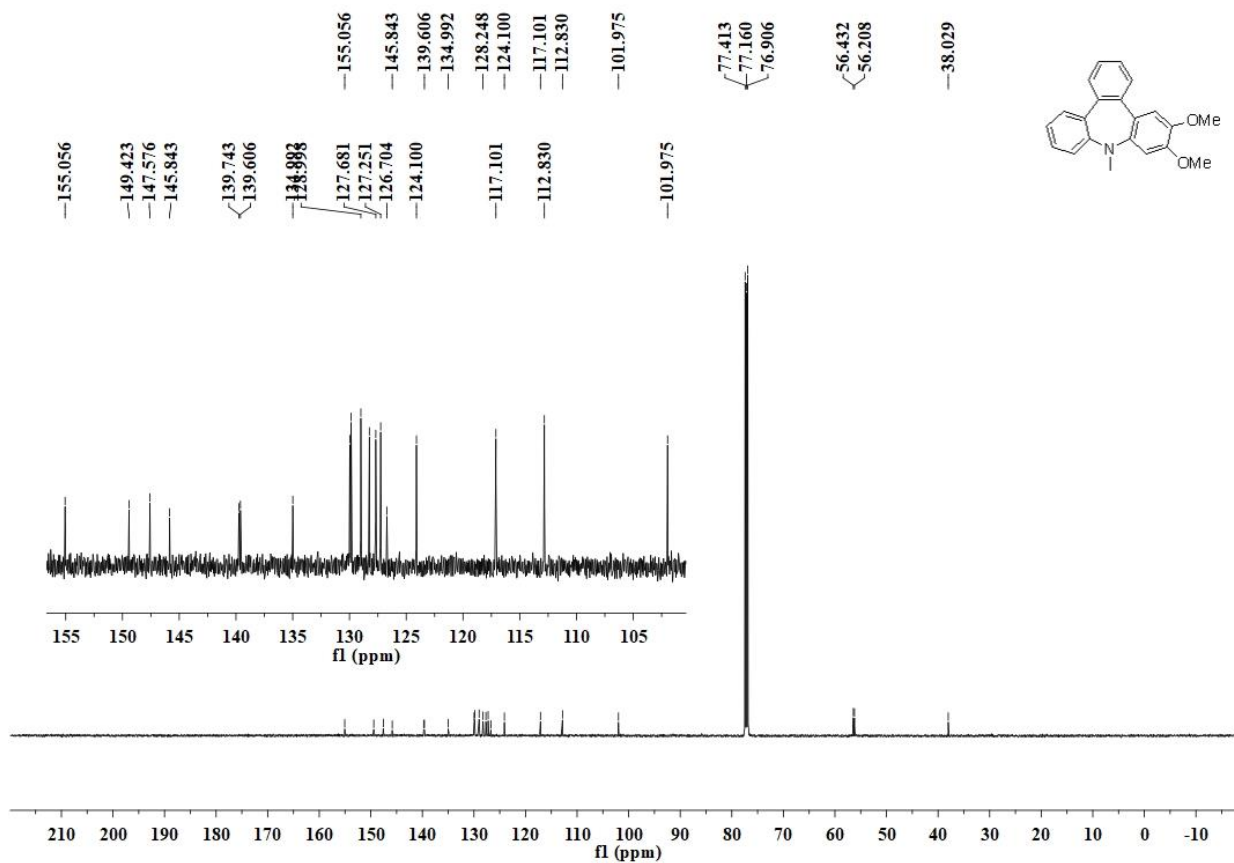

$^1\text{H}$  NMR (500 MHz,  $\text{CDCl}_3$ ) of **3j**

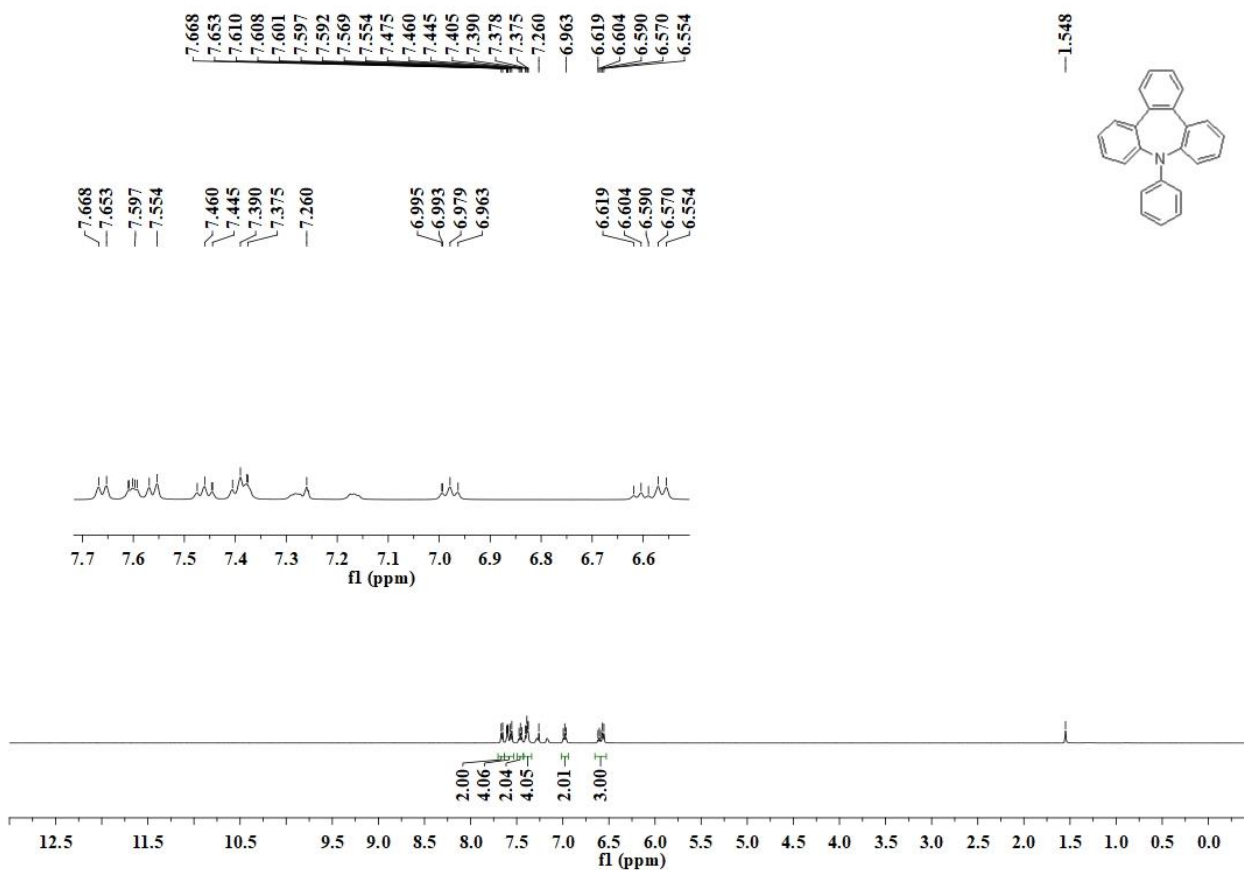

$^{13}\text{C}$  NMR (125 MHz,  $\text{CDCl}_3$ ) of **3j**

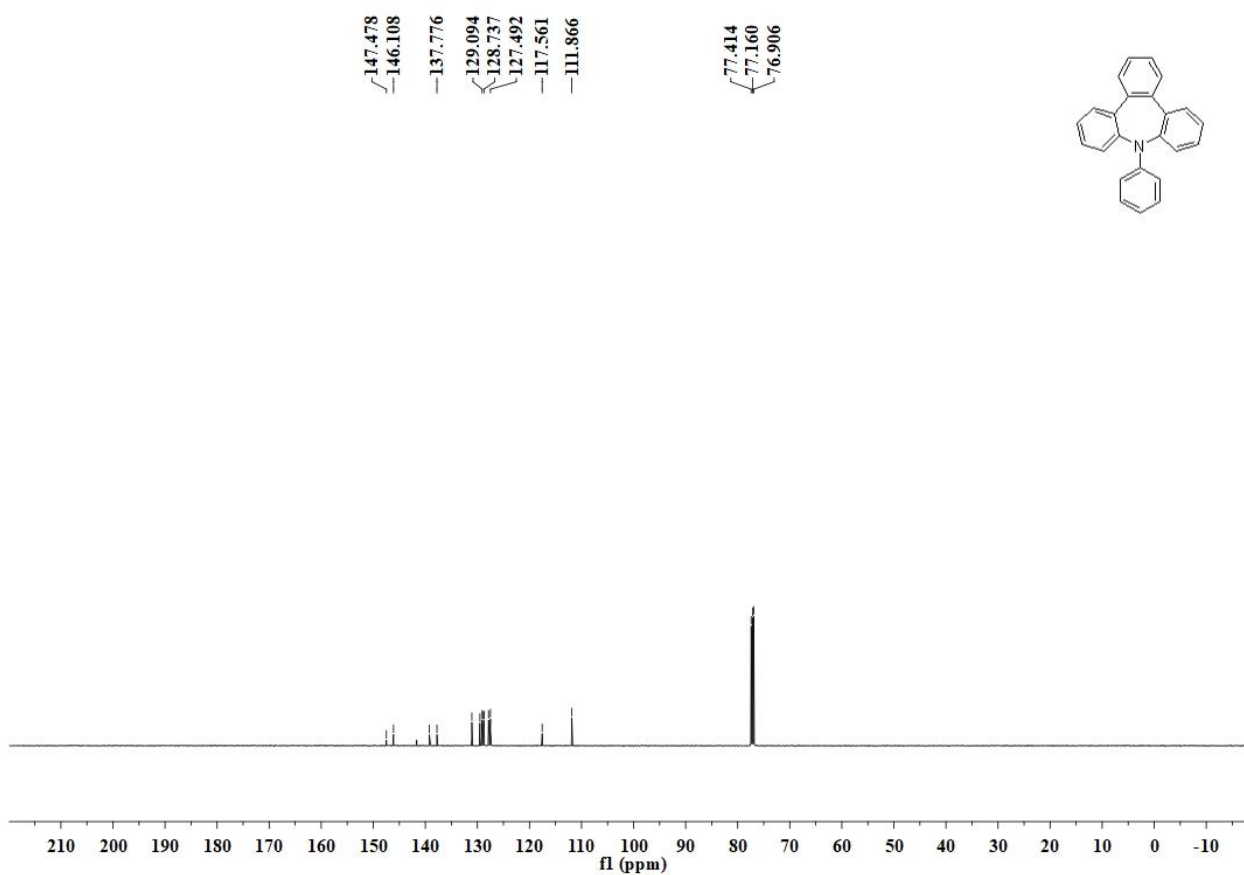

<sup>1</sup>H NMR (500 MHz, CDCl<sub>3</sub>) of **3k**

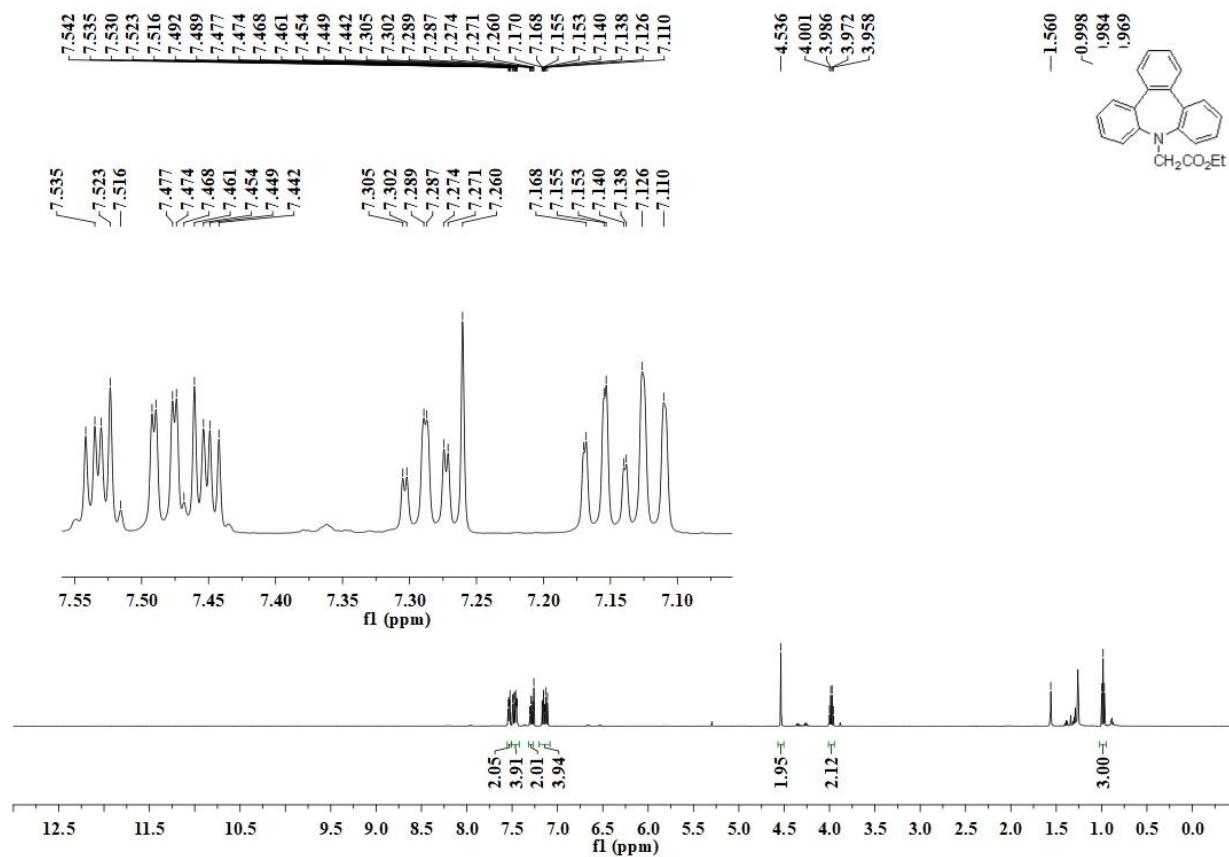

<sup>13</sup>C NMR (125 MHz, CDCl<sub>3</sub>) of **3k**

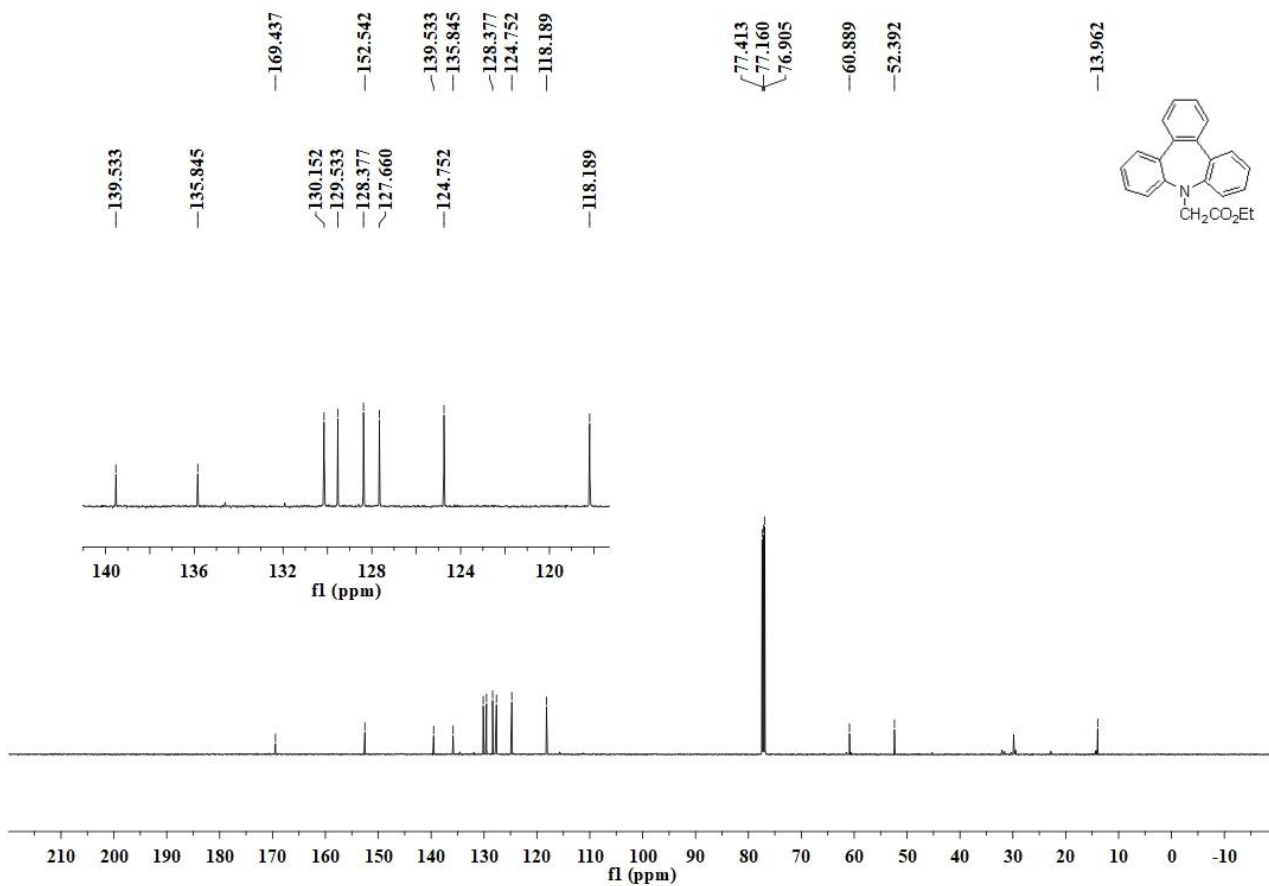



$^1\text{H}$  NMR (500 MHz,  $\text{CDCl}_3$ ) of **4a**

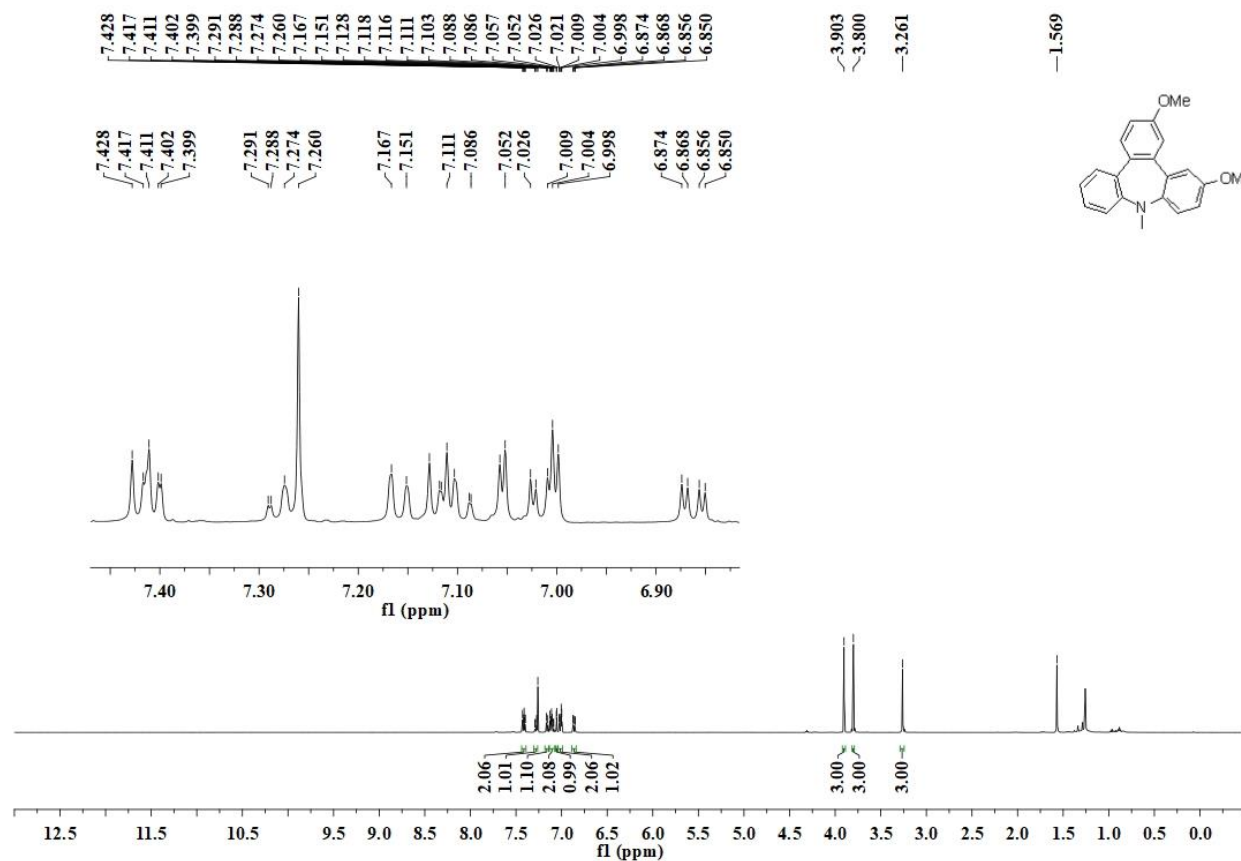

$^{13}\text{C}$  NMR (125 MHz,  $\text{CDCl}_3$ ) of **4a**

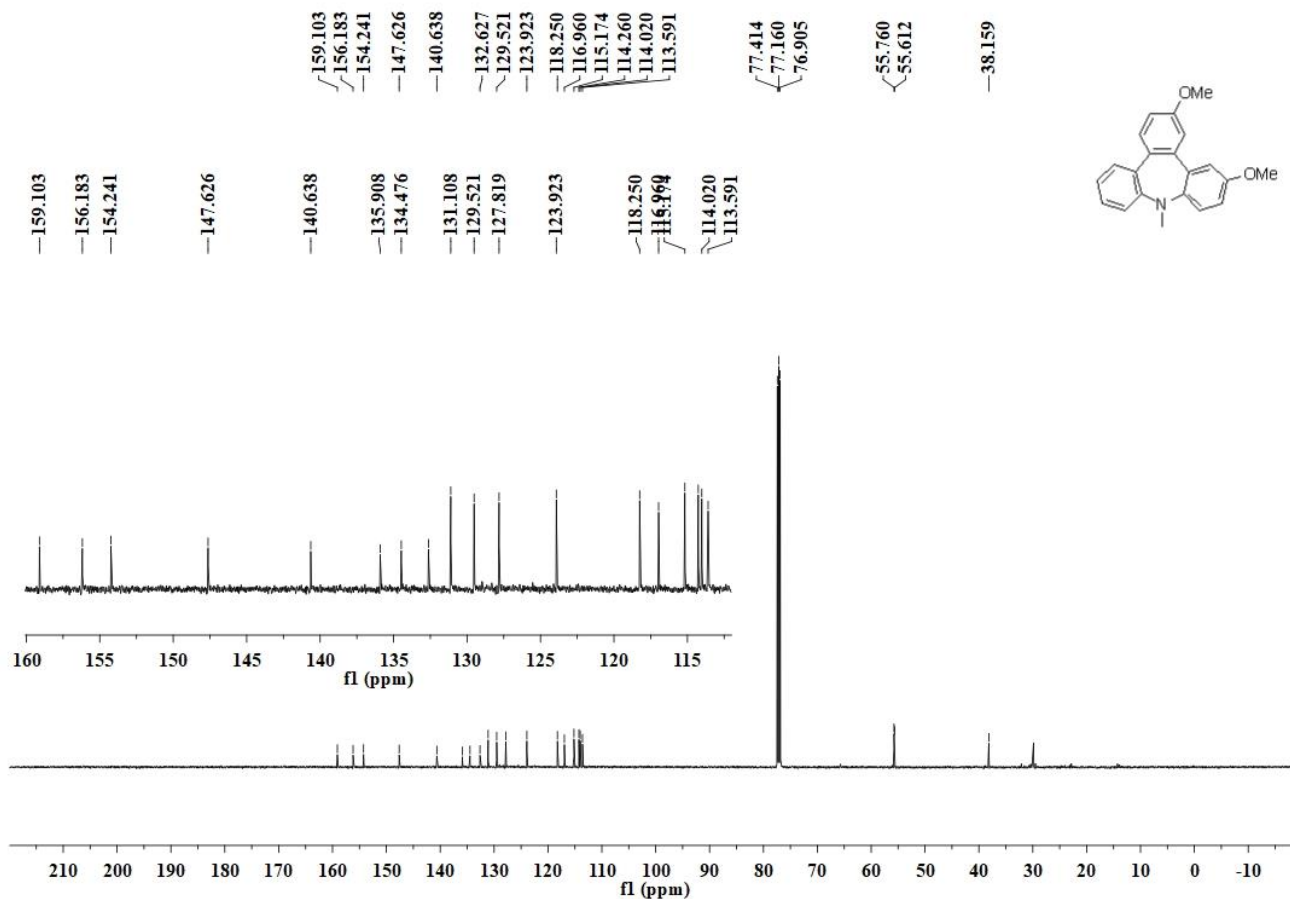

<sup>1</sup>H NMR (500 MHz, CDCl<sub>3</sub>) of **4b**

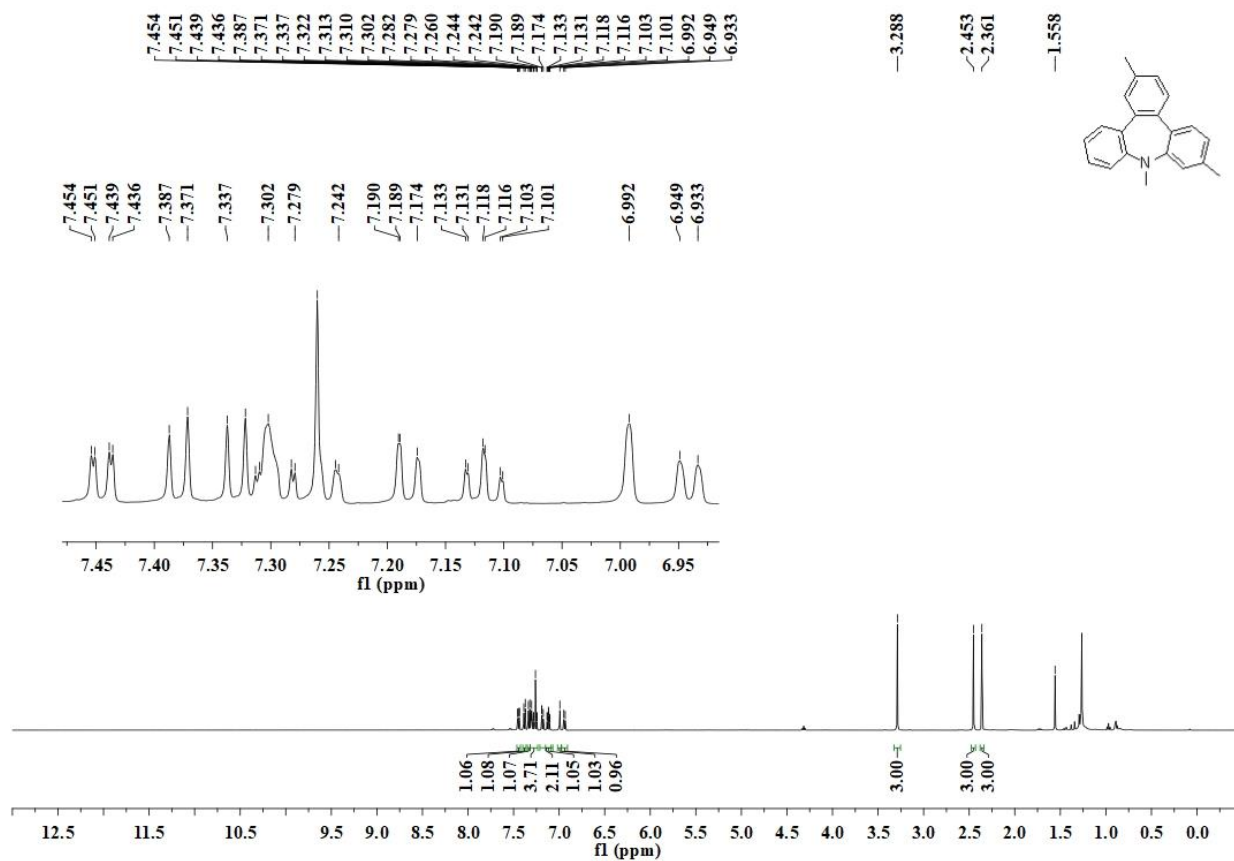

<sup>13</sup>C NMR (125 MHz, CDCl<sub>3</sub>) of **4b**

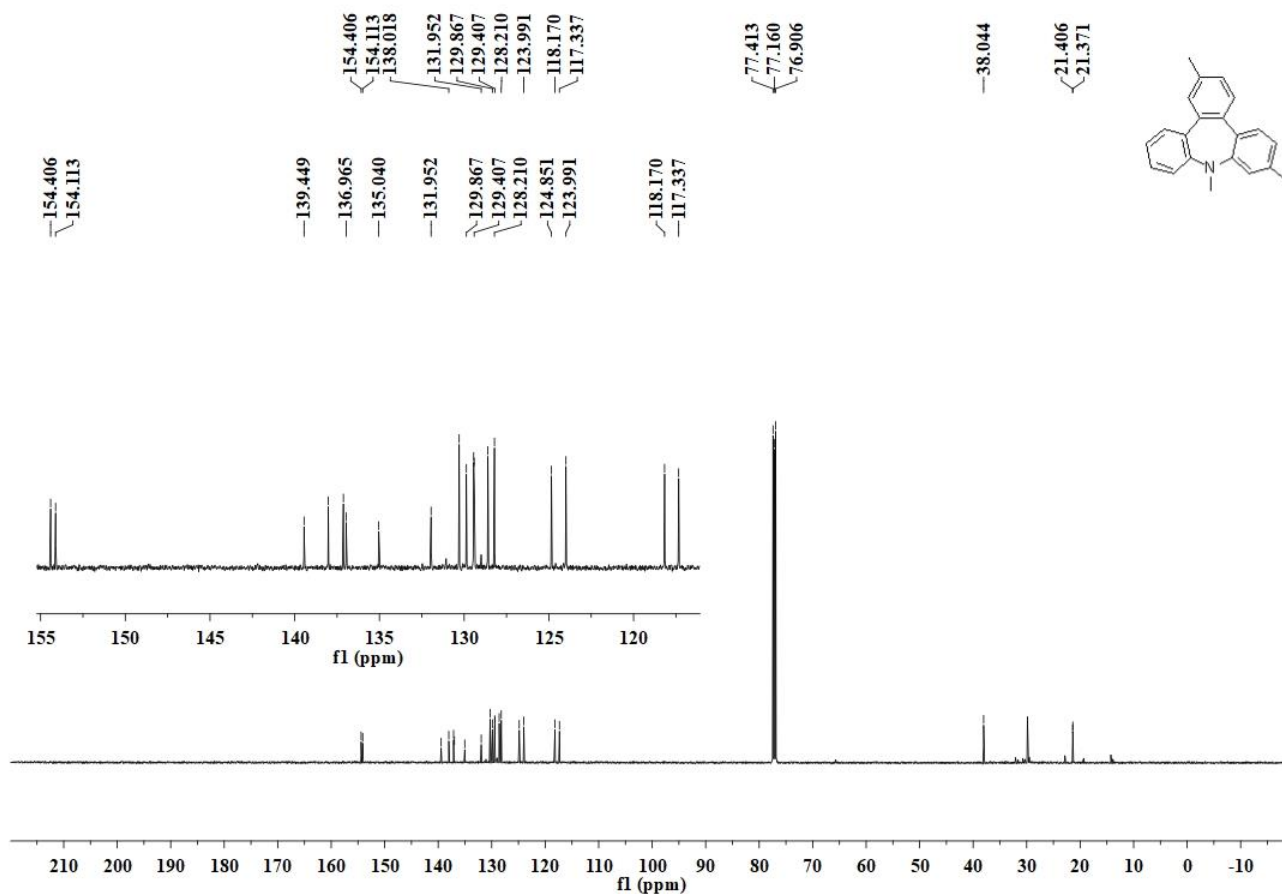

$^1\text{H}$  NMR (500 MHz,  $\text{CDCl}_3$ ) of **4c**

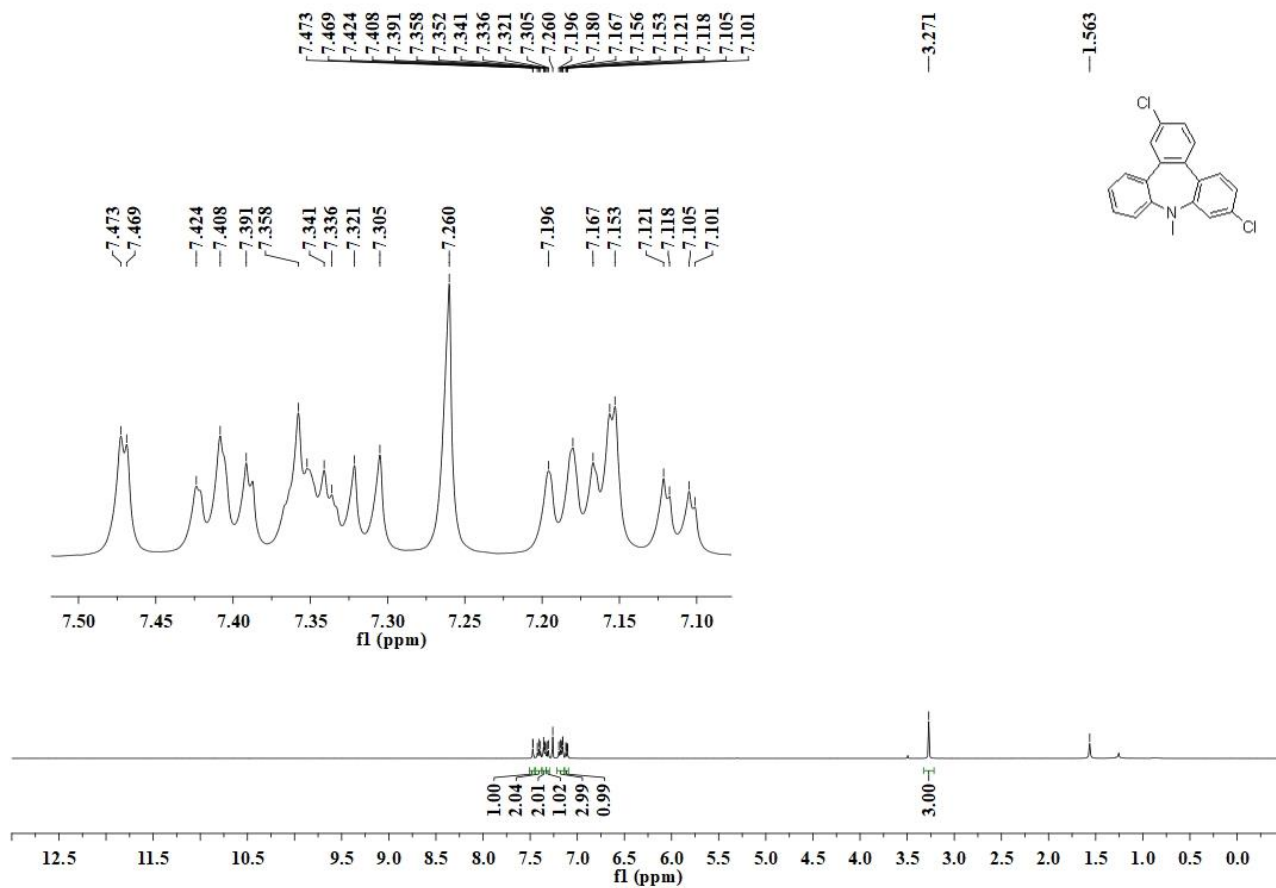

$^{13}\text{C}$  NMR (125 MHz,  $\text{CDCl}_3$ ) of **4c**

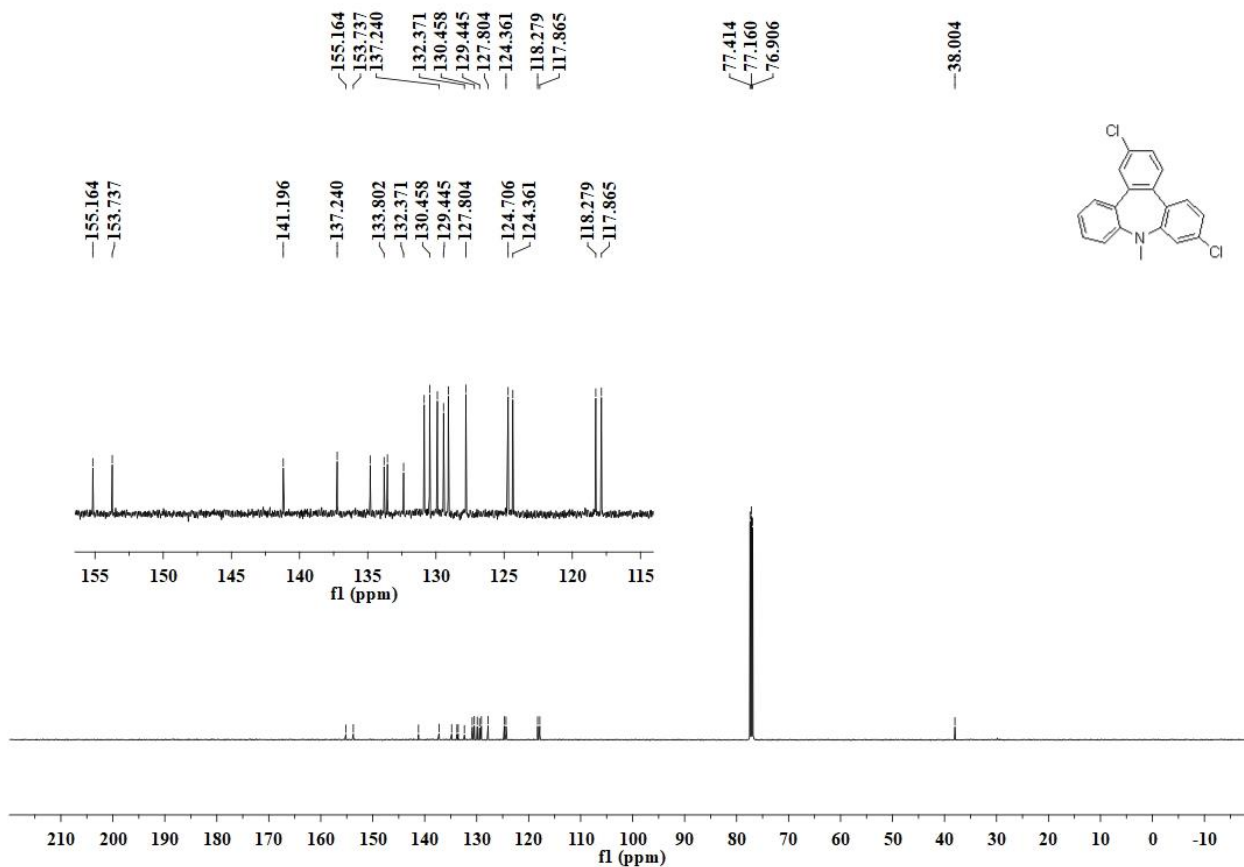

$^1\text{H}$  NMR (500 MHz,  $\text{CDCl}_3$ ) of **4d**

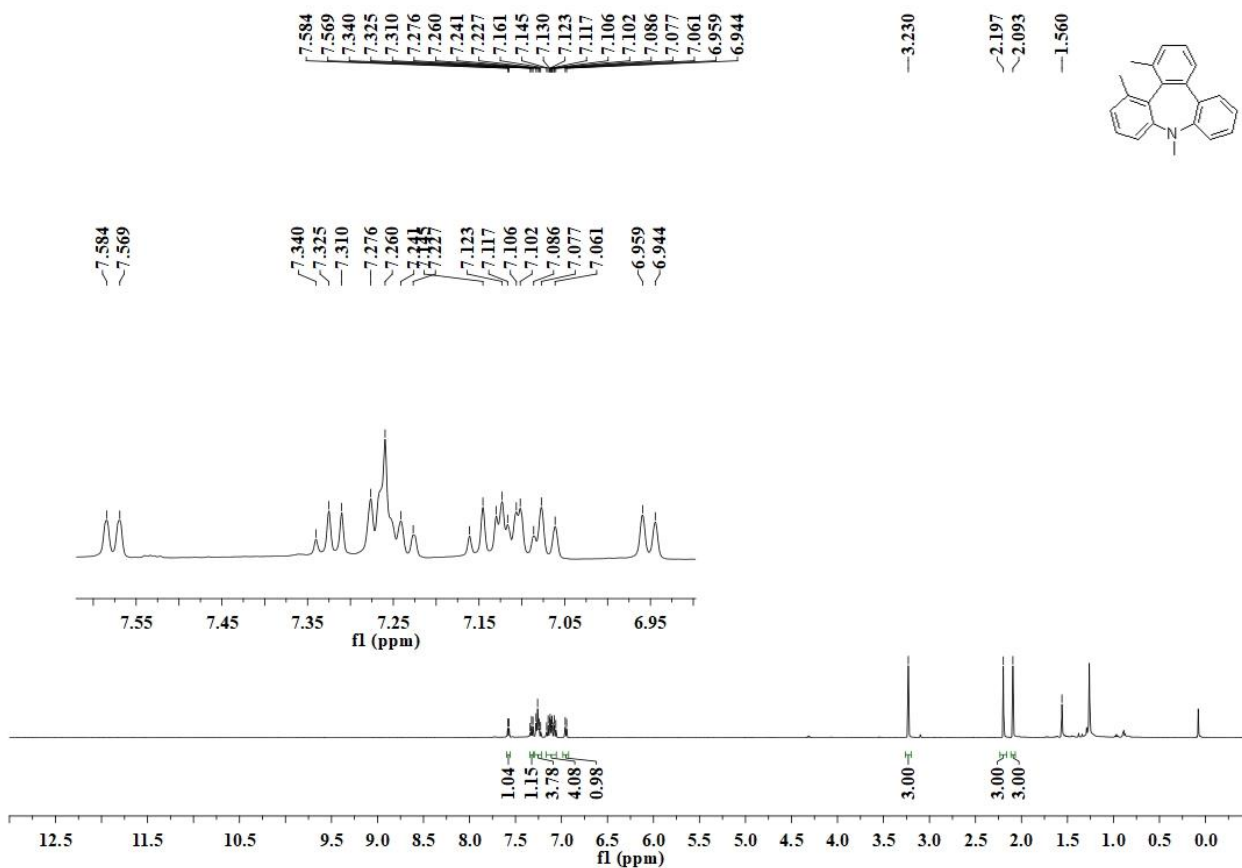

$^{13}\text{C}$  NMR (125 MHz,  $\text{CDCl}_3$ ) of **4d**

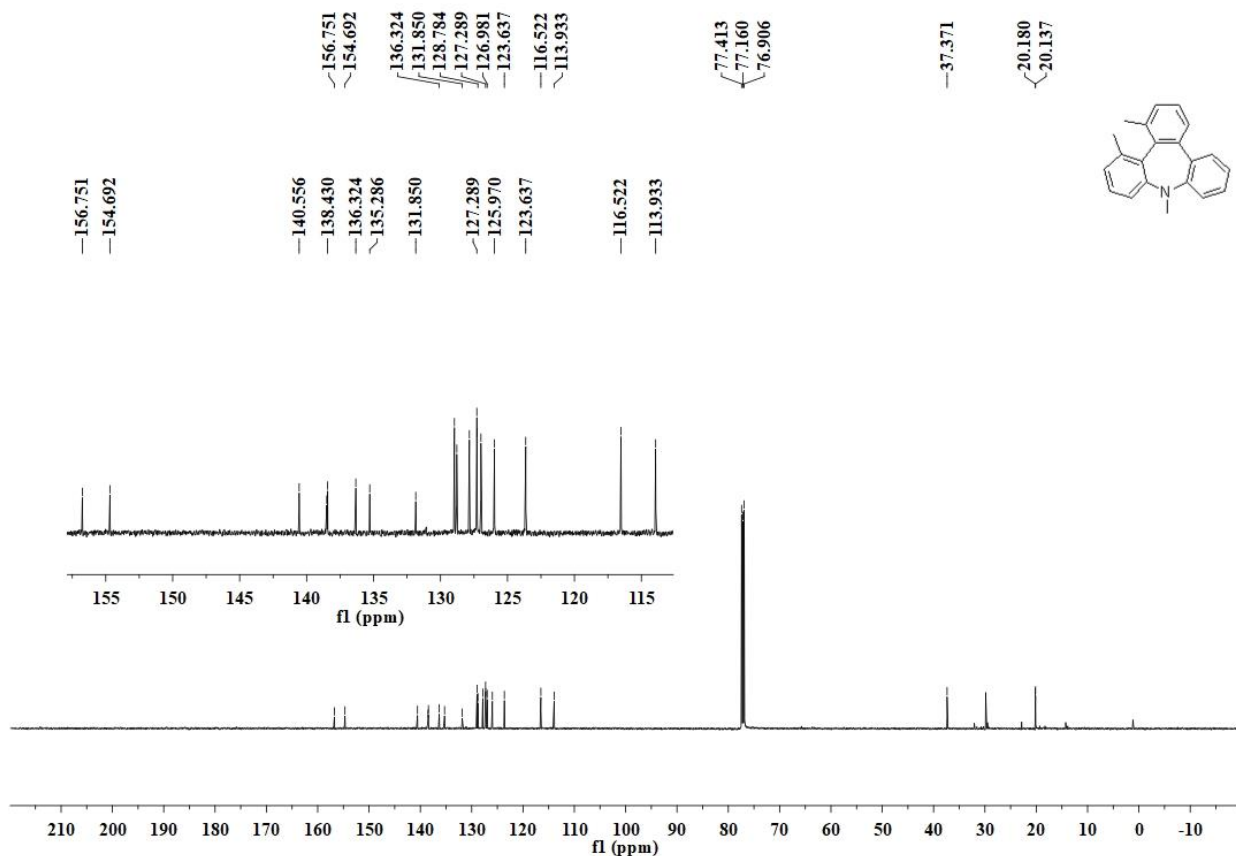

$^1\text{H}$  NMR (500 MHz,  $\text{CDCl}_3$ ) of **4e**

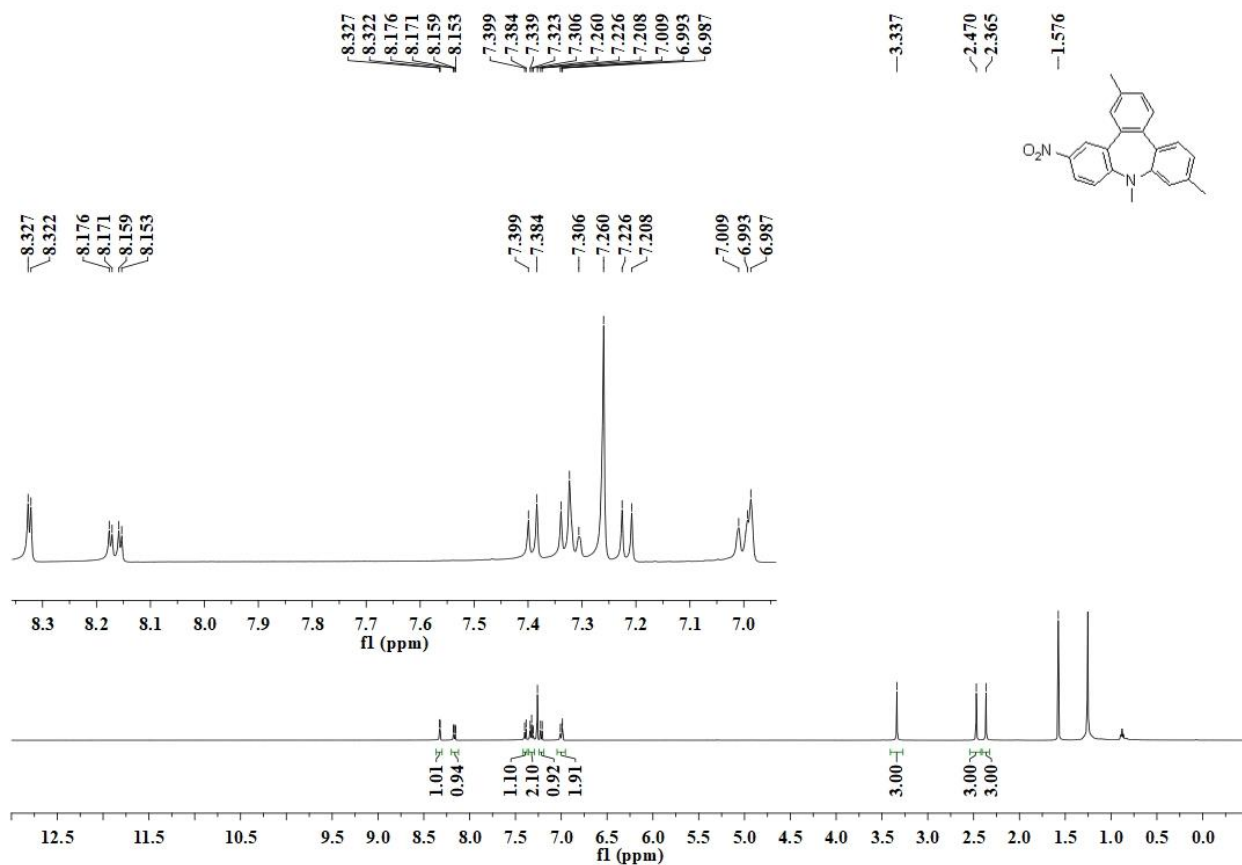

$^{13}\text{C}$  NMR (125 MHz,  $\text{CDCl}_3$ ) of **4e**

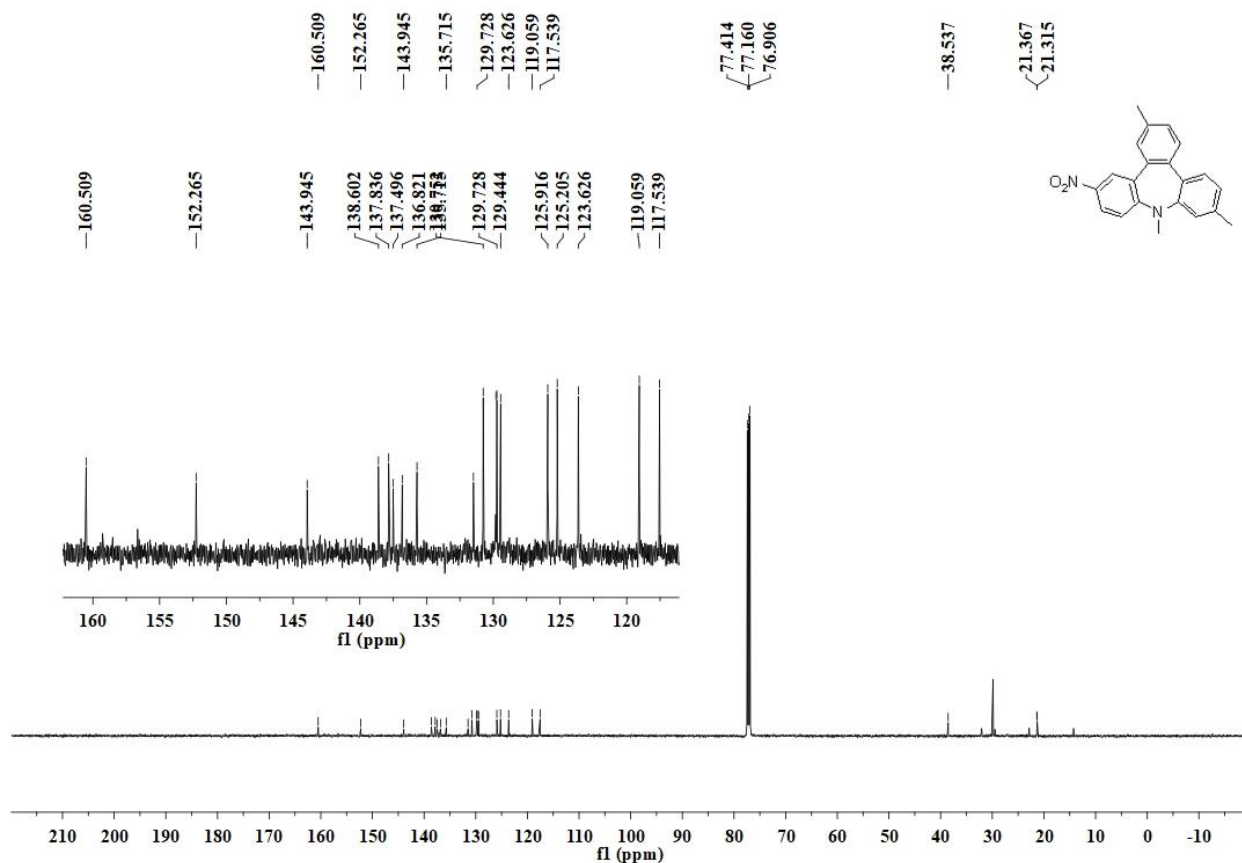

$^1\text{H}$  NMR (500 MHz,  $\text{CDCl}_3$ ) of **4f**

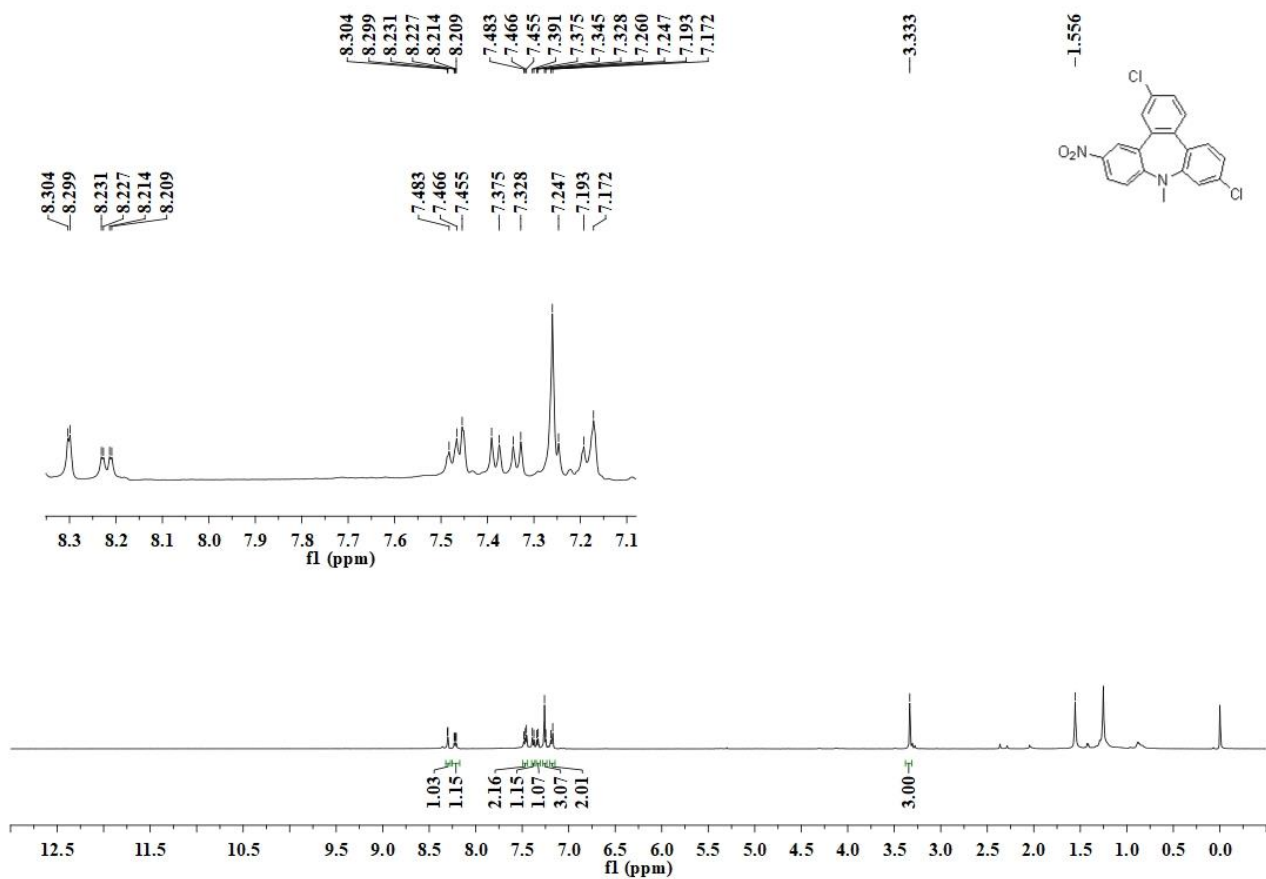

$^{13}\text{C}$  NMR (125 MHz,  $\text{CDCl}_3$ ) of **4f**

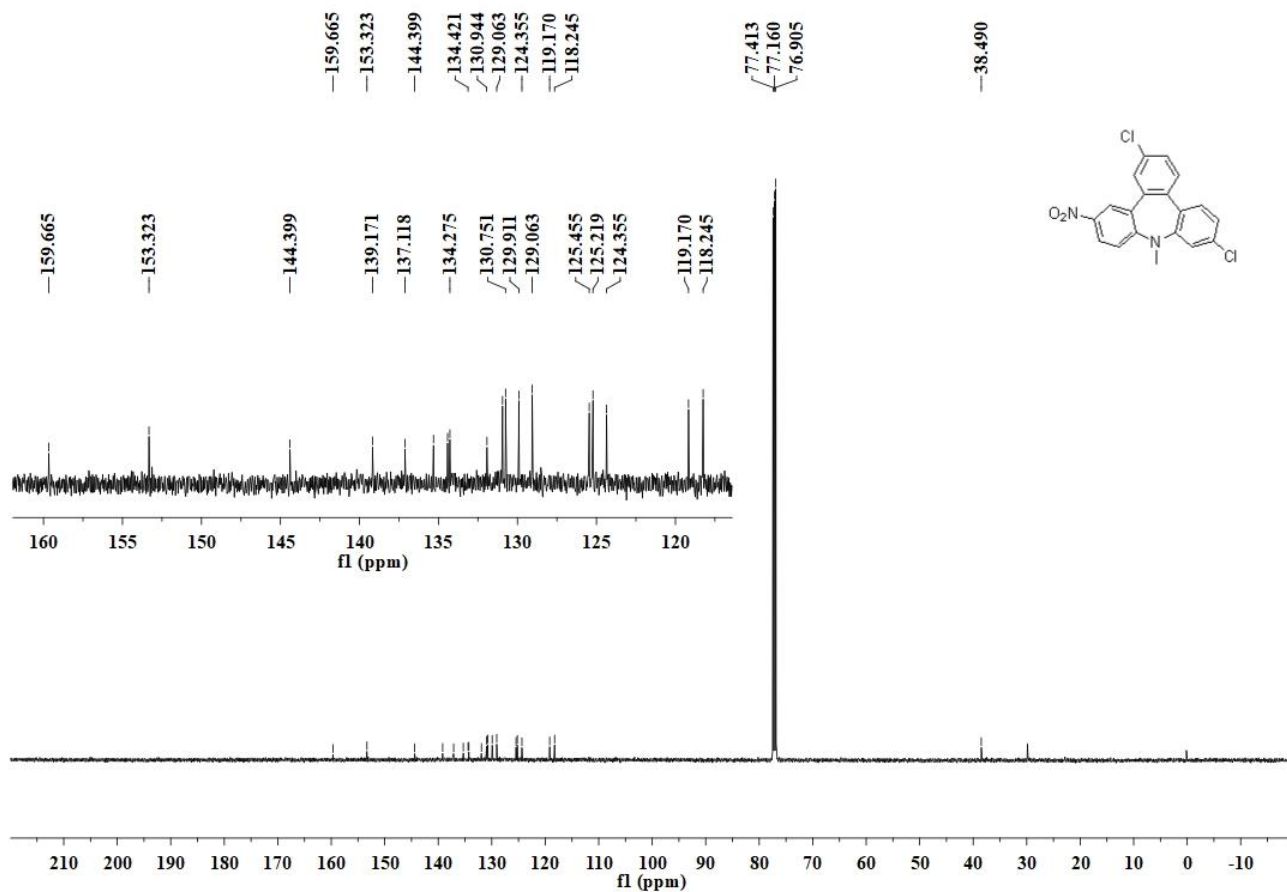

$^1\text{H}$  NMR (500 MHz,  $\text{CDCl}_3$ ) of **4g** and **4g'**

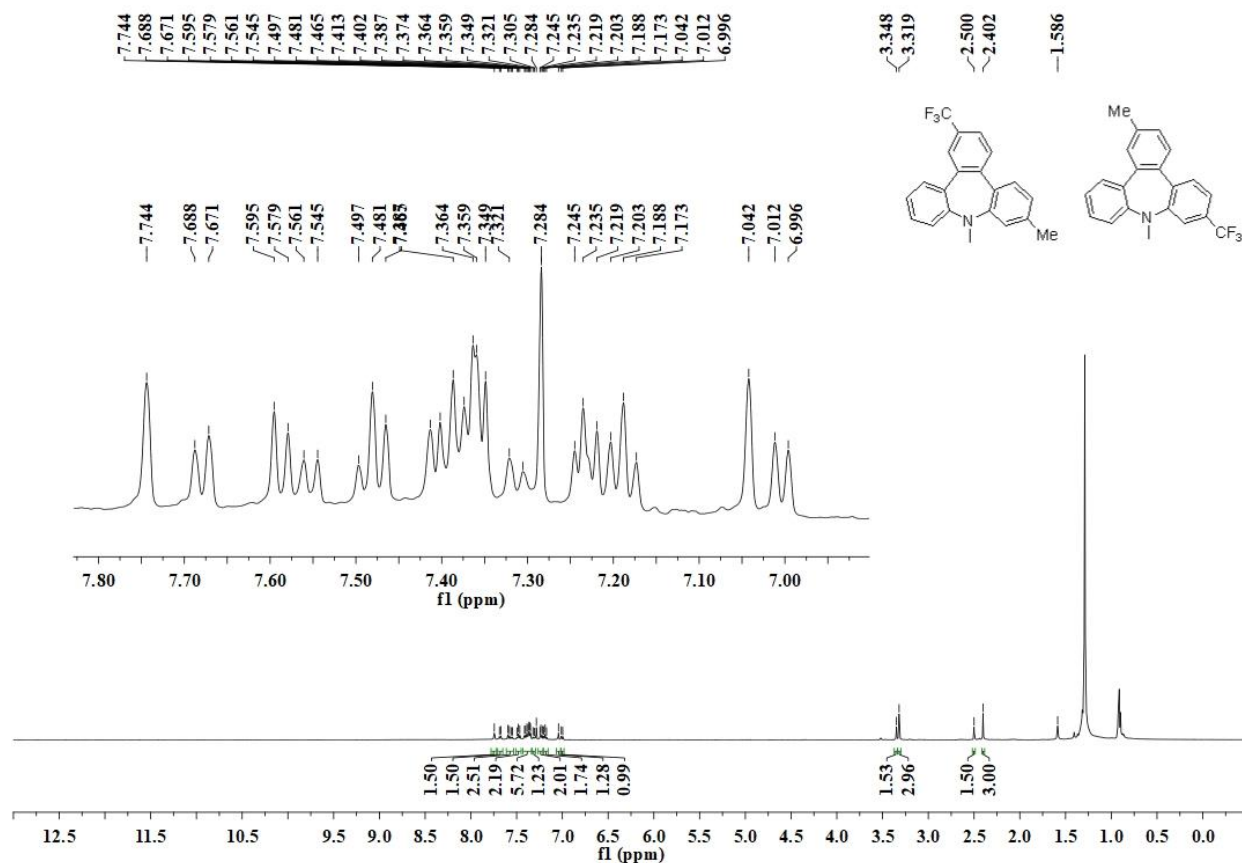

$^{13}\text{C}$  NMR (125 MHz,  $\text{CDCl}_3$ ) of **4g** and **4g'**

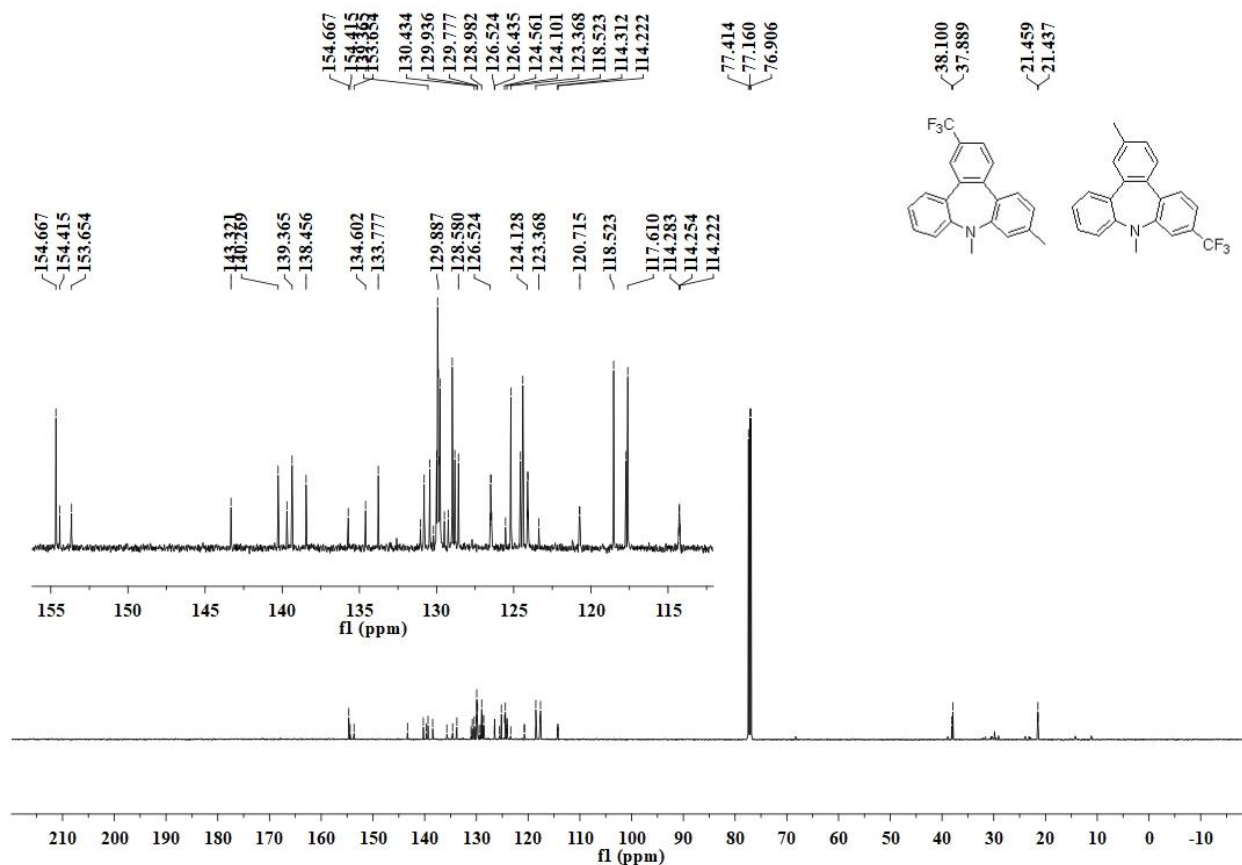

$^1\text{H}$  NMR (500 MHz,  $\text{CDCl}_3$ ) of **4h**

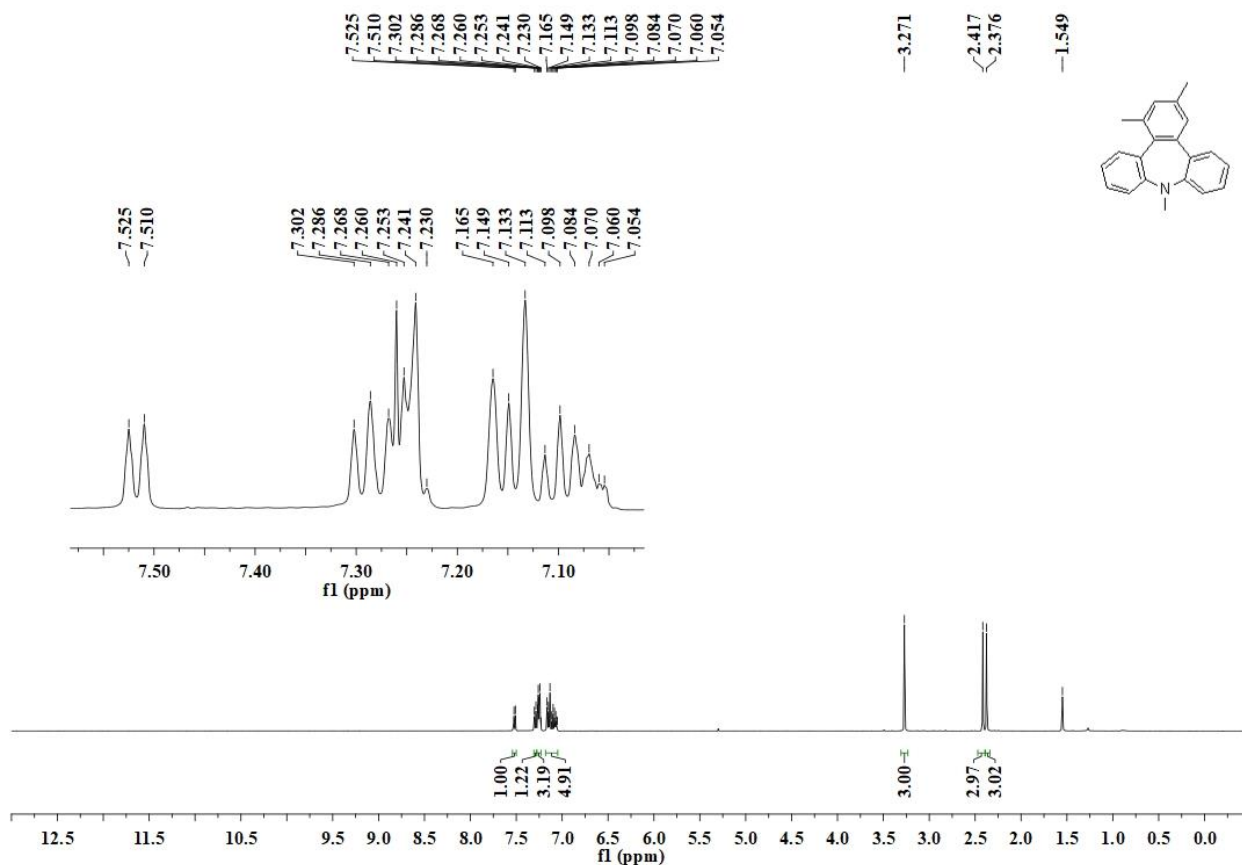

$^{13}\text{C}$  NMR (125 MHz,  $\text{CDCl}_3$ ) of **4h**

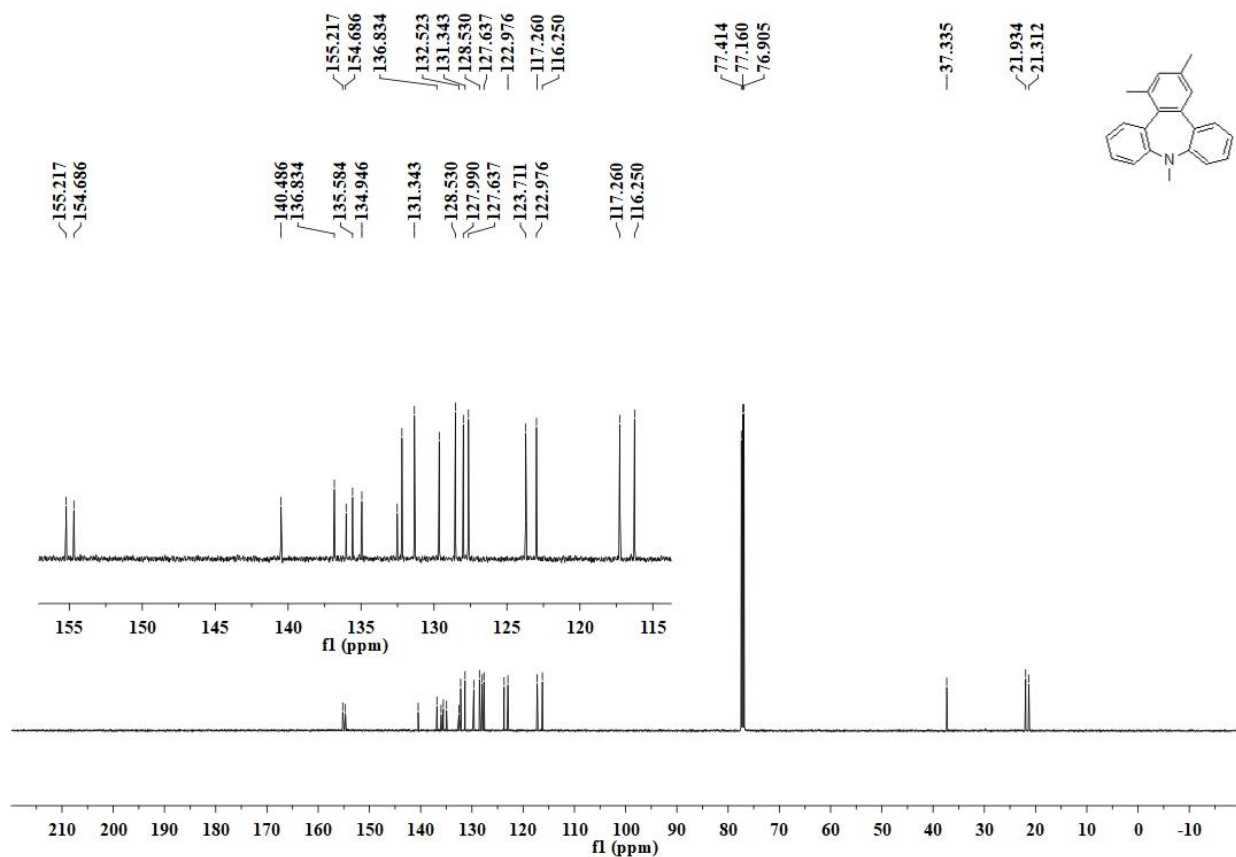



H-H NOESY (500 MHz, CDCl<sub>3</sub>) of **4h**

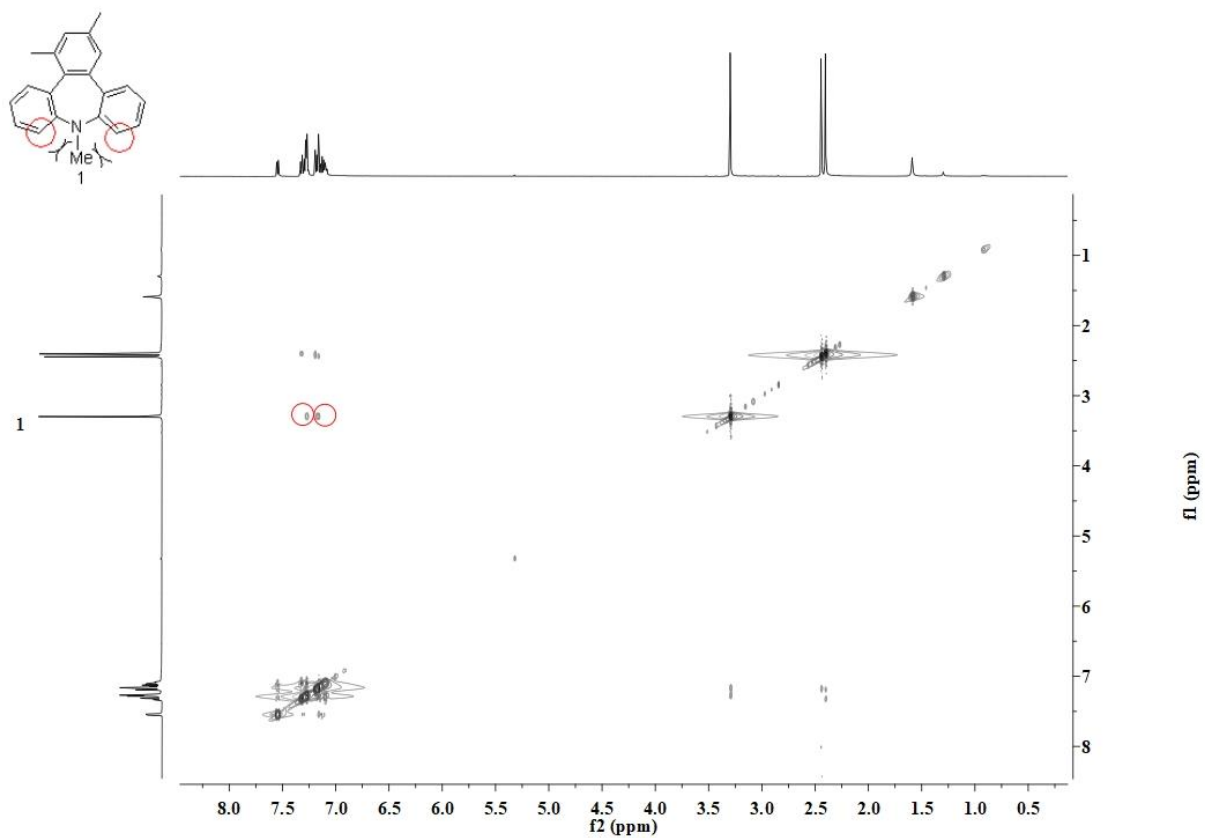

$^1\text{H}$  NMR (500 MHz,  $\text{CDCl}_3$ ) of **4i**

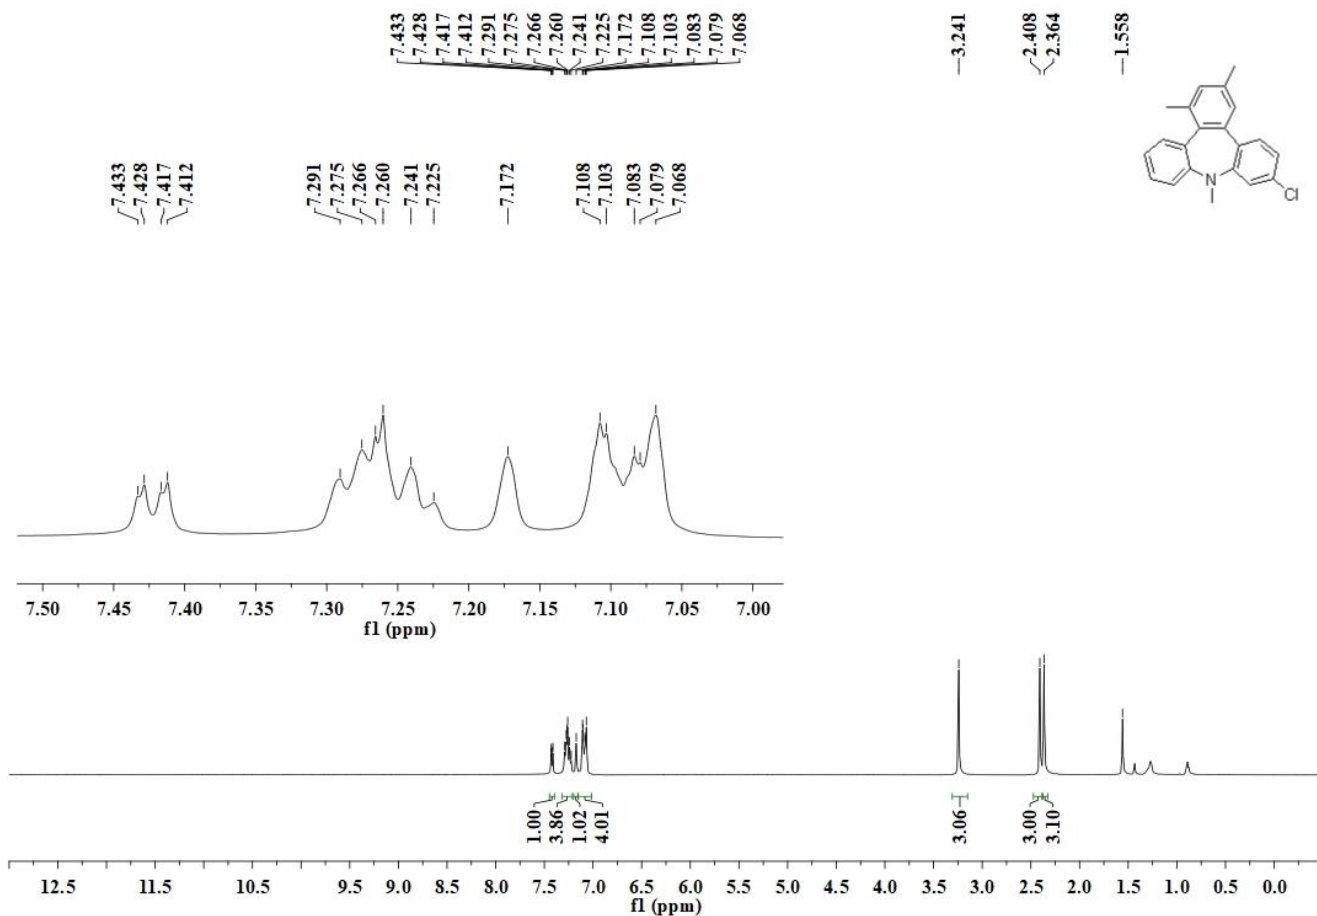

$^{13}\text{C}$  NMR (125 MHz,  $\text{CDCl}_3$ ) of **4i**

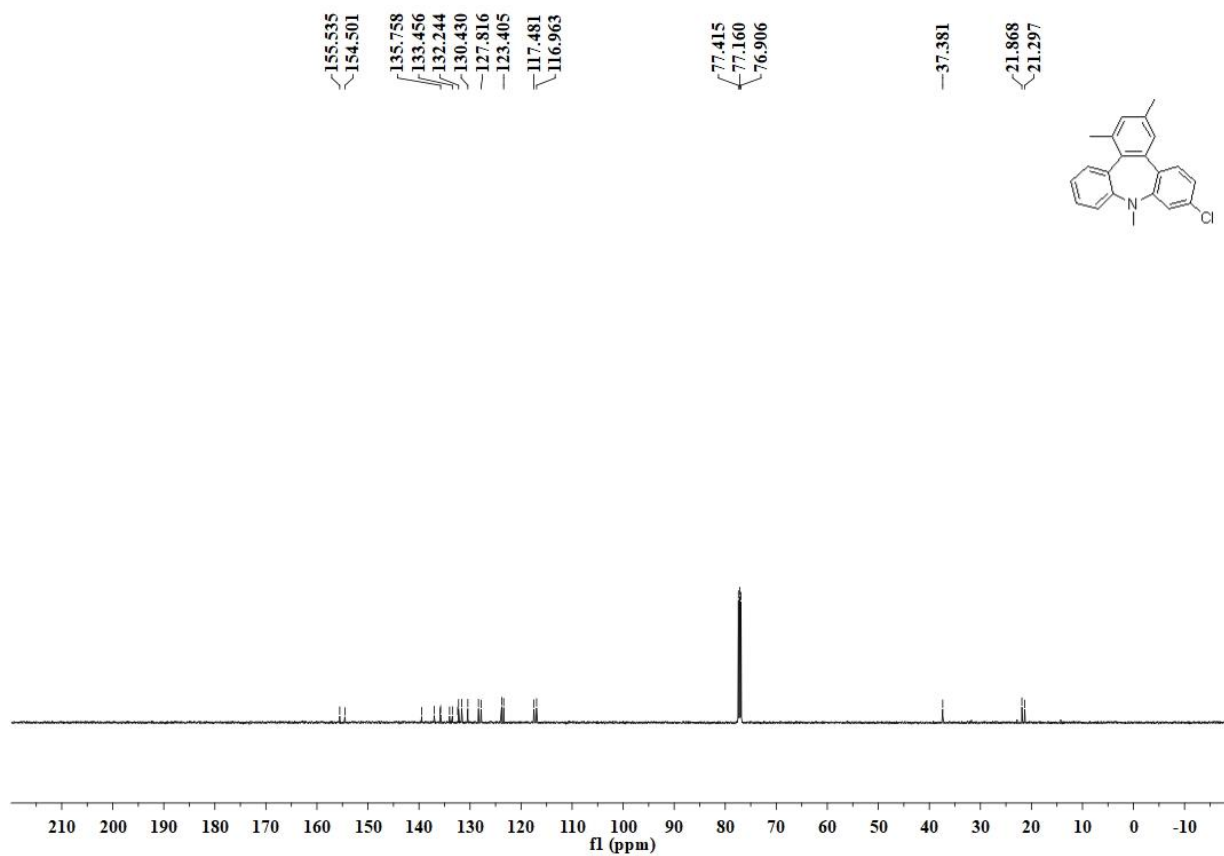

$^1\text{H}$  NMR (500 MHz,  $\text{CDCl}_3$ ) of **4j**

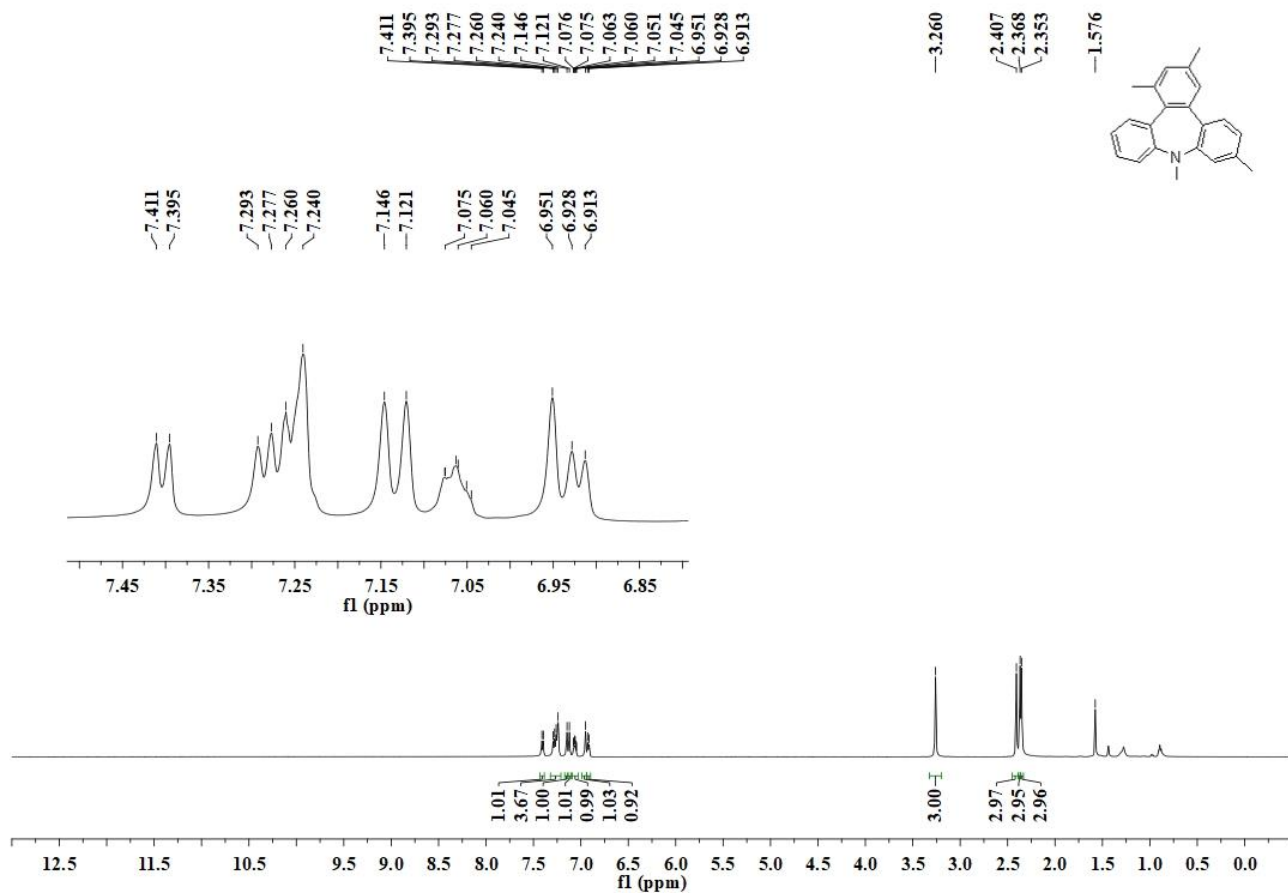

$^{13}\text{C}$  NMR (125 MHz,  $\text{CDCl}_3$ ) of **4j**

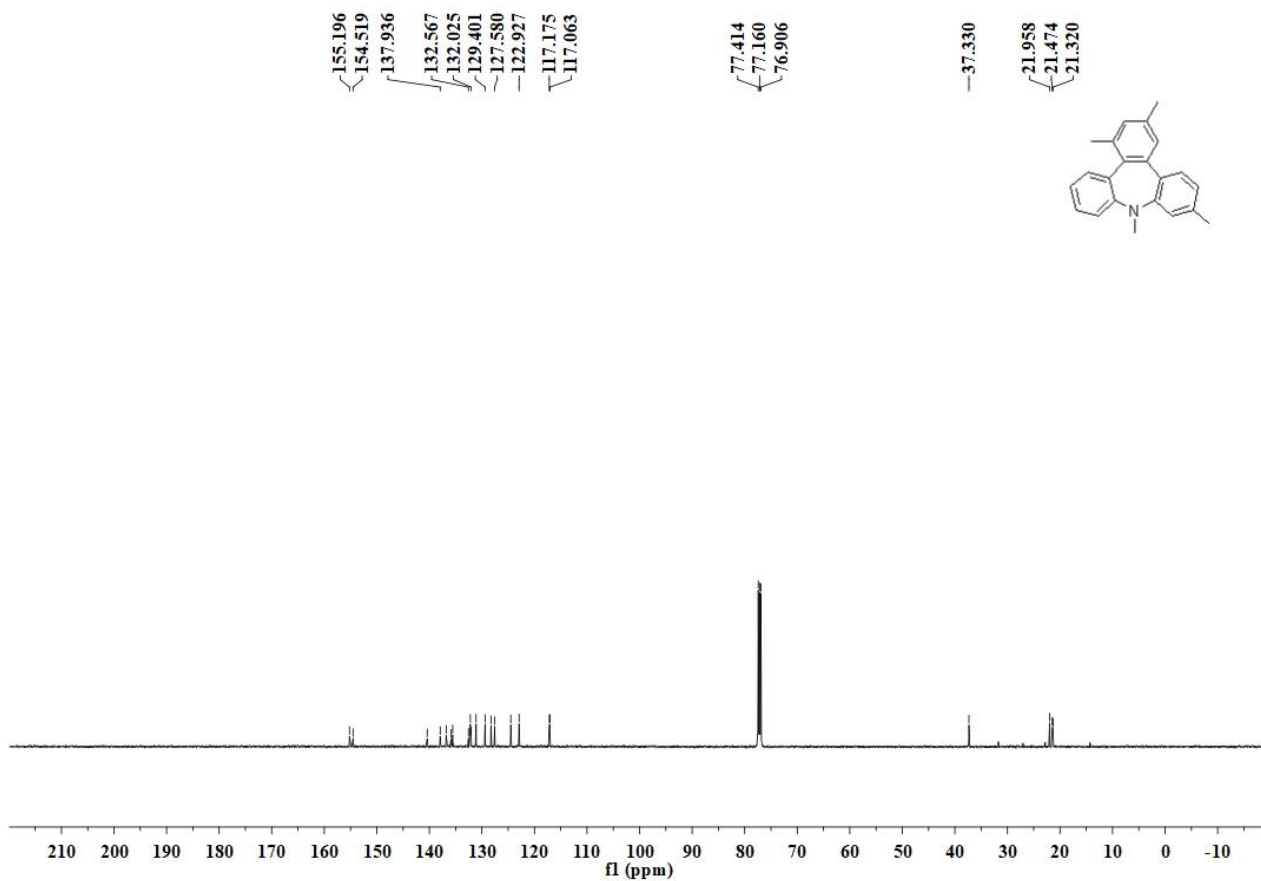

Supplement: d2qo01185a2.pdf [file d2qo01185a2.pdf]
