# Supplementary material for: Palladium-catalysed dual ring-opening [3 + 4] annulation of isatoic anhydrides with cyclic iodoniums to build tribenzo[b,d,f]azepines and a mechanistic DFT study
Source: Royal Society of Chemistry journal article supplement (doi:10.1039/d2qo01185a), 2022-01-01
Supplement: d2qo01185a1.pdf [file d2qo01185a1.pdf]

## Supporting Information

### **Palladium-catalysed dual ring-opening [3 + 4] annulation of isatoic anhydrides with cyclic iodoniums to build tribenzo[*b,d,f*]azepines and mechanistic DFT study**

Lingyu Huang, Ya-Nan Tian, Shiyan Ren, Jingwei Wang, Yi Xiao, Qiping Zhu,\* and Shiqing Li\*

*Guangxi Key Laboratory of Electrochemical and Magneto-Chemical Functional Materials,  
College of Chemistry and Bioengineering, Guilin University of Technology, Guilin 541004, P. R.  
China.*

*E-mail: [lisq@glut.edu.cn](mailto:lisq@glut.edu.cn)*

#### **Table of contents**

|                                                                       |    |
|-----------------------------------------------------------------------|----|
| I Computational Details .....                                         | S2 |
| II Reference .....                                                    | S2 |
| III The DFT calculated energies of all optimized structures.....      | S3 |
| IV The Cartesian coordinates (xyz) for all optimized structures ..... | S5 |

## I Computational Details

All density functional theory calculations were performed with the Gaussian 09 program.<sup>[1]</sup> Geometry optimizations were carried out at the BP86<sup>[2]</sup>/def2-SVP<sup>[3]</sup> level of theory and frequency calculations were carried out to confirm stationary points as local minima (showing no imaginary frequencies) or transition states (showing one imaginary frequencies) at the same level of theory. For every transition state, intrinsic reaction coordinate (IRC) calculations were employed to confirm the connection between two corresponding minima. Single-point energy calculation is performed to refine the relative energy results at the BP86-L/def2-TZVP level of theory. The solvation effect of acetonitrile was simulated by the SMD continuum solvent model.<sup>[4]</sup> A correction of 4.3 kcal/mol applies to per component change for a reaction at 298.15 K and 1 atm, i.e., a reaction from m to n components has an additional correction of  $(n-m) \times 4.3$  kcal/mol.<sup>[5]</sup> The 3D optimized structural figures in this paper were displayed by the CYLview visualization program.<sup>[6]</sup>

## II Reference

[1] M. J. Frisch, G. W. Trucks, H. B. Schlegel, G. E. Scuseria, M. A. Robb, J. R. Cheeseman, G. Scalmani, V. Barone, B. Mennucci, G. A. Petersson, H. Nakatsuji, M. Caricato, X. Li, H.P. Hratchian, A. F. Izmaylov, J. Bloino, G. Zheng, J. L. Sonnenberg, M. Hada, M. Ehara, K. Toyota, R. Fukuda, J. Hasegawa, M. Ishida, T. Nakajima, Y. Honda, O. Kitao, H. Nakai, T. Vreven, J. Montgomery, Jr. A., J. E. Peralta, F. Ogliaro, M. Bearpark, J. J. Heyd, E. Brothers, K. N. Kudin, V. N. Staroverov, T. Keith, R. Kobayashi, J. Normand, K. Raghavachari, A. Rendell, J. C. Burant, S. S. Iyengar, J. Tomasi, M. Cossi, N. Rega, J. M. Millam, M. Klene, J. E. Knox, J. B. Cross, V. Bakken, C. Adamo, J. Jaramillo, R. Gomperts, R. E. Stratmann, O. Yazyev, A. J. Austin, R. Cammi, C. Pomelli, J. W. Ochterski, R. L. Martin, K. Morokuma, V. G. Zakrzewski,

G. A. Voth, J.J.D. P. Salvador, S. Dannenberg, A. D. Daniels, O. Farkas, J. B. Foresman, J. V. Ortiz, J. Cioslowski and D. J. Fox, Gaussian 09, Revision D.01., Gaussian 09, Revision D.01, Gaussian, Inc.: Wallingford CT (2013).

[2] J. P. Perdew, Density-Functional Approximation for the Correlation Energy of the Inhomogeneous Electron Gas, *Phys. Rev. B.*, 1986, **33**, 8822–8824.

[3] F. Weigend and R. Ahlrichs, Balanced Basis Sets of Split Valence, Triple Zeta Valence and Quadruple Zeta Valence Quality for H to Rn: Design and Assessment of Accuracy, *Phys. Chem. Chem. Phys.*, 2005, **7**, 3297–3305.

[4] A. V. Marenich, C. J. Cramer and D. G. Truhlar, Universal Solvation Model Based on Solute Electron Density and on a Continuum Model of the Solvent Defined by the Bulk Dielectric Constant and Atomic Surface Tensions, *J. Phys. Chem., B* 2009, **113**, 6378–6396.

[5] R. L. Martin, P.J. Hay and L. R. Pratt, Hydrolysis of Ferric Ion in Water and Conformational Equilibrium, *J. Phys. Chem., A* 1998, **102**, 3565–3573.

[6] C.Y. Legault, CYLview, 1.0b; (Université de Sherbrooke, 2009) Online at <http://www.cylview.org>

### III The DFT calculated energies of all optimized structures.

**Table SX.** The DFT calculated energies of all optimized structures

| Species                   | G <sub>c</sub><br>hartree | E <sub>SP</sub> + G <sub>SOL</sub><br>hartree | Final G<br>hartree |
|---------------------------|---------------------------|-----------------------------------------------|--------------------|
| <b>1a</b>                 | 0.108739                  | -627.9218924                                  | -627.8063009       |
| <b>CO<sub>2</sub></b>     | -0.009384                 | -188.6783446                                  | -188.6808761       |
| <b>2a</b>                 | 0.131086                  | -1721.907797                                  | -1721.769858       |
| <b>CO</b>                 | -0.014248                 | -113.3539174                                  | -113.3613129       |
| <b>PPh<sub>3</sub></b>    | 0.219084                  | -1036.622002                                  | -1036.396065       |
| <b>1</b>                  | 0.454197                  | -2201.383358                                  | -2200.922309       |
| <b>TS1<sub>A</sub></b>    | 0.590432                  | -2829.309408                                  | -2828.712123       |
| <b>IM1<sub>A</sub></b>    | 0.59124                   | -2829.336483                                  | -2828.738391       |
| <b>TS2<sub>A</sub> -1</b> | 0.342015                  | -1792.615782                                  | -1792.266914       |
| <b>TS2<sub>A</sub> -2</b> | 0.342654                  | -1792.62856                                   | -1792.279053       |

|                          |          |              |              |
|--------------------------|----------|--------------|--------------|
| <b>IM2<sub>A</sub>-1</b> | 0.342135 | -1792.640972 | -1792.291984 |
| <b>IM2<sub>A</sub>-2</b> | 0.337853 | -1792.655821 | -1792.311116 |
| <b>TS1<sub>B</sub></b>   | 0.592132 | -2829.31519  | -2828.716206 |
| <b>IM1<sub>B</sub></b>   | 0.5913   | -2829.318814 | -2828.720662 |
| <b>TS2<sub>B</sub>-1</b> | 0.342262 | -1792.618911 | -1792.269797 |
| <b>TS2<sub>B</sub>-2</b> | 0.342629 | -1792.644926 | -1792.295444 |
| <b>IM2<sub>B</sub>-1</b> | 0.343536 | -1792.647199 | -1792.29681  |
| <b>IM2<sub>B</sub>-2</b> | 0.336797 | -1792.662088 | -1792.318439 |

- The **G<sub>C</sub>** designates the Gibbs Free Energy at BP86/def2-SVP level.
- The **E<sub>SP</sub> + G<sub>SOL</sub>** designates the sum of single point energy at BP86/def2-TZVP level and the solvation free energy calculated by SMD continuum solvent mode.
- The **Final G** designates the sum of **E<sub>SP</sub> + G<sub>SOL</sub>, G<sub>C</sub>** and the 4.3 kcal/mol entropy correction.

## IV The Cartesian coordinates (xyz) for all optimized structures

|           |             |             |             |          |             |             |             |   |             |             |             |
|-----------|-------------|-------------|-------------|----------|-------------|-------------|-------------|---|-------------|-------------|-------------|
|           |             |             |             | H        | -1.14952800 | -2.87836700 | 0.90415100  | C | 4.72760400  | -1.32164900 | -3.12424200 |
| <b>1a</b> |             |             |             |          |             |             |             | H | 4.73428900  | -1.54962400 | -0.96130000 |
|           |             |             |             |          |             |             |             | C | 2.90655600  | -0.00836200 | -4.06092800 |
| C         | 3.09922400  | -0.02142100 | -0.00001200 | <b>I</b> |             |             |             | H | 1.45462300  | 0.76364000  | -2.62644800 |
| C         | 2.67235300  | -1.36485700 | -0.00001400 |          |             |             |             | C | 4.07706700  | -0.76877600 | -4.24067200 |
| C         | 1.31050700  | -1.69679900 | -0.00000600 | Pd       | 0.00019000  | -0.02942300 | 0.06311200  | H | 5.64005200  | -1.92474900 | -3.25890700 |
| C         | 0.33282600  | -0.67147600 | 0.00000400  | P        | 2.29084700  | -0.01108200 | 0.02308700  | H | 2.38614600  | 0.42036500  | -4.93242300 |
| C         | 0.76484500  | 0.68242200  | 0.00000100  | P        | -2.29013400 | -0.01312200 | 0.01903000  | H | 4.47744300  | -0.93694600 | -5.25332700 |
| C         | 2.14020500  | 0.99580100  | -0.00000400 | C        | 3.07597200  | 1.59726600  | 0.52442900  | C | 3.13108000  | -1.25124100 | 1.12294500  |
| N         | -1.03744100 | -0.95593800 | 0.00002200  | C        | 4.24504300  | 2.11708000  | -0.07294700 | C | 4.31878300  | -0.98279800 | 1.83765700  |
| C         | -2.02003600 | 0.04487600  | -0.00001300 | C        | 2.44741100  | 2.32946600  | 1.55806500  | C | 2.52671700  | -2.52380100 | 1.24715200  |
| O         | -1.56658900 | 1.34670400  | -0.00002400 | C        | 4.77902700  | 3.34355100  | 0.36343200  | C | 4.89467400  | -1.97274300 | 2.65507000  |
| C         | -0.22601800 | 1.77022300  | 0.00001300  | H        | 4.73774400  | 1.56517800  | -0.88906400 | H | 4.79420200  | 0.00776500  | 1.76162700  |
| O         | -0.00411000 | 2.95821500  | 0.00003000  | C        | 2.98954800  | 3.54735500  | 1.99945600  | C | 3.11055100  | -3.51367300 | 2.05427500  |
| O         | -3.21134700 | -0.17498000 | -0.00003200 | H        | 1.51620100  | 1.93742200  | 2.00188600  | H | 1.58229200  | -2.72347900 | 0.71249500  |
| C         | -1.50631800 | -2.34295100 | 0.00003100  | C        | 4.15642800  | 4.05833800  | 1.40143200  | C | 4.29565100  | -3.23963800 | 2.76215300  |
| H         | 4.17223800  | 0.22212300  | -0.00001800 | H        | 5.68827900  | 3.74291000  | -0.11428800 | H | 5.81833200  | -1.74926300 | 3.21304800  |
| H         | 3.41674800  | -2.17694400 | -0.00002100 | H        | 2.49102300  | 4.10713900  | 2.80706600  | H | 2.63045000  | -4.50166800 | 2.14086100  |
| H         | 1.01268600  | -2.75350000 | -0.00000900 | H        | 4.57611700  | 5.01938400  | 1.73957000  | H | 4.74763700  | -4.01243300 | 3.40443000  |
| H         | 2.41997100  | 2.06034700  | -0.00000400 | C        | 3.04537600  | -0.34683300 | -1.64174700 | C | -3.03505100 | 1.38152300  | -0.95726200 |
| H         | -2.60968800 | -2.31812200 | 0.00001200  | C        | 4.21820100  | -1.11037800 | -1.82963000 | C | -2.39279300 | 2.63934900  | -0.88199500 |
| H         | -1.14950600 | -2.87838800 | -0.90406800 | C        | 2.38835500  | 0.19364900  | -2.77155300 | C | -4.18532900 | 1.24544700  | -1.76488500 |

|   |             |             |             |           |             |             |             |                       |             |             |             |
|---|-------------|-------------|-------------|-----------|-------------|-------------|-------------|-----------------------|-------------|-------------|-------------|
| C | -2.90340500 | 3.74309000  | -1.58397600 | H         | -1.63489000 | -1.15146800 | 2.58875700  | F                     | -4.73578900 | -0.11845300 | -1.23305700 |
| H | -1.47535000 | 2.73715500  | -0.27677300 | C         | -4.29957100 | 0.26056000  | 4.24178500  | H                     | 4.18851600  | 2.69128600  | 0.20836700  |
| C | -4.68725000 | 2.35056700  | -2.47689900 | H         | -5.76873800 | 1.58733800  | 3.33386300  | C                     | 3.28719400  | 0.01782000  | 0.08402300  |
| H | -4.68937000 | 0.26937400  | -1.84505100 | H         | -2.68694600 | -1.06695600 | 4.86533700  | C                     | 2.53206300  | -1.17526600 | -0.01024200 |
| C | -4.05145600 | 3.60069300  | -2.38536600 | H         | -4.75277700 | 0.31378200  | 5.24467600  | C                     | 4.68543000  | -0.10198900 | 0.26649800  |
| H | -2.39411800 | 4.71776000  | -1.51521700 |           |             |             |             | C                     | 3.11271600  | -2.44650000 | 0.07061500  |
| H | -5.58201700 | 2.23065400  | -3.10890900 |           |             |             |             | C                     | 5.28319900  | -1.36736400 | 0.34919700  |
| H | -4.44560300 | 4.46374400  | -2.94557800 | <b>2a</b> |             |             |             | H                     | 5.30937100  | 0.80165300  | 0.34536400  |
| C | -3.08466200 | -1.52226900 | -0.71975300 |           |             |             |             | C                     | 4.50472200  | -2.53755900 | 0.25270700  |
| C | -4.30901400 | -2.05865900 | -0.26502600 | C         | 1.13892500  | 1.22534600  | -0.19186600 | H                     | 2.50352900  | -3.36140000 | -0.00302600 |
| C | -2.40865000 | -2.15779300 | -1.78673200 | C         | 0.29716200  | 2.33112400  | -0.28814200 | H                     | 6.37212100  | -1.44513700 | 0.49199300  |
| C | -4.85094700 | -3.20537100 | -0.87377900 | C         | 2.54037300  | 1.28342000  | -0.01214000 | H                     | 4.98208100  | -3.52763200 | 0.32036000  |
| H | -4.83917300 | -1.58251600 | 0.57495100  | C         | 0.90004300  | 3.60059900  | -0.19958300 | I                     | 0.42218900  | -0.79906200 | -0.28810900 |
| C | -2.95796000 | -3.29572000 | -2.39996200 | H         | -0.79016900 | 2.21715800  | -0.41551400 |                       |             |             |             |
| H | -1.43575700 | -1.75615900 | -2.11832100 | C         | 3.10220400  | 2.58119900  | 0.06790200  |                       |             |             |             |
| C | -4.18012900 | -3.82314700 | -1.94354500 | C         | 2.29182200  | 3.72073900  | -0.02544100 | <b>CO<sub>2</sub></b> |             |             |             |
| H | -5.80406300 | -3.61909500 | -0.50656700 | H         | 0.26444700  | 4.49702700  | -0.26560900 |                       |             |             |             |
| H | -2.42189800 | -3.78120400 | -3.23125300 | H         | 2.75116700  | 4.71901300  | 0.04242300  | C                     | 0.00000000  | 0.00000000  | 0.00000000  |
| H | -4.60565700 | -4.72240500 | -2.41720600 | O         | -3.15263500 | 1.80738600  | 0.48962900  | O                     | 0.00000000  | 0.00000000  | 1.17537900  |
| C | -3.13159200 | 0.13354000  | 1.66964500  | S         | -2.71208600 | 0.39404300  | 0.45475100  | O                     | 0.00000000  | 0.00000000  | -1.17537900 |
| C | -4.29026300 | 0.90977900  | 1.89065100  | O         | -2.23619400 | -0.25983100 | 1.69843400  |                       |             |             |             |
| C | -2.55750600 | -0.56936200 | 2.75428000  | O         | -1.75582700 | 0.11996100  | -0.75157700 |                       |             |             |             |
| C | -4.86790400 | 0.97349400  | 3.17223300  | C         | -4.22776100 | -0.60607600 | -0.09103700 | <b>CO</b>             |             |             |             |
| H | -4.74137700 | 1.47457300  | 1.05941500  | F         | -3.88420900 | -1.89409300 | -0.28286000 |                       |             |             |             |
| C | -3.14331400 | -0.51315000 | 4.02919400  | F         | -5.16833500 | -0.54739100 | 0.86509500  | C                     | 0.00000000  | 0.00000000  | -0.65281700 |

|                        |             |             |             |   |             |             |             |   |             |            |             |
|------------------------|-------------|-------------|-------------|---|-------------|-------------|-------------|---|-------------|------------|-------------|
| O                      | 0.00000000  | 0.00000000  | 0.48961300  | H | -3.41563000 | -2.39500600 | -3.19903200 | C | 2.57310900  | 1.54451700 | 1.00677400  |
|                        |             |             |             | H | -3.39468800 | -4.01041800 | -2.37426500 | C | 2.12791200  | 2.81389500 | 0.56853900  |
|                        |             |             |             | H | -4.48832900 | -2.69502300 | -1.78710800 | C | 3.29821400  | 1.45638200 | 2.21583300  |
| <b>IM1<sub>A</sub></b> |             |             |             | C | 3.13119100  | 0.30002100  | -1.55970400 | C | 2.41375500  | 3.96733800 | 1.31623400  |
|                        |             |             |             | C | 4.10157500  | 1.31961700  | -1.68874100 | H | 1.55772700  | 2.90434400 | -0.36946200 |
| Pd                     | -0.21210400 | -0.58338400 | -0.60792700 | C | 2.91039500  | -0.59038700 | -2.63832100 | C | 3.57070000  | 2.61309600 | 2.96880100  |
| P                      | 2.13182800  | 0.05728700  | -0.01172700 | C | 4.83307000  | 1.45349900  | -2.88246900 | H | 3.65742000  | 0.47847400 | 2.57121600  |
| P                      | -1.54862500 | 1.16440700  | 0.08514100  | H | 4.29165500  | 2.01477400  | -0.85704600 | C | 3.13230100  | 3.87080600 | 2.52188100  |
| C                      | -1.54665500 | -4.85640900 | 2.02044400  | C | 3.65004500  | -0.44961900 | -3.82460800 | H | 2.06530600  | 4.94775000 | 0.95454300  |
| C                      | -2.84381500 | -4.35929500 | 1.79941100  | H | 2.16872700  | -1.40094000 | -2.53109700 | H | 4.13844300  | 2.52718900 | 3.90928100  |
| C                      | -3.09652700 | -3.54856900 | 0.68358900  | C | 4.60798500  | 0.57183900  | -3.95351900 | H | 3.35047800  | 4.77582600 | 3.11092200  |
| C                      | -2.06109900 | -3.20138000 | -0.21454800 | H | 5.58590400  | 2.25335600  | -2.97115700 | C | -1.48362300 | 1.66665000 | 1.86809900  |
| C                      | -0.74989100 | -3.70610700 | -0.00136200 | H | 3.47095100  | -1.14960700 | -4.65629400 | C | -0.47167200 | 1.15878000 | 2.70826000  |
| C                      | -0.52482800 | -4.54574100 | 1.11303600  | H | 5.18179700  | 0.67968500  | -4.88807200 | C | -2.46470600 | 2.52737700 | 2.41642900  |
| N                      | -2.39629900 | -2.43003300 | -1.37314900 | C | 3.00186100  | -1.31678700 | 0.87221900  | C | -0.42632000 | 1.51641400 | 4.06718000  |
| C                      | -1.76724100 | -1.25331800 | -1.72187400 | C | 2.27677600  | -2.07619000 | 1.81657500  | H | 0.28060600  | 0.47134700 | 2.29336500  |
| O                      | 0.68987200  | -2.30577700 | -1.37882700 | C | 4.36537300  | -1.60888700 | 0.65111300  | C | -2.41428200 | 2.88724600 | 3.77293400  |
| C                      | 0.41073100  | -3.52547100 | -0.97439900 | C | 2.91281800  | -3.09406000 | 2.54777200  | H | -3.28303600 | 2.90389700 | 1.78236400  |
| O                      | 1.05737700  | -4.51374700 | -1.31781800 | H | 1.20174500  | -1.88215800 | 1.96602300  | C | -1.39385300 | 2.38386400 | 4.60074100  |
| O                      | -2.03063700 | -0.63736400 | -2.75250600 | C | 4.99538500  | -2.63433200 | 1.37634500  | H | 0.37017500  | 1.10997300 | 4.70982000  |
| C                      | -3.49148000 | -2.91646700 | -2.22666500 | H | 4.93513300  | -1.03518700 | -0.09658000 | H | -3.18348900 | 3.55792500 | 4.18812700  |
| H                      | -1.34042500 | -5.50747600 | 2.88494000  | C | 4.27284600  | -3.37476800 | 2.32889300  | H | -1.35982400 | 2.66250600 | 5.66608900  |
| H                      | -3.66386600 | -4.61000900 | 2.49117100  | H | 2.33669200  | -3.68052900 | 3.28086300  | C | -1.18792000 | 2.69452400 | -0.90006400 |
| H                      | -4.11365600 | -3.17276200 | 0.49579300  | H | 6.05775700  | -2.85967200 | 1.19110600  | C | -1.11159900 | 3.98608000 | -0.33565600 |
| H                      | 0.48200000  | -4.97590600 | 1.22885600  | H | 4.76819700  | -4.18071700 | 2.89346900  | C | -0.97496700 | 2.52588600 | -2.28969300 |

|                        |             |             |             |   |             |             |             |   |             |             |             |
|------------------------|-------------|-------------|-------------|---|-------------|-------------|-------------|---|-------------|-------------|-------------|
| C                      | -0.82716800 | 5.09636600  | -1.15131800 | P | 1.21682000  | 1.46183200  | 0.05597600  | H | -5.09939100 | -0.21252400 | -0.77456500 |
| H                      | -1.26042400 | 4.12844100  | 0.74548700  | C | 1.94255200  | -1.12494800 | -1.63653600 | C | -3.60420700 | -2.99357400 | -3.07829700 |
| C                      | -0.69700000 | 3.64172000  | -3.09773000 | O | 0.16869200  | -2.59684500 | -1.25831800 | H | -1.69469100 | -2.58440200 | -2.10083200 |
| H                      | -1.04552900 | 1.51726000  | -2.73192600 | C | 0.21361300  | -3.36222300 | -0.19780600 | C | -4.96988400 | -2.67568000 | -3.15747800 |
| C                      | -0.61953300 | 4.92732800  | -2.53152300 | O | -0.69954500 | -4.08088400 | 0.20547800  | H | -6.57226300 | -1.41991300 | -2.37611600 |
| H                      | -0.76713900 | 6.10068700  | -0.70188600 | O | 2.01605100  | -0.64802800 | -2.75543600 | H | -3.17891300 | -3.77638400 | -3.72641900 |
| H                      | -0.53480300 | 3.50113600  | -4.17813800 | C | 3.86846400  | -3.72228800 | 0.46879400  | H | -5.62279900 | -3.20449600 | -3.87059800 |
| H                      | -0.39505300 | 5.79886000  | -3.16706600 | C | 2.71569500  | -3.03981700 | -0.02236600 | C | -3.04369200 | 1.21741100  | -0.05899700 |
| C                      | -3.38166100 | 0.94361900  | -0.13681800 | C | 2.93169600  | -2.08648800 | -1.07795100 | C | -3.91211900 | 1.60510700  | 0.98349900  |
| C                      | -4.13179800 | 1.67368900  | -1.08118800 | C | 4.23000200  | -1.94031300 | -1.63239100 | C | -2.83153000 | 2.10266400  | -1.14182700 |
| C                      | -4.03401900 | -0.01759200 | 0.66861600  | C | 5.33571500  | -2.64170600 | -1.14796400 | C | -4.55301100 | 2.85754500  | 0.94421200  |
| C                      | -5.51546300 | 1.45340100  | -1.20998600 | C | 5.14367300  | -3.52685200 | -0.07281700 | H | -4.09041600 | 0.92563800  | 1.83111500  |
| H                      | -3.63795900 | 2.41787100  | -1.72374600 | H | 3.75469700  | -4.45995100 | 1.27275200  | C | -3.47634000 | 3.34959900  | -1.18079000 |
| C                      | -5.41648000 | -0.22817900 | 0.54247100  | H | 4.34071500  | -1.22228000 | -2.45878200 | H | -2.15234200 | 1.81250400  | -1.96040800 |
| H                      | -3.45774400 | -0.60307200 | 1.40337000  | H | 6.33065400  | -2.49822300 | -1.59643600 | C | -4.33760600 | 3.73228900  | -0.13489800 |
| C                      | -6.16202700 | 0.50680700  | -0.39872200 | H | 5.99267400  | -4.09453400 | 0.34164800  | H | -5.23133300 | 3.14703400  | 1.76313700  |
| H                      | -6.08943600 | 2.03031200  | -1.95254600 | N | 1.46641000  | -3.35616400 | 0.53740000  | H | -3.30079700 | 4.02761800  | -2.03088300 |
| H                      | -5.91590000 | -0.97040700 | 1.18590200  | C | 1.43135400  | -4.12217700 | 1.78552700  | H | -4.84225100 | 4.71120500  | -0.16371200 |
| H                      | -7.24636000 | 0.33965500  | -0.49829700 | H | 1.71053800  | -5.19058900 | 1.64339700  | C | -2.54669300 | -1.21265600 | 1.50183100  |
|                        |             |             |             | H | 2.11616700  | -3.66806000 | 2.52943900  | C | -3.29036700 | -2.40678900 | 1.61097000  |
|                        |             |             |             | H | 0.39536100  | -4.10057900 | 2.16357300  | C | -1.97597100 | -0.64481800 | 2.66670300  |
| <b>IM1<sub>B</sub></b> |             |             |             | C | -3.29363400 | -1.31516300 | -1.33358800 | C | -3.48087400 | -3.00847400 | 2.86733500  |
|                        |             |             |             | C | -4.67084000 | -0.99784500 | -1.41624400 | H | -3.70865800 | -2.87767400 | 0.70938800  |
| Pd                     | 0.28192500  | -0.53482400 | -0.63071500 | C | -2.76293700 | -2.32008600 | -2.17327800 | C | -2.17919200 | -1.24495100 | 3.92006000  |
| P                      | -2.18320700 | -0.42569500 | -0.13305900 | C | -5.50199400 | -1.67674800 | -2.32169500 | H | -1.37053200 | 0.27354100  | 2.59615800  |



|   |             |             |             |                |             |             |             |   |             |             |             |
|---|-------------|-------------|-------------|----------------|-------------|-------------|-------------|---|-------------|-------------|-------------|
| C | -2.93299600 | -2.42864900 | 4.02390900  | H              | -0.85442600 | 3.66284300  | 5.00808100  | H | 3.88975400  | 2.83345100  | -1.86119400 |
| H | -4.05855300 | -3.94380700 | 2.93751100  | C              | 3.04574600  | 1.39399200  | 0.37304000  | H | 2.14138100  | 3.17686500  | -1.80561700 |
| H | -1.73694600 | -0.78755900 | 4.81949700  | C              | 3.93318900  | 2.40486300  | -0.05466200 | H | 3.15884700  | 3.45331200  | -0.34382800 |
| H | -3.08497100 | -2.90328200 | 5.00658200  | C              | 3.55596100  | 0.28755600  | 1.09000700  | C | 3.76380100  | 0.65840800  | -0.30224800 |
| C | 1.03702600  | 2.83067700  | -1.18211800 | C              | 5.30454000  | 2.31400900  | 0.24246200  | C | 4.99521100  | 1.29267000  | 0.06086600  |
| C | 0.94669100  | 2.47276500  | -2.54701900 | H              | 3.55563800  | 3.26564400  | -0.62705700 | C | 3.70109800  | -0.77427800 | -0.15344100 |
| C | 1.03166400  | 4.19799500  | -0.82253000 | C              | 4.92401600  | 0.20900400  | 1.39989300  | C | 6.09988900  | 0.56023000  | 0.51110700  |
| C | 0.84308000  | 3.47034100  | -3.53235300 | H              | 2.87546800  | -0.52371800 | 1.39483400  | H | 5.08398100  | 2.38520900  | -0.00890800 |
| H | 0.98176300  | 1.40899500  | -2.83621400 | C              | 5.80138700  | 1.22211100  | 0.97503100  | C | 4.83710300  | -1.48334500 | 0.28462600  |
| C | 0.92104800  | 5.18951000  | -1.81303100 | H              | 5.98870300  | 3.10540900  | -0.10329500 | C | 6.03534700  | -0.84004500 | 0.62415400  |
| H | 1.11010000  | 4.49381200  | 0.23508000  | H              | 5.30605300  | -0.66084900 | 1.95644200  | H | 7.02443400  | 1.09717500  | 0.78106200  |
| C | 0.82394100  | 4.82835400  | -3.16874400 | H              | 6.87651100  | 1.15461800  | 1.20573100  | H | 4.73967500  | -2.57877200 | 0.33986500  |
| H | 0.77638600  | 3.17933100  | -4.59273000 |                |             |             |             | H | 6.90522000  | -1.41979800 | 0.96960100  |
| H | 0.91277000  | 6.25198500  | -1.52114300 |                |             |             |             | C | -1.35487300 | -1.15300800 | 1.50680600  |
| H | 0.73702600  | 5.60780700  | -3.94266300 | <b>IM2_A-1</b> |             |             |             | C | -0.43806500 | -0.87806300 | 2.54476400  |
| C | 0.58315200  | 2.19969100  | 1.64644600  |                |             |             |             | C | -2.24926100 | -2.23910500 | 1.63342400  |
| C | 1.26946200  | 2.01025700  | 2.86815200  | P              | -1.37414700 | -0.07425600 | 0.01582700  | C | -0.42549900 | -1.67309600 | 3.70248500  |
| C | -0.63333400 | 2.92213300  | 1.65740900  | C              | 0.29420100  | 2.61939700  | 0.14799700  | H | 0.28068000  | -0.05006900 | 2.43435100  |
| C | 0.75227400  | 2.52924200  | 4.06765200  | O              | 0.02172600  | 3.67838000  | 0.52644200  | C | -2.23168100 | -3.03075500 | 2.79403900  |
| H | 2.22408100  | 1.46383400  | 2.88808900  | C              | 2.50414600  | -1.61544400 | -0.48884300 | H | -2.95291300 | -2.47185400 | 0.81890600  |
| C | -1.14108600 | 3.44756700  | 2.85810300  | O              | 1.29800800  | -1.04655900 | -0.52458700 | C | -1.32198200 | -2.74888200 | 3.82877300  |
| H | -1.18876700 | 3.08868000  | 0.72280500  | O              | 2.59347500  | -2.82866200 | -0.69180800 | H | 0.29894500  | -1.45797400 | 4.50350600  |
| C | -0.45362200 | 3.25118300  | 4.06816100  | Pd             | 0.80183100  | 0.88461100  | -0.32785000 | H | -2.92773000 | -3.87957300 | 2.88527300  |
| H | 1.30558300  | 2.37315100  | 5.00752600  | N              | 2.72093700  | 1.38196000  | -0.86408700 | H | -1.30418400 | -3.37765500 | 4.73308200  |
| H | -2.08610000 | 4.01249300  | 2.83971200  | C              | 2.98526300  | 2.77160800  | -1.21422900 | C | -1.99480100 | -1.14803800 | -1.35707700 |

|               |             |             |             |    |             |             |             |   |             |             |             |
|---------------|-------------|-------------|-------------|----|-------------|-------------|-------------|---|-------------|-------------|-------------|
| C             | -1.17767100 | -2.21074700 | -1.81645700 | Pd | 1.04763500  | 0.07869900  | 0.36004200  | C | -2.04345400 | -0.74236500 | -3.89827400 |
| C             | -3.26678700 | -0.94039100 | -1.93890200 | O  | 1.56035700  | 3.09873700  | -1.16148600 | H | -0.69643600 | -1.45180600 | -2.33450500 |
| C             | -1.64129600 | -3.04700600 | -2.84489400 | O  | 2.64215500  | 1.68315100  | -2.69590100 | C | -3.64241600 | 0.96889000  | -3.23867600 |
| H             | -0.17813200 | -2.36460300 | -1.37800500 | C  | 2.10203600  | 2.37139800  | -1.91352200 | H | -3.57078400 | 1.59853400  | -1.15854000 |
| C             | -3.71665800 | -1.78494500 | -2.96889100 | C  | 3.01590100  | 0.29801700  | 0.73032200  | C | -3.09807700 | 0.12952500  | -4.22585500 |
| H             | -3.91457600 | -0.12368700 | -1.58684900 | C  | 3.64756000  | 1.34813700  | 1.41300900  | H | -1.60983800 | -1.39935800 | -4.66912800 |
| C             | -2.90598600 | -2.83855600 | -3.42412900 | C  | 3.81192600  | -0.76890200 | 0.24191900  | H | -4.46667800 | 1.65594400  | -3.48903000 |
| H             | -0.99822000 | -3.86910700 | -3.19684000 | C  | 5.05014600  | 1.33932700  | 1.60688200  | H | -3.49360700 | 0.15766300  | -5.25381200 |
| H             | -4.71024400 | -1.61597300 | -3.41383900 | H  | 3.05468400  | 2.19342000  | 1.80298600  | C | -2.16254800 | -1.52092400 | 0.85809900  |
| H             | -3.26054200 | -3.49826500 | -4.23219600 | C  | 5.20538900  | -0.79568900 | 0.42539600  | C | -3.39839600 | -2.02897700 | 0.40203500  |
| C             | -2.72409300 | 1.15448800  | 0.29942100  | C  | 5.81722700  | 0.27314400  | 1.11501700  | C | -1.50465100 | -2.15720700 | 1.93417000  |
| C             | -2.89723700 | 2.19129200  | -0.64801000 | H  | 5.53626100  | 2.16979900  | 2.14390500  | C | -3.97202700 | -3.15183400 | 1.02372500  |
| C             | -3.56596200 | 1.10665200  | 1.43113900  | H  | 5.81879600  | -1.62641300 | 0.04431900  | H | -3.91017900 | -1.54952500 | -0.44742700 |
| C             | -3.90447600 | 3.15302900  | -0.47161200 | H  | 6.90877600  | 0.26304100  | 1.26420300  | C | -2.08505300 | -3.27422400 | 2.55750200  |
| H             | -2.24080300 | 2.24581500  | -1.53253000 | P  | -1.35516600 | -0.03840100 | 0.10648300  | H | -0.52402700 | -1.77795000 | 2.26837200  |
| C             | -4.56721000 | 2.07870200  | 1.60820700  | N  | 3.08101500  | -1.77316500 | -0.43199200 | C | -3.31908600 | -3.77321100 | 2.10313500  |
| H             | -3.43834400 | 0.30851800  | 2.17842300  | C  | 3.71668500  | -2.94139300 | -1.02872700 | H | -4.93428800 | -3.54556300 | 0.65909500  |
| C             | -4.74054500 | 3.09975000  | 0.65881500  | H  | 4.46232800  | -2.63525800 | -1.79351300 | H | -1.56400600 | -3.76485600 | 3.39495400  |
| H             | -4.03210500 | 3.95297700  | -1.21791600 | H  | 4.23288100  | -3.54966700 | -0.25503700 | H | -3.76926900 | -4.65505100 | 2.58639600  |
| H             | -5.21568400 | 2.03435500  | 2.49751400  | H  | 2.93168600  | -3.55289800 | -1.50863400 | C | -2.10597800 | 1.39973800  | 1.00258000  |
| H             | -5.52555900 | 3.85923300  | 0.80072800  | C  | 1.71194400  | -1.58604700 | -0.51416800 | C | -3.20301400 | 1.28317100  | 1.88372700  |
|               |             |             |             | O  | 0.94083600  | -2.35740600 | -1.06766300 | C | -1.50644600 | 2.66813400  | 0.81121500  |
|               |             |             |             | C  | -2.08056000 | 0.06239000  | -1.59393600 | C | -3.69599500 | 2.41693000  | 2.55449400  |
| <b>IM2A-2</b> |             |             |             | C  | -1.52912400 | -0.77595900 | -2.59165600 | H | -3.67256900 | 0.30128900  | 2.05071500  |
|               |             |             |             | C  | -3.13886700 | 0.93679100  | -1.92558900 | C | -2.00713100 | 3.79836600  | 1.47827400  |

|                          |             |             |             |   |             |             |             |                          |             |             |             |
|--------------------------|-------------|-------------|-------------|---|-------------|-------------|-------------|--------------------------|-------------|-------------|-------------|
| H                        | -0.64103100 | 2.77492000  | 0.13486500  | H | -3.73567500 | -3.28527500 | 2.90902200  | C                        | 5.31083800  | 0.01218400  | -0.14566200 |
| C                        | -3.10214700 | 3.67486700  | 2.35280200  | H | -2.50191100 | -2.57806100 | 4.97848900  | C                        | 5.86033400  | 1.26901200  | -0.43622000 |
| H                        | -4.55124400 | 2.31349800  | 3.24138200  | C | -1.93098000 | -1.13767800 | -1.36380000 | C                        | 5.02188100  | 2.37099600  | -0.65213100 |
| H                        | -1.53261300 | 4.77958700  | 1.31850600  | C | -1.27135900 | -2.38343100 | -1.51231400 | C                        | 3.62858200  | 2.19568500  | -0.55071700 |
| H                        | -3.48953500 | 4.56021100  | 2.88169500  | C | -2.99295600 | -0.80044000 | -2.23403500 | C                        | 3.05758800  | 0.94769000  | -0.23320300 |
|                          |             |             |             | C | -1.68880200 | -3.27245300 | -2.51691500 | H                        | 5.98574800  | -0.84626400 | -0.01919500 |
|                          |             |             |             | H | -0.41955500 | -2.65835800 | -0.87061200 | H                        | 6.95477700  | 1.37654900  | -0.50437300 |
| <b>IM2<sub>B</sub>-1</b> |             |             |             | C | -3.39704300 | -1.69846500 | -3.23682800 | H                        | 5.43833000  | 3.36407000  | -0.88357400 |
|                          |             |             |             | H | -3.51315900 | 0.16370700  | -2.12865000 | H                        | 2.98013900  | 3.07057800  | -0.71301900 |
| P                        | -1.36345000 | 0.02253200  | -0.04601700 | C | -2.74682000 | -2.93615300 | -3.37979000 | N                        | 3.42105100  | -1.48236600 | 0.24160600  |
| C                        | 0.77052000  | 2.37997000  | 0.62252400  | H | -1.16629900 | -4.23584300 | -2.62654100 | C                        | 4.31592800  | -2.46277600 | 0.85119000  |
| O                        | 0.63716300  | 3.41019600  | 1.13149800  | H | -4.22759900 | -1.42612400 | -3.90748200 | H                        | 5.06187400  | -2.86989500 | 0.13104800  |
| C                        | 2.20337100  | -1.99567700 | -0.27219900 | H | -3.06353700 | -3.63870500 | -4.16727200 | H                        | 4.85710900  | -2.00565800 | 1.70422600  |
| O                        | 1.37779100  | -1.13838500 | -0.84133100 | C | -2.55408700 | 1.43524700  | -0.11500300 | H                        | 3.69551300  | -3.30808200 | 1.19833800  |
| O                        | 1.94706400  | -3.20098300 | -0.19913700 | C | -2.30269200 | 2.46847100  | -1.04794800 |                          |             |             |             |
| Pd                       | 1.02609500  | 0.69190000  | -0.12054400 | C | -3.68744900 | 1.52201500  | 0.72183500  |                          |             |             |             |
| C                        | -1.74014700 | -0.84184900 | 1.54172500  | C | -3.18009300 | 3.56047900  | -1.15179800 | <b>IM2<sub>B</sub>-2</b> |             |             |             |
| C                        | -1.04215500 | -0.45538000 | 2.70830400  | H | -1.41342000 | 2.41600100  | -1.69848100 |                          |             |             |             |
| C                        | -2.70983600 | -1.86656300 | 1.62347800  | C | -4.55652600 | 2.62289300  | 0.62264400  | Pd                       | -0.91366500 | 0.34145500  | -0.54508400 |
| C                        | -1.32063900 | -1.07259500 | 3.93900000  | H | -3.89029700 | 0.72770800  | 1.45666700  | O                        | -1.06832100 | 3.47778400  | 0.67479600  |
| H                        | -0.26591200 | 0.32494100  | 2.65081000  | C | -4.30743200 | 3.64062600  | -0.31436100 | O                        | -2.22323200 | 2.26134400  | 2.32316600  |
| C                        | -2.98153800 | -2.48403200 | 2.85640800  | H | -2.97646500 | 4.35714600  | -1.88470400 | C                        | -1.64623500 | 2.84581100  | 1.48475200  |
| H                        | -3.24609400 | -2.19005500 | 0.71780800  | H | -5.43538500 | 2.68375200  | 1.28406200  | P                        | 1.30322000  | -0.15594700 | -0.06806400 |
| C                        | -2.29058700 | -2.08770100 | 4.01499500  | H | -4.99005100 | 4.50190600  | -0.38921600 | C                        | -1.87936500 | -1.13826100 | 0.43667200  |
| H                        | -0.76748700 | -0.76584000 | 4.84065900  | C | 3.90663500  | -0.18568400 | -0.04954300 | O                        | -1.25330400 | -1.94695200 | 1.08974100  |

|   |            |             |             |   |             |             |             |                        |             |             |             |
|---|------------|-------------|-------------|---|-------------|-------------|-------------|------------------------|-------------|-------------|-------------|
| C | 1.92269000 | 0.12002600  | 1.65789800  | C | 4.20303100  | 1.38534800  | -2.65627300 | <b>PPh<sub>3</sub></b> |             |             |             |
| C | 1.18442000 | -0.43430000 | 2.72989600  | H | 3.72793800  | -0.57817800 | -1.85029100 |                        |             |             |             |
| C | 3.08936000 | 0.86747200  | 1.93229000  | C | 2.78055200  | 3.22048900  | -1.92934700 | P                      | -0.00065200 | -0.00087000 | -1.22601300 |
| C | 1.61529000 | -0.24420400 | 4.05293500  | H | 1.17363800  | 2.70558800  | -0.55968900 | C                      | -1.59431700 | -0.50492000 | -0.41016700 |
| H | 0.27396000 | -1.01769500 | 2.52000800  | C | 3.86820800  | 2.74996100  | -2.68779300 | C                      | -1.68304000 | -1.36176800 | 0.70962600  |
| C | 3.51068400 | 1.05827100  | 3.26074200  | H | 5.05119400  | 1.01063400  | -3.25133500 | C                      | -2.79026600 | -0.01951200 | -0.99125000 |
| H | 3.67150500 | 1.30669000  | 1.10745800  | H | 2.50931800  | 4.28791800  | -1.95176500 | C                      | -2.93711800 | -1.71542300 | 1.23984700  |
| C | 2.77629700 | 0.50359500  | 4.32252200  | H | 4.45251700  | 3.44815700  | -3.30801800 | H                      | -0.76388300 | -1.75687200 | 1.17024200  |
| H | 1.03340000 | -0.68026800 | 4.88050100  | C | -5.59219700 | -1.83409600 | 0.53165700  | C                      | -4.04104900 | -0.36249700 | -0.45246700 |
| H | 4.42050100 | 1.64571200  | 3.46368400  | C | -4.22499800 | -1.95626600 | 0.78257300  | H                      | -2.73702000 | 0.63303900  | -1.87908000 |
| H | 3.10705700 | 0.65607400  | 5.36229800  | C | -3.31500100 | -1.03309300 | 0.20904600  | C                      | -4.11788300 | -1.21511300 | 0.66416600  |
| C | 1.86441400 | -1.86414900 | -0.48967200 | C | -3.76366200 | 0.05393400  | -0.62784700 | H                      | -2.98988100 | -2.38615900 | 2.11274700  |
| C | 2.94027700 | -2.49472500 | 0.17207000  | C | -5.17476800 | 0.14607700  | -0.87662700 | H                      | -4.96193600 | 0.02864400  | -0.91431100 |
| C | 1.18872100 | -2.54768600 | -1.52462100 | C | -6.04783300 | -0.77783700 | -0.30271800 | H                      | -5.09878700 | -1.49373700 | 1.08137600  |
| C | 3.33826200 | -3.78932300 | -0.20507600 | H | -6.30816900 | -2.54649500 | 0.96854700  | C                      | 0.35948700  | 1.63122800  | -0.41006900 |
| H | 3.46420400 | -1.97598300 | 0.99038900  | H | -3.82792800 | -2.76364200 | 1.41741000  | C                      | 1.37370000  | 2.42691100  | -0.99464000 |
| C | 1.59383600 | -3.83822100 | -1.90250900 | H | -5.56764800 | 0.94941800  | -1.51667200 | C                      | -0.33457000 | 2.13347900  | 0.71337600  |
| H | 0.33141000 | -2.06386300 | -2.02226300 | H | -7.12798200 | -0.68310500 | -0.50562400 | C                      | 1.70167400  | 3.68163300  | -0.45569100 |
| C | 2.66834300 | -4.46136800 | -1.24275000 | N | -2.81344700 | 0.88600300  | -1.10213100 | H                      | 1.90929900  | 2.05656000  | -1.88505200 |
| H | 4.17491800 | -4.27718800 | 0.32010600  | C | -3.14978600 | 1.96781100  | -2.00234000 | C                      | -0.01426800 | 3.39656400  | 1.24356500  |
| H | 1.05828400 | -4.36473400 | -2.70834600 | H | -3.61112400 | 1.60889800  | -2.95502000 | H                      | -1.13274500 | 1.53233000  | 1.17675000  |
| H | 2.97899900 | -5.47794300 | -1.53227100 | H | -3.85912700 | 2.70206200  | -1.54755700 | C                      | 1.00539600  | 4.17166000  | 0.66436600  |
| C | 2.36743700 | 0.95480000  | -1.10254500 | H | -2.23197500 | 2.52904200  | -2.27132600 | H                      | 2.49749800  | 4.28587800  | -0.92031300 |
| C | 3.45896100 | 0.48941800  | -1.86741800 |   |             |             |             | H                      | -0.56605100 | 3.77576100  | 2.11898900  |
| C | 2.02946200 | 2.32914300  | -1.14586600 |   |             |             |             | H                      | 1.25412200  | 5.16058400  | 1.08153600  |

|                        |             |             |             |   |             |             |             |   |             |             |             |
|------------------------|-------------|-------------|-------------|---|-------------|-------------|-------------|---|-------------|-------------|-------------|
| C                      | 1.23307500  | -1.12853600 | -0.41008700 | C | -1.39192000 | -1.45011300 | -1.88650800 | C | 1.98120500  | -1.51948600 | 2.36791900  |
| C                      | 1.41265800  | -2.40698400 | -0.99050400 | O | 0.09815400  | -2.41741800 | -1.63407400 | C | 4.26130100  | -1.49890700 | 1.50766100  |
| C                      | 2.01956400  | -0.77450000 | 0.70864500  | C | 0.16026500  | -3.35189800 | -0.66025900 | C | 2.39974100  | -2.29776400 | 3.46094500  |
| C                      | 2.33762200  | -3.31611600 | -0.45169400 | O | 1.21350300  | -3.94315800 | -0.43194700 | H | 0.91891500  | -1.24451200 | 2.25708200  |
| H                      | 0.82034200  | -2.68930100 | -1.87724300 | O | -1.38715500 | -0.87587400 | -2.96743800 | C | 4.67526600  | -2.28206900 | 2.59826000  |
| C                      | 2.95552400  | -1.68102200 | 1.23881200  | C | -3.72512000 | -2.12562800 | -2.18574700 | H | 4.98961400  | -1.20437500 | 0.73546600  |
| H                      | 1.89968700  | 0.21911800  | 1.16845600  | H | -2.15586100 | -5.70652400 | 2.62757500  | C | 3.74749700  | -2.67852500 | 3.57871300  |
| C                      | 3.11478700  | -2.95379800 | 0.66384000  | H | -4.39166000 | -4.85798600 | 1.82819200  | H | 1.66455700  | -2.61971100 | 4.21548800  |
| H                      | 2.46133400  | -4.30915700 | -0.91308700 | H | -4.52953900 | -3.24801800 | -0.04603800 | H | 5.72998400  | -2.59043000 | 2.67938200  |
| H                      | 3.56329200  | -1.38923500 | 2.11064700  | H | -0.05880800 | -4.93894200 | 1.41913800  | H | 4.07496900  | -3.29694700 | 4.42976100  |
| H                      | 3.84864300  | -3.66212100 | 1.08049400  | H | -3.49991500 | -1.61867100 | -3.14081000 | C | 2.84178800  | 1.66149500  | 0.43843400  |
|                        |             |             |             | H | -4.14282000 | -3.13186600 | -2.39484400 | C | 2.30368500  | 2.73279700  | -0.31216900 |
|                        |             |             |             | H | -4.47727400 | -1.52769000 | -1.62848200 | C | 3.74589100  | 1.94418600  | 1.48591300  |
| <b>TS1<sub>A</sub></b> |             |             |             | C | 3.43329000  | -0.49976200 | -1.40570100 | C | 2.68129300  | 4.05720600  | -0.03553900 |
|                        |             |             |             | C | 4.29321200  | 0.43910100  | -2.01794000 | H | 1.57715600  | 2.52544400  | -1.11508800 |
| Pd                     | -0.10019600 | -0.43881500 | -0.57291500 | C | 3.39424000  | -1.82899300 | -1.89339100 | C | 4.10939200  | 3.27303200  | 1.77015200  |
| P                      | 2.29366400  | -0.05413700 | -0.00926000 | C | 5.10456400  | 0.05585200  | -3.10088600 | H | 4.16821000  | 1.12255700  | 2.08494500  |
| P                      | -1.55531200 | 1.20595500  | 0.08843500  | H | 4.33612800  | 1.47511600  | -1.64875700 | C | 3.58338000  | 4.33096700  | 1.00863200  |
| C                      | -2.21517800 | -4.99411500 | 1.79038300  | C | 4.21451600  | -2.20191000 | -2.97087300 | H | 2.25583600  | 4.87900200  | -0.63261700 |
| C                      | -3.46289500 | -4.51823600 | 1.34174800  | H | 2.72514100  | -2.57845700 | -1.43600900 | H | 4.81301800  | 3.48046600  | 2.59251600  |
| C                      | -3.54483600 | -3.61059000 | 0.27807300  | C | 5.06818000  | -1.26448500 | -3.57997400 | H | 3.87164300  | 5.37049800  | 1.23261700  |
| C                      | -2.37144900 | -3.14229700 | -0.37039700 | H | 5.77175600  | 0.79775800  | -3.56874700 | C | -1.40776700 | 1.91109500  | 1.80438700  |
| C                      | -1.10953100 | -3.64632700 | 0.06683100  | H | 4.17614500  | -3.23905600 | -3.34051700 | C | -0.17387000 | 1.82284500  | 2.48258400  |
| C                      | -1.05483400 | -4.56324100 | 1.13895300  | H | 5.70388400  | -1.56272700 | -4.42918700 | C | -2.49389400 | 2.55401200  | 2.44464500  |
| N                      | -2.46547000 | -2.25440900 | -1.44658400 | C | 2.90990300  | -1.10197100 | 1.38884300  | C | -0.02294900 | 2.36626700  | 3.76989300  |

|   |             |             |             |                        |             |             |             |   |             |             |             |
|---|-------------|-------------|-------------|------------------------|-------------|-------------|-------------|---|-------------|-------------|-------------|
| H | 0.67636100  | 1.32477000  | 1.99500700  | C                      | -6.15191100 | 0.28053700  | 0.02670500  | H | 6.18027600  | -3.57998700 | 0.33419600  |
| C | -2.34172400 | 3.09459900  | 3.73295200  | H                      | -6.29947600 | 1.74192800  | -1.58161700 | N | 1.58291000  | -3.61259500 | 0.47830600  |
| H | -3.46805300 | 2.62832200  | 1.93705600  | H                      | -5.68403300 | -1.12158500 | 1.63038200  | C | 1.63361000  | -4.51193500 | 1.63127100  |
| C | -1.10669800 | 3.00171500  | 4.39939000  | H                      | -7.23106100 | 0.05903100  | 0.03554900  | H | 2.12486900  | -5.47796200 | 1.38190000  |
| H | 0.94881200  | 2.28600700  | 4.28181800  |                        |             |             |             | H | 2.18164400  | -4.03958100 | 2.47247100  |
| H | -3.19733800 | 3.58974900  | 4.21967600  |                        |             |             |             | H | 0.59059900  | -4.71563000 | 1.92859100  |
| H | -0.99125800 | 3.42222100  | 5.41118700  | <b>TS1<sub>B</sub></b> |             |             |             | C | -3.39390100 | -1.37822500 | -1.17579000 |
| C | -1.36508900 | 2.68287800  | -1.02456000 |                        |             |             |             | C | -4.77955300 | -1.10561600 | -1.26870200 |
| C | -1.39795300 | 4.01242000  | -0.55038400 | Pd                     | 0.15347700  | -0.53195900 | -0.55345700 | C | -2.84620500 | -2.44533000 | -1.92027900 |
| C | -1.16198200 | 2.44226500  | -2.40538400 | P                      | -2.28842000 | -0.35209600 | -0.08539200 | C | -5.60379500 | -1.89420500 | -2.08699900 |
| C | -1.23702400 | 5.08670900  | -1.44418900 | P                      | 1.30292400  | 1.36241700  | 0.05367900  | H | -5.21843100 | -0.26950700 | -0.70217800 |
| H | -1.54125800 | 4.21323200  | 0.52225500  | C                      | 1.64963600  | -1.45254200 | -1.67948300 | C | -3.67947500 | -3.23039900 | -2.73895000 |
| C | -1.00977200 | 3.52174800  | -3.29286400 | O                      | 0.25833800  | -2.67757800 | -1.20206500 | H | -1.77020700 | -2.66853800 | -1.85064700 |
| H | -1.12232500 | 1.40554100  | -2.78232800 | C                      | 0.30090300  | -3.45820700 | -0.12682100 | C | -5.05467900 | -2.95943400 | -2.82493200 |
| C | -1.04506200 | 4.84492700  | -2.81579400 | O                      | -0.68019100 | -4.04596900 | 0.31976500  | H | -6.68134100 | -1.67247300 | -2.15113200 |
| H | -1.26116600 | 6.12013800  | -1.06234500 | O                      | 1.53135500  | -1.09963300 | -2.83971000 | H | -3.24107900 | -4.06170600 | -3.31363400 |
| H | -0.85513300 | 3.32320100  | -4.36541900 | C                      | 4.02133300  | -3.60215200 | 0.43979700  | H | -5.70219100 | -3.57564900 | -3.46950300 |
| H | -0.91866900 | 5.68843900  | -3.51339300 | C                      | 2.78117300  | -3.10341100 | -0.04710200 | C | -3.08917300 | 1.31133000  | -0.28677900 |
| C | -3.38226500 | 0.86335300  | 0.01628300  | C                      | 2.83302700  | -2.10686700 | -1.07300700 | C | -4.00055700 | 1.87081100  | 0.63365200  |
| C | -4.25444500 | 1.51718200  | -0.88069400 | C                      | 4.08256900  | -1.68756000 | -1.58617200 | C | -2.77522000 | 2.02861300  | -1.46513300 |
| C | -3.91037200 | -0.10032500 | 0.90722600  | C                      | 5.28928400  | -2.19680000 | -1.09631400 | C | -4.58652600 | 3.12499600  | 0.37919300  |
| C | -5.63074700 | 1.22233500  | -0.87673600 | C                      | 5.24721500  | -3.15690900 | -0.07136200 | H | -4.25439300 | 1.32650200  | 1.55645700  |
| H | -3.86009100 | 2.26831500  | -1.58181700 | H                      | 4.02832000  | -4.37307200 | 1.22049700  | C | -3.36686100 | 3.27626200  | -1.71977100 |
| C | -5.28613900 | -0.37946300 | 0.91998600  | H                      | 4.07603900  | -0.94117500 | -2.39447700 | H | -2.05478900 | 1.60540000  | -2.18488700 |
| H | -3.23947400 | -0.63407400 | 1.60002400  | H                      | 6.24874000  | -1.85414100 | -1.51239100 | C | -4.27353800 | 3.82988700  | -0.79595500 |

|   |             |             |             |                          |             |             |             |    |             |             |             |
|---|-------------|-------------|-------------|--------------------------|-------------|-------------|-------------|----|-------------|-------------|-------------|
| H | -5.29800400 | 3.55019400  | 1.10554900  | C                        | 0.59923000  | 2.34007400  | 1.47439500  |    |             |             |             |
| H | -3.11351400 | 3.82185800  | -2.64260100 | C                        | 1.17216800  | 2.30873200  | 2.76587600  | P  | -1.37928100 | -0.01326700 | 0.06377800  |
| H | -4.73541900 | 4.81035900  | -0.99377300 | C                        | -0.57225800 | 3.10656100  | 1.26930800  | C  | 1.23304900  | 2.37635500  | -0.27658800 |
| C | -2.73248100 | -0.89113400 | 1.62973100  | C                        | 0.58840800  | 3.02743800  | 3.82431800  | O  | 1.34418400  | 3.49801000  | 0.05711800  |
| C | -3.45924600 | -2.07663200 | 1.87456100  | H                        | 2.08770100  | 1.72703500  | 2.94949700  | C  | 2.56214300  | -1.75734600 | -0.76769300 |
| C | -2.23666700 | -0.14946200 | 2.72935400  | C                        | -1.14559200 | 3.83242100  | 2.32680300  | O  | 1.30379300  | -1.39590600 | -0.95095700 |
| C | -3.70654800 | -2.49700600 | 3.19346900  | H                        | -1.03977500 | 3.14448000  | 0.27408600  | O  | 2.96752100  | -2.87919500 | -1.06931000 |
| H | -3.82549600 | -2.68081500 | 1.03138800  | C                        | -0.56963700 | 3.79408100  | 3.60925100  | Pd | 0.77617300  | 0.55706000  | -0.58622700 |
| C | -2.49832700 | -0.56753900 | 4.04419000  | H                        | 1.05236900  | 2.99270500  | 4.82311300  | N  | 2.61556000  | 1.36241700  | -0.96679600 |
| H | -1.64461600 | 0.76388700  | 2.55952900  | H                        | -2.05356800 | 4.42732500  | 2.14174000  | C  | 2.96928800  | 1.66998700  | -2.35300700 |
| C | -3.23490800 | -1.74271300 | 4.28088000  | H                        | -1.02109300 | 4.36274500  | 4.43778500  | H  | 3.91557500  | 2.25711300  | -2.38536800 |
| H | -4.27257800 | -3.42592800 | 3.36820600  | C                        | 3.06031200  | 1.12383800  | 0.60419600  | H  | 3.10621900  | 0.75259000  | -2.96884500 |
| H | -2.11475600 | 0.02711700  | 4.88860900  | C                        | 4.11426600  | 1.98201400  | 0.22365500  | H  | 2.16737600  | 2.28014600  | -2.81717700 |
| H | -3.43332700 | -2.07360800 | 5.31291200  | C                        | 3.33615200  | 0.03802500  | 1.46684500  | C  | 3.57476900  | 0.63827200  | -0.18211200 |
| C | 1.42715100  | 2.62899700  | -1.29790800 | C                        | 5.41455100  | 1.76849200  | 0.71496700  | C  | 4.58206300  | 1.37770800  | 0.47873600  |
| C | 1.37001200  | 2.18309300  | -2.63815700 | H                        | 3.92281100  | 2.82241300  | -0.46079800 | C  | 3.55804200  | -0.78666200 | -0.09310700 |
| C | 1.60093400  | 4.00775500  | -1.03388500 | C                        | 4.63197000  | -0.16095700 | 1.97022400  | C  | 5.57320100  | 0.73137400  | 1.23211000  |
| C | 1.48971900  | 3.10466600  | -3.69391200 | H                        | 2.52568200  | -0.65803000 | 1.73967800  | H  | 4.56786000  | 2.47547100  | 0.39026300  |
| H | 1.23649700  | 1.11024900  | -2.85576500 | C                        | 5.67515100  | 0.70403900  | 1.59468900  | C  | 4.58730700  | -1.41124600 | 0.64661000  |
| C | 1.71672700  | 4.92310000  | -2.09415800 | H                        | 6.22923300  | 2.44340200  | 0.40675600  | C  | 5.57464700  | -0.67207800 | 1.31447400  |
| H | 1.63826500  | 4.37111500  | 0.00493600  | H                        | 4.83041200  | -1.00864800 | 2.64433800  | H  | 6.34326400  | 1.32407400  | 1.75132100  |
| C | 1.66137500  | 4.47372800  | -3.42593700 | H                        | 6.69435800  | 0.54136700  | 1.97986800  | H  | 4.58660600  | -2.51173500 | 0.67080600  |
| H | 1.44377900  | 2.74481100  | -4.73415100 |                          |             |             |             | H  | 6.35085700  | -1.19342700 | 1.89708200  |
| H | 1.84895200  | 5.99523400  | -1.87679000 |                          |             |             |             | C  | -1.37988400 | -1.17361800 | 1.49745500  |
| H | 1.74973500  | 5.19363500  | -4.25544300 | <b>TS2<sub>A</sub>-1</b> |             |             |             | C  | -0.41995800 | -0.97950500 | 2.51611000  |

|   |             |             |             |               |             |             |             |   |             |             |             |
|---|-------------|-------------|-------------|---------------|-------------|-------------|-------------|---|-------------|-------------|-------------|
| C | -2.30125400 | -2.23809400 | 1.60203600  | C             | -4.14757400 | 2.39688800  | 2.03048200  | N | -2.69522300 | -1.71165800 | 0.19833900  |
| C | -0.39189100 | -1.83252600 | 3.63090100  | H             | -3.37279800 | 0.38043800  | 2.28397000  | C | -3.37698400 | -3.00990400 | 0.23970600  |
| H | 0.31692000  | -0.16456300 | 2.42600700  | C             | -4.10354900 | 3.57976800  | 1.27288600  | H | -4.41204300 | -2.86522300 | 0.60565600  |
| C | -2.26599600 | -3.09122100 | 2.71897100  | H             | -3.19386700 | 4.59822200  | -0.42590700 | H | -3.39985300 | -3.49575400 | -0.76009500 |
| H | -3.04089100 | -2.40761100 | 0.80394000  | H             | -4.81841200 | 2.32190200  | 2.90106500  | H | -2.82747200 | -3.66996400 | 0.93507400  |
| C | -1.31431300 | -2.88955300 | 3.73365700  | H             | -4.73970400 | 4.43587600  | 1.54828500  | C | -1.37905400 | -1.61656500 | 0.58985900  |
| H | 0.36343600  | -1.67785000 | 4.41738800  |               |             |             |             | O | -0.68191800 | -2.55321400 | 0.94029600  |
| H | -2.98358100 | -3.92388300 | 2.79111100  |               |             |             |             | C | 2.52778700  | -0.46477900 | 1.19021900  |
| H | -1.28450600 | -3.56463500 | 4.60363400  | <b>TS2A-2</b> |             |             |             | C | 2.26238900  | -1.58992500 | 2.00640900  |
| C | -2.31143700 | -0.88428500 | -1.27004400 |               |             |             |             | C | 3.73542300  | 0.25012800  | 1.35358500  |
| C | -1.63493800 | -1.89451900 | -1.99618900 | Pd            | -0.85584600 | 0.29780800  | 0.72338500  | C | 3.20380300  | -1.99248200 | 2.96730000  |
| C | -3.65480400 | -0.57386900 | -1.57617600 | O             | -1.91358800 | 1.57834500  | 2.28433200  | H | 1.31650400  | -2.14207400 | 1.88551100  |
| C | -2.31389700 | -2.58972300 | -3.01066600 | O             | -3.65128800 | 0.14080600  | 2.70300600  | C | 4.66947400  | -0.15994200 | 2.32151300  |
| H | -0.57823200 | -2.12268700 | -1.76838800 | C             | -2.88795300 | 0.78924100  | 1.98911600  | H | 3.94655800  | 1.13125900  | 0.72820600  |
| C | -4.32099000 | -1.27392600 | -2.59770500 | C             | -3.18050600 | 0.68826100  | 0.41061800  | C | 4.40635500  | -1.28008500 | 3.12841500  |
| H | -4.18205900 | 0.21585000  | -1.01878000 | C             | -3.66655000 | 1.87300700  | -0.20135200 | H | 2.99002100  | -2.86728700 | 3.60163500  |
| C | -3.65312700 | -2.28252200 | -3.31370700 | C             | -3.36168400 | -0.54313000 | -0.28795600 | H | 5.60738900  | 0.40454500  | 2.44555300  |
| H | -1.78519000 | -3.37530200 | -3.57351600 | C             | -4.40832300 | 1.82498700  | -1.39103000 | H | 5.13824800  | -1.59600900 | 3.88880800  |
| H | -5.36844900 | -1.02702500 | -2.83361900 | H             | -3.49522600 | 2.83099800  | 0.31476300  | C | 1.53646900  | -1.08387700 | -1.49975000 |
| H | -4.17724500 | -2.82862300 | -4.11437000 | C             | -4.11129300 | -0.59342700 | -1.47695000 | C | 2.72250900  | -1.83398000 | -1.65195400 |
| C | -2.46319100 | 1.39056000  | 0.57657200  | C             | -4.65373600 | 0.58778500  | -2.01472400 | C | 0.53057500  | -1.16368300 | -2.48881400 |
| C | -2.41743600 | 2.58556800  | -0.17664500 | H             | -4.81128400 | 2.75311000  | -1.82640700 | C | 2.89983100  | -2.64889600 | -2.78427000 |
| C | -3.33373700 | 1.30338500  | 1.68487900  | H             | -4.24331800 | -1.55050600 | -2.00468000 | H | 3.50697400  | -1.78738700 | -0.88070000 |
| C | -3.23878000 | 3.67109400  | 0.16701300  | H             | -5.24506200 | 0.54108600  | -2.94281600 | C | 0.71677400  | -1.97133900 | -3.62211600 |
| H | -1.72733900 | 2.66816000  | -1.03190400 | P             | 1.26148700  | 0.03525700  | -0.05849300 | H | -0.40550600 | -0.59455100 | -2.36050400 |



|                |             |             |             |    |             |             |             |   |             |             |             |
|----------------|-------------|-------------|-------------|----|-------------|-------------|-------------|---|-------------|-------------|-------------|
| C              | 1.90108100  | -2.71666700 | -3.77087000 | Pd | 0.93128300  | 0.39579400  | -0.26927200 | C | -3.57668500 | 1.63508200  | 0.89048300  |
| H              | 3.82487100  | -3.23725100 | -2.89230000 | C  | -1.80134000 | -0.95058700 | 1.40613300  | C | -2.66972200 | 3.98720600  | -0.36138300 |
| H              | -0.07179300 | -2.02654000 | -4.38930600 | C  | -1.34435000 | -0.50775100 | 2.67007700  | H | -0.97514900 | 2.79228100  | -1.03295800 |
| H              | 2.04180200  | -3.35830500 | -4.65521300 | C  | -2.51907700 | -2.16160400 | 1.31337300  | C | -4.31536100 | 2.82578000  | 1.00598700  |
| C              | 1.79683900  | 1.70667600  | -0.63557100 | C  | -1.61790800 | -1.25994700 | 3.82261800  | H | -3.93017200 | 0.71854800  | 1.38876600  |
| C              | 2.49975400  | 1.91238800  | -1.84279400 | H  | -0.76923100 | 0.42871300  | 2.75340800  | C | -3.86548400 | 4.00112100  | 0.37890500  |
| C              | 1.45711400  | 2.81892300  | 0.17211200  | C  | -2.78175000 | -2.91538000 | 2.47186000  | H | -2.30858500 | 4.90762800  | -0.84689400 |
| C              | 2.86472200  | 3.21377700  | -2.23075000 | H  | -2.86894600 | -2.52232900 | 0.33396900  | H | -5.24733000 | 2.83461500  | 1.59339800  |
| H              | 2.76094000  | 1.05484600  | -2.48212400 | C  | -2.33535100 | -2.46703100 | 3.72585700  | H | -4.44468000 | 4.93332600  | 0.47421500  |
| C              | 1.82773900  | 4.11517400  | -0.22048600 | H  | -1.25896900 | -0.90583300 | 4.80200100  | C | 3.78377200  | -0.05502000 | 0.06163700  |
| H              | 0.89348500  | 2.67033500  | 1.10956200  | H  | -3.33817200 | -3.86237400 | 2.38842900  | C | 5.16282700  | 0.09246000  | -0.25428800 |
| C              | 2.53155300  | 4.31461700  | -1.42221800 | H  | -2.54015900 | -3.06131500 | 4.63043700  | C | 5.65806200  | 1.26217800  | -0.84131300 |
| H              | 3.41288600  | 3.36665400  | -3.17406000 | C  | -2.16338500 | -0.79617100 | -1.50752600 | C | 4.79637600  | 2.33156600  | -1.16001900 |
| H              | 1.55793800  | 4.97387900  | 0.41416900  | C  | -1.41315800 | -1.80417600 | -2.15978400 | C | 3.44140600  | 2.23180500  | -0.82773300 |
| H              | 2.81682000  | 5.33255200  | -1.73195100 | C  | -3.46850700 | -0.48895200 | -1.95433000 | C | 2.93792000  | 1.08291800  | -0.16500300 |
|                |             |             |             | C  | -1.98307000 | -2.50462700 | -3.23746400 | H | 5.84263500  | -0.75553800 | -0.08531700 |
|                |             |             |             | H  | -0.38087700 | -2.02699400 | -1.83237100 | H | 6.73065500  | 1.32933800  | -1.08507800 |
| <b>TS2_B-1</b> |             |             |             | C  | -4.02357800 | -1.19203700 | -3.03693100 | H | 5.18405200  | 3.24199900  | -1.64227000 |
|                |             |             |             | H  | -4.05272700 | 0.30305800  | -1.46060400 | H | 2.76448200  | 3.07905600  | -1.02289800 |
| P              | -1.38333600 | 0.07201800  | -0.07592100 | C  | -3.28388300 | -2.20234600 | -3.67744500 | N | 3.28544000  | -1.28602500 | 0.52880300  |
| C              | 1.59333200  | 1.67078200  | 0.90961600  | H  | -1.39561800 | -3.28880200 | -3.74083400 | C | 4.17614300  | -2.09224800 | 1.36944000  |
| O              | 1.69680100  | 2.29912600  | 1.90193300  | H  | -5.04039900 | -0.94590700 | -3.38244400 | H | 4.92949400  | -2.66850500 | 0.78627700  |
| C              | 2.33347200  | -2.10725300 | -0.26602500 | H  | -3.72148800 | -2.75095100 | -4.52691700 | H | 4.69256300  | -1.43177000 | 2.09376200  |
| O              | 1.51477000  | -1.47552700 | -1.05578200 | C  | -2.37600100 | 1.61530500  | 0.14633200  | H | 3.56235000  | -2.83386000 | 1.91226800  |
| O              | 2.40854200  | -3.32291900 | -0.11823300 | C  | -1.92498600 | 2.80152300  | -0.47273900 |   |             |             |             |

|    |             |             |             |   |             |             |             |   |             |             |             |
|----|-------------|-------------|-------------|---|-------------|-------------|-------------|---|-------------|-------------|-------------|
|    |             |             |             | H | 3.61653100  | -2.05563400 | 0.32462100  | H | -3.43962200 | -3.30127900 | 0.65374700  |
|    |             |             |             | C | 1.89064600  | -2.71656300 | -3.12756600 | H | -5.60508100 | 1.06567000  | -0.59111300 |
|    |             |             |             | H | 0.52776500  | -1.10362500 | -2.58085500 | H | -7.01375700 | -0.89490200 | 0.03380500  |
| Pd | -0.86625600 | 0.44891300  | -0.28680900 | C | 2.99395500  | -3.49388700 | -2.73142900 | N | -2.83635600 | 1.05494500  | -0.62100100 |
| O  | -1.49316500 | 2.75164700  | 0.67750400  | H | 4.47164200  | -3.86435700 | -1.17421500 | C | -3.13680200 | 1.82887800  | -1.83487200 |
| O  | -3.74301400 | 2.65129200  | 1.26513900  | H | 1.39539200  | -2.90988000 | -4.09233200 | H | -3.17881000 | 1.17867900  | -2.73654500 |
| C  | -2.67553100 | 2.45945800  | 0.75972500  | H | 3.36778400  | -4.29638800 | -3.38716500 | H | -4.10294600 | 2.37696100  | -1.75081500 |
| P  | 1.37757800  | -0.06391100 | -0.01207300 | C | 2.38983500  | 1.40814400  | -0.50148700 | H | -2.33931900 | 2.58486000  | -1.98305600 |
| C  | -1.64211000 | -1.35322200 | -0.02183000 | C | 3.63831800  | 1.29573000  | -1.15256600 |   |             |             |             |
| O  | -1.01317900 | -2.37330100 | 0.17720700  | C | 1.86815600  | 2.69249400  | -0.21583600 |   |             |             |             |
| C  | 1.94229300  | -0.46288700 | 1.70555100  | C | 4.35875100  | 2.45077500  | -1.50270900 |   |             |             |             |
| C  | 1.37782700  | -1.58784400 | 2.35306200  | H | 4.04717800  | 0.30180600  | -1.39226300 |   |             |             |             |
| C  | 2.87681600  | 0.33907400  | 2.39581400  | C | 2.59725800  | 3.84287000  | -0.56347800 |   |             |             |             |
| C  | 1.75584600  | -1.90484000 | 3.66731900  | H | 0.88510400  | 2.79763500  | 0.27362800  |   |             |             |             |
| H  | 0.64075700  | -2.21106800 | 1.82218200  | C | 3.84195500  | 3.72480300  | -1.20695000 |   |             |             |             |
| C  | 3.24537400  | 0.01749900  | 3.71471700  | H | 5.33025200  | 2.35272800  | -2.01304900 |   |             |             |             |
| H  | 3.31779000  | 1.22007400  | 1.90482400  | H | 2.18249000  | 4.83747400  | -0.33531200 |   |             |             |             |
| C  | 2.68842800  | -1.10363300 | 4.35211200  | H | 4.40818700  | 4.62810300  | -1.48481900 |   |             |             |             |
| H  | 1.31238200  | -2.78321800 | 4.16281700  | C | -5.32746500 | -2.22686200 | 0.39139700  |   |             |             |             |
| H  | 3.97414300  | 0.65109000  | 4.24503600  | C | -3.93335100 | -2.35352300 | 0.38993100  |   |             |             |             |
| H  | 2.97794300  | -1.35249100 | 5.38551000  | C | -3.13243800 | -1.24642200 | 0.02880500  |   |             |             |             |
| C  | 2.03029900  | -1.44710000 | -1.04590900 | C | -3.71918800 | 0.00094900  | -0.32244700 |   |             |             |             |
| C  | 3.13450100  | -2.23305700 | -0.64975400 | C | -5.13010500 | 0.10916700  | -0.32989100 |   |             |             |             |
| C  | 1.40704200  | -1.70102200 | -2.28712200 | C | -5.91620700 | -0.99542200 | 0.02891800  |   |             |             |             |
| C  | 3.61249300  | -3.25232100 | -1.49213700 | H | -5.96193000 | -3.08271000 | 0.66969300  |   |             |             |             |
